# Supplementary material for: Is exercise-based cardiac rehabilitation effective? A systematic review and meta-analysis to re-examine the evidence
Source: PubMed Central journal article supplement — BMJ Open. 2018 Mar 14;8(3):e019656. doi: 10.1136/bmjopen-2017-019656 (PMC5857699; doi:10.1136/bmjopen-2017-019656), 2018-03-14
Supplement: bmjopen-2017-019656.draft_revisions.pdf [file bmjopen-2017-019656.draft_revisions.pdf]

# BMJ Open

BMJ Open is committed to open peer review. As part of this commitment we make the peer review history of every article we publish publicly available.

When an article is published we post the peer reviewers' comments and the authors' responses online. We also post the versions of the paper that were used during peer review. These are the versions that the peer review comments apply to.

The versions of the paper that follow are the versions that were submitted during the peer review process. They are not the versions of record or the final published versions. They should not be cited or distributed as the published version of this manuscript.

BMJ Open is an open access journal and the full, final, typeset and author-corrected version of record of the manuscript is available on our site with no access controls, subscription charges or pay-per-view fees (<http://bmjopen.bmj.com>).

If you have any questions on BMJ Open's open peer review process please email [editorial.bmjopen@bmj.com](mailto:editorial.bmjopen@bmj.com)

# BMJ Open

## Is exercise-based cardiac rehabilitation effective: re-examination of the evidence

### Systematic review and meta-analysis

|                                 |                                                                                                                                                                                                                                                                                                                                                                                                                                                                                                                                                                                                                                                                                                                                                                                                                                                                          |
|---------------------------------|--------------------------------------------------------------------------------------------------------------------------------------------------------------------------------------------------------------------------------------------------------------------------------------------------------------------------------------------------------------------------------------------------------------------------------------------------------------------------------------------------------------------------------------------------------------------------------------------------------------------------------------------------------------------------------------------------------------------------------------------------------------------------------------------------------------------------------------------------------------------------|
| Journal:                        | <i>BMJ Open</i>                                                                                                                                                                                                                                                                                                                                                                                                                                                                                                                                                                                                                                                                                                                                                                                                                                                          |
| Manuscript ID                   | bmjopen-2017-019656                                                                                                                                                                                                                                                                                                                                                                                                                                                                                                                                                                                                                                                                                                                                                                                                                                                      |
| Article Type:                   | Research                                                                                                                                                                                                                                                                                                                                                                                                                                                                                                                                                                                                                                                                                                                                                                                                                                                                 |
| Date Submitted by the Author:   | 18-Sep-2017                                                                                                                                                                                                                                                                                                                                                                                                                                                                                                                                                                                                                                                                                                                                                                                                                                                              |
| Complete List of Authors:       | Powell, Richard; University Hospitals Coventry and Warwickshire NHS Trust, Department of Cardiac Rehabilitation, Centre for Exercise & Health, ; University of Warwick, Warwick Clinical Trials Unit, Warwick Medical School,<br>McGregor, Gordon; University Hospitals Coventry and Warwickshire NHS Trust, Department of Cardiac Rehabilitation, Centre for Exercise & Health, ; Coventry University, Faculty of Health and Life Sciences,<br>Ennis, Stuart; University Hospitals Coventry and Warwickshire NHS Trust, Department of Cardiac Rehabilitation, Centre for Exercise & Health, ; Cardiff Metropolitan University, Cardiff Centre for Exercise & Health,<br>Kimani, Peter; University of Warwick, Statistics and Epidemiology Unit, Warwick Medical School,<br>Underwood, Martin; Warwick University, Warwick Clinical Trials Unit, Warwick Medical School, |
| <b>Primary Subject Heading</b>: | Rehabilitation medicine                                                                                                                                                                                                                                                                                                                                                                                                                                                                                                                                                                                                                                                                                                                                                                                                                                                  |
| Secondary Subject Heading:      | Cardiovascular medicine, Evidence based practice                                                                                                                                                                                                                                                                                                                                                                                                                                                                                                                                                                                                                                                                                                                                                                                                                         |
| Keywords:                       | Coronary heart disease < CARDIOLOGY, Ischaemic heart disease < CARDIOLOGY, Myocardial infarction < CARDIOLOGY, REHABILITATION MEDICINE                                                                                                                                                                                                                                                                                                                                                                                                                                                                                                                                                                                                                                                                                                                                   |
|                                 |                                                                                                                                                                                                                                                                                                                                                                                                                                                                                                                                                                                                                                                                                                                                                                                                                                                                          |

SCHOLARONE™  
Manuscripts

# Is exercise-based cardiac rehabilitation effective: re-examination of the evidence

## *Systematic review and meta-analysis*

R Powell <sup>1,5\*</sup>, G McGregor <sup>1,2</sup>, S Ennis <sup>1,3</sup>, P K Kimani <sup>4</sup>, M Underwood <sup>5</sup>

<sup>1</sup> Department of Cardiac Rehabilitation, Centre for Exercise & Health, University Hospital, Coventry, CV1 3LN, UK, <sup>2</sup> Faculty of Health and Life Sciences, Coventry University, Coventry, CV1 5FB, UK, <sup>3</sup> Cardiff Centre for Exercise & Health, Cardiff Metropolitan University, Cardiff, CF5 2YB, UK <sup>4</sup> Statistics and Epidemiology Unit, Warwick Medical School, University of Warwick, Coventry, CV4 7AL, UK, <sup>5</sup> Warwick Clinical Trials Unit, Warwick Medical School, University of Warwick, Coventry, CV4 7AL, UK.

R Powell, Clinical Exercise Physiologist

G McGregor, Clinical Research Fellow

S Ennis, Clinical Exercise Physiologist

P K Kimani, Assistant Professor in Medical Statistics

M Underwood, Professor

\*Correspondence to: Richard Powell, [Richard.powell@uhcw.nhs.uk](mailto:Richard.powell@uhcw.nhs.uk)

### **Word count**

3360 words

## Abstract

### *Objectives*

To determine the contemporary effectiveness of exercise-based CR.

### *Data sources*

Studies included in, or meeting the entry criteria for the 2016 Cochrane review of exercise-based CR in patients with coronary artery disease.

### *Study eligibility criteria*

Randomised controlled trials (RCTs) of exercise-based CR vs. a no exercise control whose participants were recruited after the year 2000.

### *Study appraisal and synthesis methods*

Two separate reviewers independently screened the characteristics of studies. One reviewer quality appraised any new studies and assessed their risk of bias using the Cochrane Collaboration's recommended risk of bias tool. Data were reported as the risk difference (95% CI).

### *Results*

We included 22 studies with 4,834 participants (mean age 59.5 years, 78.4% male). We found no differences in outcomes at their longest follow-up period for: all-cause mortality (19 studies; n=4,194; risk difference 0.00, 95% CI -0.02 to 0.01, p=0.38), cardiovascular mortality (9 studies; n= 1,182; risk difference -0.01, 95% CI -0.02 to 0.01, p=0.25) and hospital admissions (11 studies; n= 1,768; risk difference -0.05, 95% CI -0.10 to -0.00, p=0.05).

### *Conclusions and implications of key findings*

These data do not support the continued use of exercise-based CR for secondary prevention in people with coronary artery disease.

### *Systematic review registration number*

Prospero: International prospective register of systematic reviews. 2017. 42017073616.  
Available from: [https://www.crd.york.ac.uk/PROSPERO/display\\_record.asp?ID=CRD42017073616](https://www.crd.york.ac.uk/PROSPERO/display_record.asp?ID=CRD42017073616)

### *Strengths and Limitations of this study*

- To our knowledge, this is the first systematic review of exercise-based CR that has pooled data relevant to the current medical management of patients diagnosed with coronary artery disease.

- For analysis, we present the data as the risk difference (95% CI), which ensures all studies reporting data on the outcomes of interest were included.
- This systematic review pools data from studies that deliver an intervention recognised as best practice in exercise-based Cardiac Rehabilitation, where multiple approaches, including educational/psychosocial components, as well as the exercise component were used.
- We have not done a de novo quality assessment of 21/22 studies included in this review and instead rely on previous Cochrane assessment.
- We did not include health-related quality of life as an outcome measure as this unsuitable for meta-analysis.

## Keywords

Coronary artery disease, exercise-based cardiac rehabilitation, all-cause mortality, cardiovascular mortality, hospital admissions.

## Background

Cardiovascular disease is the world's biggest killer, accounting for 15 million deaths in 2015(1).

Secondary prevention of coronary artery disease through exercise-based CR in those who have a diagnosis of coronary artery disease has the potential to reduce mortality, reduce hospital admissions and increase quality of life. Guidelines internationally endorse the use of exercise-based CR programmes(2-5).

Typically, exercise-based CR aims to achieve 20-60 minutes of moderate intensity continuous exercise, 3-5 times a week, with muscular strength and endurance exercises prescribed in conjunction(6). Additionally, most programmes include supplementary education (coronary risk factors and cardiac misconceptions), advice on diet and access to psychological support to supplement the exercise training(2,4,7,8). Typically exercise-based CR is delivered in a supervised centre-based setting, although home-based programmes are used(9).

A 2016 Cochrane review (63 studies, n=14,486 participants) found benefits of exercise-based CR for patients with coronary artery disease. Both cardiovascular mortality (27 studies, RR 0.74, 95% CI 0.64 to 0.86) and hospital re-admissions were reduced (15 studies, RR 0.82, 95% CI 0.70 to 0.96), when compared to a no exercise control. However, in contrast to previous systematic reviews and meta-analyses, there was no reduction in risk of re-infarction (36 studies, RR 0.90, 95% CI 0.79 to 1.04) or all-cause mortality (47 studies, RR 0.96, 95% CI 0.88 to 1.04)(10).

Over recent decades, the medical management of coronary artery disease has been transformed. The introduction of primary percutaneous coronary intervention has reduced short-term major adverse cardiac events and increased long-term survival(11-14). Simultaneously, there have also been widespread

1 advances in secondary preventative medical therapy. This includes the introduction of aspirin and beta-  
2 blockers in the 1980s(15,16), lipid-lowering statins and angiotensin converting enzyme inhibitors in the  
3 1990s(17,18) and more recently, the introduction of clopidogrel, a secondary anti-platelet, in  
4 2007(19,20). Age-adjusted mortality has decreased substantially in this population(21). Systematic  
5 reviews and meta-analyses that include data from older studies may not correctly assess the potential  
6 effect of exercise-based CR. We hypothesise that previous reviews have overestimated the potential  
7 health gain from exercise-based CR.  
8  
9  
10

## 11 **Objectives**

12  
13  
14  
15  
16 To determine the contemporary effectiveness of exercise-based CR on all-cause mortality,  
17 cardiovascular mortality, and hospital readmissions in patients with coronary artery disease.  
18

## 19 **Methods**

### 20 ***Search Strategy***

21  
22  
23 To identify relevant studies, we started with the latest Cochrane review of exercise-based CR in  
24 patients with coronary artery disease(10). Studies identified as 'awaiting assessment' or 'on-going' in this  
25 review were re-visited to establish whether publication had been reached. To identify any new studies  
26 published since the completion of the Cochrane review, an updated search was run on the 28/2/2017.  
27 This search used the same search strategies as the latest Cochrane review(10). We searched Cochrane  
28 Central Register of Controlled Trials (CENTRAL) (*appendix 1*), MEDLINE (Ovid), EMBASE (Ovid) and  
29 CINAHL (EBSCO) databases. This approach allowed us to efficiently identify all relevant studies. Where  
30 appropriate, we contacted original authors for clarification of any new included studies.  
31

32  
33  
34  
35  
36 Two separate reviewers (RP and GM) independently screened the characteristics of studies in  
37 the latest Cochrane review, studies identified as 'awaiting assessment' or 'on-going' and studies  
38 identified in the updated search. Full text publications were retrieved to allow for further examination  
39 and to verify study inclusion. Any discrepancies were resolved by a third reviewer (MU).  
40  
41

### 42 ***Criteria for considering studies***

43  
44  
45 In 1996, The Task Force on the Management of Acute Myocardial Infarction of the European  
46 Society of Cardiology first recommended early (within two hours) primary percutaneous interventions in  
47 preference to thrombolytic therapy for acute myocardial infarction(22). Two years later, guidelines set by  
48 the Joint British recommendations on prevention of Coronary Heart Disease in Clinical Practice were  
49 published outlining the recommendations for best practice for secondary prevention medical  
50 therapies(23). Although there have been some changes, notably the introduction of a second anti-platelet  
51 agent in the early 2000s(19,20), the approach to secondary prevention medical therapies has not  
52 changed since then. Allowing time for implementation of these guidelines and recommendations, we  
53  
54  
55  
56  
57

1 identified and included studies whose participants were recruited after the year 2000, to represent a  
2 contemporary population engaging in exercise-based CR.  
3

4 Where there was no indication of recruitment period, the diagnosis and the secondary  
5 preventative medical therapy received by participants included in the trial determined the inclusion or  
6 exclusion of the study in the analysis.  
7

### 8 9 ***Types of studies***

10  
11 We included randomised controlled trials of exercise-based CR compared to a no exercise  
12 control with a minimum follow-up period of six months. Data reported at the longest follow-up period  
13 were included in the analysis.  
14  
15

### 16 17 ***Types of participants***

18  
19 We used the same entry criterion as previous Cochrane reviews.  
20

- 21  
22 • People who have had a myocardial infarction, or who had undergone revascularisation  
23 (coronary artery bypass grafting or percutaneous coronary intervention) or who have  
24 angina pectoris or coronary artery disease defined by angiography.  
25  
26
- 27 • On optimal secondary preventative medical therapy.  
28  
29
- 30 • Recruited to hospital-based, community-based or home-based CR programmes.  
31  
32

### 33 34 ***Types of intervention(s)***

35  
36 Randomised controlled trials consisted of supervised or non-supervised exercise-based CR. The  
37 intervention was exercise alone or exercise as part of a comprehensive CR programme (consisting of  
38 educational/psychosocial components). 'No exercise control' consisted of standard medical care,  
39 including optimal secondary preventative medical therapy, education and advice about diet and exercise,  
40 psychosocial support but with no formal exercise intervention.  
41  
42  
43

### 44 45 ***Types of outcome measures***

46  
47 We extracted data on: all-cause mortality, cardiovascular mortality and hospital re-admissions.  
48 We did not include health-related quality of life as the authors of the 2016 Cochrane review found this  
49 unsuitable for meta-analysis.  
50  
51

### 52 53 ***Data collection, statistical analysis and quality assessment***

54  
55 We pooled data using Review Manager 5.3(24). Previous Cochrane reviews have presented the  
56 data as individual and pooled risk ratio (95% CI). Using risk ratios automatically removed studies with  
57

1 no events in either study arm from the analysis. Nine studies (n= 936 participants) reporting on all-  
2 cause mortality, cardiovascular mortality or hospital re-admissions, were excluded from one or more  
3 meta-analyses in the 2016 Cochrane review for this reason. We therefore present the data as the risk  
4 difference (95% CI), which ensures all studies reporting data on the outcomes of interest were included.  
5  
6

7 We applied a random-effects model to all analyses given the clinical heterogeneity of individual  
8 studies. Heterogeneity of included studies were tested statistically using the  $\chi^2$  test of heterogeneity and  
9  $I^2$  statistic(25).  
10

11 We did not repeat quality assurance checks already completed by the authors of the Cochrane  
12 review. For separate study risk of bias breakdown for these studies, we refer the reader to the existing  
13 *characteristics of studies*(10). For studies identified as 'awaiting assessment' or 'on-going' in the latest  
14 Cochrane review, or in the updated search, we quality appraised these studies and assessed their risk of  
15 bias using the Cochrane Collaboration's recommended risk of bias tool(26).  
16  
17  
18  
19  
20  
21

### 22 ***Assessment of risk of bias in additional included study***

23  
24 One reviewer (RP) assessed the risk of bias in any additional included studies (*table 1*).  
25 Assessment of three further quality domains as outlined in the latest Cochrane review was also  
26 conducted (Groups balanced at baseline, Intention-to-treat analysis, Groups received comparable  
27 treatment (except exercise)). A breakdown of the criteria used for assessing these three domains can be  
28 found in the latest Cochrane review. Risk of bias assessments were checked by a second reviewer (GM)  
29 and any discrepancies were resolved by a third reviewer (MU).  
30  
31  
32  
33

### 34 ***Patient Involvement***

35  
36 No patients were involved in setting the objectives or outcome measures of this review, nor were  
37 they involved in the design or implementation. No patients were involved in the analysis or  
38 interpretation of the results, nor the writing of any drafts. There are no plans to disseminate the results  
39 of the review to participants included in the studies of the review or any relevant patient networks.  
40  
41  
42

## 43 **Results**

### 44 ***Studies retrieved***

45  
46 Of the sixty-three studies included in the Cochrane review, twenty-one studies met our entry  
47 criteria. We identified two additional relevant papers not included in the 2016 Cochrane review(27,28).  
48 One was excluded because data for our specific research question were not available in a useable  
49 format(27). In total, twenty-two studies (n=4,834 participants) contributed to the analysis. For the study  
50 identified from the updated search(28), there was a low risk of bias in all eight domains, apart from the  
51 intention-to-treat analysis, where there was no evidence of this analysis being conducted (*table 1*).  
52  
53  
54  
55  
56  
57  
58  
59  
60



1 Three studies (3/22; 14%) reported on all three outcomes of interest, eleven studies (11/22; 50%)  
2 reported on two outcomes of interest and eight studies (8/22; 36%) reported on one outcome of interest.

3 Two studies for all-cause mortality(29,30) and one study for cardiovascular mortality(29)  
4 reported data at varying follow-up periods (6 to 12 months; >12 to 36 months; >3 years). Data from  
5 these studies were taken at their longest follow-up period.  
6  
7

### 8 9 **Flow diagram**

10  
11  
12 (figure 1).  
13

### 14 15 **Sample size, gender, age and study origin**

16  
17 Of our twenty-two studies, ten studies were in Europe(28-37) and twelve from outside of  
18 Europe(38-49). We included a total of 4,834 participants (3,788 (78.4%) males). Four studies included  
19 males only(29,33,44,46) and one study included women only(50). Participants mean age was 59.5 years.  
20 The mean age for individual studies ranged from 47.5 to 76.9 years (table 2).  
21  
22

### 23 24 **Incomplete outcome data**

25  
26 The majority of trials (18/22; 82%) reported complete follow-up data, regardless of participants  
27 who were lost to follow-up or who dropped out. In four studies, outcome data were incomplete for 75  
28 (75/4,834; 1.6%) participants with no description of withdrawal or drop-out(40,46,47,49).  
29  
30

### 31 32 **Participant diagnosis of coronary artery disease and treatment received**

33  
34 The diagnosis of participants recruited to the studies was described in the majority of studies  
35 (21/22; 95%). Thirteen studies enrolled participants with mixed diagnoses, including angina pectoralis  
36 or coronary artery disease defined by angiography, myocardial infarction, percutaneous coronary  
37 interventions or coronary artery bypass grafts(31,35-41,43,45-47,49). Six studies enrolled participants  
38 following acute myocardial infarction only(28,30,32,33,42,48) and two studies enrolled participants  
39 diagnosed with angina pectoralis (unstable and stable angina) only(29,34). It was unclear from one  
40 study whether participants following myocardial infarction were included and instead, the population  
41 was defined as 'patients after coronary artery bypass graft surgery'(44) (table 2).  
42  
43

44 Six studies only recruited participants following percutaneous coronary intervention only(29,31,  
45 32,34,40,45) and one study recruited participants following coronary artery bypass grafting only(44).  
46 Twelve studies included participants who had received thrombolysis, percutaneous coronary  
47 intervention, coronary artery bypass grafting and/or no revascularization procedure(30,35-39,41-  
48 43,46,47,49). Three studies did not provide any breakdown of coronary intervention or surgical  
49 procedure received by participants prior to enrollment(28,33,48) (table 2).  
50  
51

### 52 53 **Medication**

1 A full description and breakdown of the medication received by the participants, comparable to  
2 optimal secondary prevention medical therapy defined by the Joint British recommendations on  
3 prevention of Coronary Heart Disease in Clinical Practice set in 1998(23), was provided by 13/22 studies  
4 (59%)(29-32,34-39,42,48,49). References to co-existing medical therapies were made in 7/22 (32%), but  
5 no breakdowns were provided(28,33,40,41,44-46). One study referred to the prescription of anti-  
6 hypertensive and hypolipidemic medications without reference to other recommended medications(47).  
7 One study failed to provide any description or breakdown of co-existing medical therapies(43) (*table 2*).  
8  
9  
10  
11

### 12 ***Clearly defined recruitment period***

13  
14  
15 Seven studies (7/22; 32%) were explicit that they recruited participants after the year  
16 2000(35,37,41,43-45,48). In three studies, participants were recruited either just before or during the  
17 year 2000(29,30,40). Due to participant diagnosis, treatment received and co-existing medical  
18 therapies, it was agreed by all reviewers to include these studies.  
19

20 The remaining twelve studies failed to provide a recruitment period. Following further  
21 examination of the full papers, due to adequate description of patient diagnosis, treatment received and  
22 co-existing medical therapies, it was agreed by all reviewers to include these studies (*table 2*).  
23  
24

### 25 ***Content of the interventions***

26  
27  
28 The content of the interventions tested were heterogeneous in nature with multiple approaches  
29 being adopted. Sixteen studies (16/22; 73%) compared exercise in combination with other therapies  
30 (education, psychosocial management), whilst six studies compared exercise as a stand-alone  
31 intervention, against a no exercise control. The exercise component alone varied considerably with  
32 respect to setting, training modality, duration, session length, frequency and intensity (*table 3*).  
33  
34  
35

### 36 ***Overall effects of interventions***

#### 37 *All-cause mortality*

38  
39  
40  
41 Nineteen studies (n=4,194 participants) reported all-cause mortality (*figure 2*). There was no  
42 difference between groups at their longest follow-up (risk difference = 0.00, 95% CI -0.02 to 0.01,  
43 p=0.38).  
44  
45

#### 46 *Cardiovascular mortality*

47  
48  
49  
50 Nine studies (n = 1,182 participants) reported cardiovascular mortality (*figure 3*). There was no  
51 difference between groups at their longest follow-up (risk difference = -0.01, 95% CI -0.02 to 0.01,  
52 p=0.25).  
53  
54

#### 55 *Hospital admissions*

1  
2  
3  
4  
5  
6  
7  
8  
9  
10  
11  
12  
13  
14  
15  
16  
17  
18  
19  
20  
21  
22  
23  
24  
25  
26  
27  
28  
29  
30  
31  
32  
33  
34  
35  
36  
37  
38  
39  
40  
41  
42  
43  
44  
45  
46  
47  
48  
49  
50  
51  
52  
53  
54  
55  
56  
57  
58  
59  
60

Eleven studies (n= 1,768 participants) reported on proportion with one or more hospital admissions (*figure 4*). There was a reduction of borderline statistical significance (risk difference = -0.05, 95% CI -0.10 to -0.00, p=0.05).

## Discussion

The majority of interventions tested in the twenty-two trials (*table 3*) have delivered an intervention recognised as best practice in exercise-based CR, where multiple approaches, including educational/psychosocial components, as well as the exercise component were used(2,3,8).

Nevertheless, for all-cause mortality, the risk difference is 0.00 (95% CI -0.02 to 0.01). The largest trial included in our analysis, the UK-based Rehabilitation after myocardial infarction trial (RAMIT) trial, sought to show a 20% reduction in relative risk based on an 11% mortality; i.e. a 2.2% risk difference(30). The limits of the 95% confidence interval for the effect do not include the RAMIT trial's pre-specified clinically important difference. We therefore conclude that it is extremely unlikely that there is a worthwhile benefit from exercise-based CR on all-cause mortality. Furthermore, it is unlikely that any further trials of similar interventions, on similar populations, will change this conclusion.

Whilst no effect was seen on cardiovascular mortality, the limits of the 95% confidence intervals do not exclude a potential benefit. Any reduction in cardiovascular mortality is of very limited clinical relevance in the context of the overwhelming evidence of no effect on all-cause mortality.

These analyses however do not quite exclude a worthwhile effect on hospital admissions. Whilst the risk difference of -0.05 (95% CI -0.10 to -0.00) is of borderline statistical significance it is probably clinically unimportant in the context of no change on overall mortality.

We do not know, however, if there is a worthwhile benefit on quality of life. The authors of the 2016 Cochrane review reported some evidence for an improvement in quality of life in at least half of the sub-scales in four of the twenty-two studies we included that reported on differences in quality of life(31,44,45,48). Nevertheless, the largest included study (n=1813) found no differences at one year in any of the eight domains of the SF-36 or the three domains of the psychological general well-being score(30). This suggests that a worthwhile benefit on health-related quality of life, measured in this way, is very unlikely.

Five of the included papers in this review included a within trial health economic evaluation(29,39,42,43,49). Of these five papers, three studies showed no difference in healthcare costs between groups(39,42,49), one found healthcare costs to be lower for exercise-based CR(29), and one failed to report a p-value for cost difference(43). Based on these data, we are unable to comment on whether exercise-based CR might be cost-effective.

Based on health outcomes of all-cause mortality, cardiovascular mortality and rate of hospital admissions, the evidence in our review is insufficient to justify the use of exercise-based CR. It is for stakeholders to acknowledge these findings and decide whether outcomes of cardiorespiratory fitness, self-confidence, return to work and/or psychosocial outcomes should instead be the focus(3,7,51,52). Whether these 'softer' outcomes are enough to convince commissioners of health care services to continue to invest in CR interventions remains unknown.

## Strengths and Limitations

1  
2  
3 To our knowledge, this is the first systematic review of exercise-based CR that has pooled data  
4 relevant to the current medical management of patients diagnosed with coronary artery disease.  
5 Although we have not done a de novo quality assessment of 21/22 studies included in this review and  
6 instead relying on previous Cochrane assessment, it is unlikely we would have drawn different  
7 conclusions from such an assessment(10).  
8

9  
10 Whilst there was no evidence of statistical heterogeneity across trials for all outcome measures  
11 (P value < 0.01, I<sup>2</sup> >30%), there was substantial context and interventional heterogeneity. The studies  
12 came from a wide range of clinical environments and countries, and the interventions delivered ranged  
13 greatly in quality. When compared with both the BACPR ‘minimum standards and core components’(8)  
14 and ACPICR guidelines(6) for the UK, there was considerable variation in the exercise component of the  
15 interventions delivered (*table 3*). Critics have questioned the exercise component delivered and reported  
16 in the RAMIT trial(30). They argued that under-dosage of exercise regarding the modality, intensity and  
17 duration of training sessions led to its inconclusive result(53). Several other studies included in this  
18 review fail to report on the intensity, modality and/or duration of the exercise component of the  
19 interventions. Any benefits of exercise in patients with coronary artery disease are likely to be ‘dose-  
20 dependent’(54). If patients engaging in exercise-based CR do not reach the correct dose of exercise, it is  
21 unlikely that the physiological benefits will be achieved. It is a legitimate concern that participants in  
22 many included trials are not receiving an adequate dose of exercise. Nevertheless, if in our data there  
23 were sub-groups of participants who have received the correct dose and gained a worthwhile reduction  
24 in mortality, there must be an equal number of participants in other sub-groups who had died because of  
25 the intervention. This must be the case if the overall effect on mortality is zero.  
26  
27  
28  
29  
30

### 31 32 **Conclusion**

33  
34  
35 Based on the outcomes of all-cause mortality, cardiovascular mortality and hospital admissions,  
36 our analysis indicates conclusively that the current approach to exercise-based CR has no effect when  
37 compared to a no exercise control.  
38

39 If the provision of exercise-based CR is to continue in the UK, we recommend further research to  
40 assess its impact on other outcomes and to assess cost-effectiveness. Alternatively, we recommend  
41 different approaches to exercise which may include ‘high intensity interval training’(55). This may help  
42 patients to achieve an adequate exercise ‘dose’ and ensure gains in cardiorespiratory fitness. We suggest  
43 these interventions and outcomes should only be delivered and measured in the context of randomised  
44 controlled trials.  
45  
46  
47

### 48 **Contributors**

49  
50  
51 RP and MU were principally responsible for the study concept and design. RP and GM were  
52 responsible for study selection, data extraction and risk of bias assessment. RP updated and ran the  
53 searches. RP, MU and PK were responsible for statistical analysis and interpretation of data. GM and SE  
54 provided clinical advice. RP and MU wrote the first draft of the review and all co-authors contributed to  
55 review and editing of drafts of the report. All authors approved the final manuscript. RP is the study  
56  
57

1 guarantor and had full access to all trial level data in the review, takes responsibility for the integrity of  
2 the data, and accuracy of the data analysis, and had final responsibility to submit for publication.

### 3 **Copyright**

4  
5  
6  
7  
8 The Corresponding Author has the right to grant on behalf of all authors and does grant on  
9 behalf of all *authors*, a worldwide license to the Publishers and its licensees in perpetuity, in all forms,  
10 formats and media (whether known now or created in the future), to i) publish, reproduce, distribute,  
11 display and store the Contribution, ii) translate the Contribution into other languages, create  
12 adaptations, reprints, include within collections and create summaries, extracts and/or, abstracts of the  
13 Contribution, iii) create any other derivative work(s) based on the Contribution, iv) to exploit all  
14 subsidiary rights in the Contribution, v) the inclusion of electronic links from the Contribution to third  
15 party material where-ever it may be located; and, vi) license any third party to do any or all of the above.

### 16 **Funding**

17  
18  
19  
20 This review was not funded and hence no role was played by funders in the conception, data  
21 synthesis, analysis, interpretation or in the drafting of the manuscript.

### 22 **Competing interests**

23  
24  
25  
26 All authors have completed the *Unified Competing Interest form* (available on request from the  
27 corresponding author) and declare: no support from any organisation for the submitted work; no  
28 financial relationships with any organisations that might have an interest in the submitted work in the  
29 previous three years, no other relationships or activities that could appear to have influenced the  
30 submitted work.

### 31 **Ethical Approval**

32  
33  
34  
35  
36  
37  
38  
39  
40 Ethical approval not required.

### 41 **Data sharing**

42  
43  
44  
45  
46  
47  
48  
49  
50  
51  
52  
53  
54  
55  
56  
57  
58  
59  
60  
No additional data available.

The lead author (RP) affirms that the manuscript is an honest, accurate, and transparent  
account of the study being reported; that no important aspects of the study have been omitted; and that  
any discrepancies from the study as planned and registered have been explained.

### 53 **Tables**

#### 54 **Table 1. Risk of bias assessment for additional study**

Santaularia *et al.* 2017

| Bias                                                         | Authors' judgement | Support for judgement                                                                                                                                                                                                                         |
|--------------------------------------------------------------|--------------------|-----------------------------------------------------------------------------------------------------------------------------------------------------------------------------------------------------------------------------------------------|
| Random sequence generation (selection bias)                  | Low risk           | A randomisation list in blocks of ten was created by a computer random number generator. The randomisation list and the allocation of patients to each group were independently controlled by the Clinical Trials Unit.'                      |
| Allocation concealment (selection bias)                      | Low risk           | A randomisation list in blocks of ten was created by a computer random number generator. The randomisation list and the allocation of patients to each group were independently controlled by the Clinical Trials Unit.'                      |
| Blinding of outcome assessment (detection bias) All outcomes | Low risk           | An independent committee that was blind to the patients' treatment group assessed the main outcomes. This committee comprised a cardiologist, a rehabilitation cardiologist and a health information manager, all from different centres.'    |
| Incomplete outcome data (attrition bias) All outcomes        | Low risk           | There was no loss to follow-up.                                                                                                                                                                                                               |
| Selective reporting (reporting bias)                         | Low risk           | All outcomes described in the methods were reported in the results. Results regarding quality of life are presented in supplementary data but were not required for the current review.                                                       |
| Groups balanced at baseline                                  | Low risk           | No statistically significant differences in any baseline characteristics were observed between patients who agreed to participate and those who did not, except for age, which was higher in non-participants (65 vs. 60 years; $p = 0.006$ ) |
| Intention-to-treat analysis conducted                        | High risk          | No                                                                                                                                                                                                                                            |
| Groups received same treatment (apart from the intervention) | Low risk           | Patients assigned to the control group received standard care given at the hospital'. In addition to standard care, patients randomised to the intervention group....'.                                                                       |

**Table 2. Overview of participants, recruitment period, patient diagnosis and medical therapy**

| References, country                      | N       | Mean age (years) | Male participants (%) | Recruitment period (years) | Patient diagnosis                                                                     | Medication                                                                                                                                                    |
|------------------------------------------|---------|------------------|-----------------------|----------------------------|---------------------------------------------------------------------------------------|---------------------------------------------------------------------------------------------------------------------------------------------------------------|
| Aronov <i>et al.</i> (2010), Russia      | 39<br>2 | 61.4             | 73.5                  | None specified             | AMI, stable angina, unstable angina or myocardial revascularisation.                  | Standard medical therapy- $\beta$ -blocker, acetylsalicylic acid or other antithrombotic drug, nitrate, ACE inhibitor. Some patients on lipid-lowering drugs. |
| Belardinelli <i>et al.</i> (2001), Italy | 118     | 61               | 100                   | None specified             | CAD including AMI. Successful PCI in 1 or 2 native epicardial coronary arteries only. | According to international accepted protocols- aspirin, ticlopidine, calcium antagonists, nitrates.                                                           |
| Briffa <i>et al.</i>                     | 113     | 47.5             | 89.5                  | None                       | Uncomplicated AMI or                                                                  | Aspirin, antiarrhythmic agent, $\beta$ -                                                                                                                      |

|    |                    |     |      |      |              |                               |                                              |
|----|--------------------|-----|------|------|--------------|-------------------------------|----------------------------------------------|
| 1  | (2005),            |     |      |      | specified.   | recovery from unstable        | blocker, ACE inhibitor, calcium              |
| 2  | Australia          |     |      |      |              | angina. PCI, CABG,            | antagonist, long acting nitrate,             |
| 3  |                    |     |      |      |              | thrombolytic therapy.         | diuretic.                                    |
| 4  |                    |     |      |      |              |                               |                                              |
| 5  | Giallauria         |     |      |      |              |                               |                                              |
| 6  | <i>et al.</i>      |     |      |      | None         | AMI and undergone             | Aspirin, $\beta$ -blocker, ACE inhibitor,    |
| 7  | (2008),            | 61  | 58.5 | 78.5 | specified.   | primary or rescue PCI only.   | ARB, statin.                                 |
| 8  | Italy              |     |      |      |              |                               |                                              |
| 9  | Hambrech           |     |      |      |              |                               |                                              |
| 10 | <i>t et al.</i>    |     |      |      |              | Stable CAD defined by         | $\beta$ -receptor antagonists, $\beta$ -HMG- |
| 11 | (2004),            | 101 | 56   | 87.3 | 1997-2001    | angina pectoralis and         | CoA reductase inhibitors, ACE                |
| 12 | Germany            |     |      |      |              | amenable to PCI. AMI          | inhibitor, acetylsalicylic acid.             |
| 13 |                    |     |      |      |              | patients excluded.            |                                              |
| 14 | Higgins <i>et</i>  |     |      |      |              |                               | Reference to medical therapy, only           |
| 15 | <i>al.</i> (2001), | 105 | 60.8 | 81.3 | 1995-1997    | Post-PCI patients only. No    | breakdown for lipid lowering                 |
| 16 | Australia          |     |      |      |              | AMI 1 month pre-procedure.    | medication.                                  |
| 17 |                    |     |      |      |              |                               |                                              |
| 18 | Houle <i>et</i>    |     |      |      |              | Patients hospitalised for an  |                                              |
| 19 | <i>al.</i> (2012), | 65  | 51.5 | 100  | 2007-2008    | ACS (unstable angina, non-    | Reference to medication in usual             |
| 20 | Canada             |     |      |      |              | ST-elevation or ST elevation  | care group, but no breakdown.                |
| 21 |                    |     |      |      |              | MI). PCI, CABG or no          |                                              |
| 22 |                    |     |      |      |              | revascularisation procedure.  |                                              |
| 23 | Kovoor <i>et</i>   |     |      |      |              |                               | Aspirin, $\beta$ -blocker, ACE inhibitor,    |
| 24 | <i>al.</i> (2006), | 142 | 51.5 | 100  | None         | AMI only. Thrombolytic        | calcium channel blockers, nitrates,          |
| 25 | Australia          |     |      |      | specified.   | therapy, one patient in the   | cholesterol-lowering agents,                 |
| 26 |                    |     |      |      |              | exercise treatment group      |                                              |
| 27 |                    |     |      |      |              | had primary angioplasty.      |                                              |
| 28 | Maddison           |     |      |      |              |                               |                                              |
| 29 | <i>et al.</i>      |     |      |      |              | Diagnosis of IHD (angina,     | No description.                              |
| 30 | (2014),            | 171 | 59   | 20   | 2010-2012    | MI, revascularisation,        |                                              |
| 31 | New                |     |      |      |              | including angioplasty, stent, |                                              |
| 32 | Zealand            |     |      |      |              | or CABG).                     |                                              |
| 33 |                    |     |      |      |              |                               |                                              |
| 34 |                    |     |      |      |              |                               |                                              |
| 35 | Maroto <i>et</i>   |     |      |      |              | (None                         | Medication regimens employed in              |
| 36 | <i>al.</i> (2005), | 180 | 76.9 | 57.5 | specified) 2 | year                          | secondary prevention at discharge            |
| 37 | Spain              |     |      |      | enrollment   | period.                       | were clearly insufficient by standard        |
| 38 |                    |     |      |      |              | AMI only.                     | criteria but currently meet Spanish          |
| 39 |                    |     |      |      |              |                               | and European guidelines'.                    |
| 40 | Munk <i>et</i>     |     |      |      |              |                               |                                              |
| 41 | <i>al.</i> (2009), | 40  | 56.4 | 84.8 | None         | Stable angina and unstable    | Aspirin, $\beta$ -blocker, ACE inhibitor,    |
| 42 | Norway             |     |      |      | specified.   | angina, post PCI only. AMI    | ARB, statin, acetylsalicylic acid.           |
| 43 |                    |     |      |      |              | patients excluded.            |                                              |
| 44 | Mutwalli           |     |      |      |              |                               |                                              |
| 45 | <i>et al.</i>      |     |      |      |              | Undergone CABG surgery.       | Participants received advice that            |
| 46 | (2012),            | 49  | 69.7 | 100  | 2008-2010    | Unknown whether AMI           | focused on medications', no                  |
| 47 | Saudi              |     |      |      |              | patients included.            | breakdown.                                   |
| 48 | Arabia             |     |      |      |              |                               |                                              |
| 49 |                    |     |      |      |              |                               |                                              |
| 50 |                    |     |      |      |              |                               |                                              |
| 51 | Oerkild <i>et</i>  |     |      |      |              | Recent coronary event         | $\beta$ -blocker, antithrombotics, calcium   |
| 52 | <i>al.</i> (2012), | 40  | 63.5 | 0    | 2007-2008    | defined as AMI, PCI, CABG     | antagonists, lipid-lowering agents,          |
| 53 | Denmark            |     |      |      |              | or without invasive           | diuretics.                                   |
| 54 |                    |     |      |      |              | procedure.                    |                                              |
| 55 | Reid <i>et al.</i> |     |      |      |              |                               |                                              |
| 56 | (2012),            | 22  |      |      |              | ACS including AMI,            | Reference to a 'descriptive summary          |
| 57 | Canada             | 3   | 54.5 | 87.3 | 2004-2007    | underwent successful PCI      | in supplemental table', no access.           |
| 58 |                    |     |      |      |              | only.                         |                                              |
| 59 |                    |     |      |      |              |                               |                                              |
| 60 |                    |     |      |      |              |                               |                                              |
| 61 | Santaulari         |     |      |      |              |                               |                                              |
| 62 | <i>a et al.</i>    |     |      |      |              | AMI only, no evidence of      | Reference to cardiac medication,             |
| 63 | (2017),            | 85  | 59.6 | 84.7 | None         | revascularisation procedure.  | but no breakdown                             |
| 64 | Spain              |     |      |      | specified.   |                               |                                              |
| 65 |                    |     |      |      |              |                               |                                              |
| 66 | Seki <i>et al.</i> |     |      |      |              |                               | Reference to 'lipid-lowering drugs           |
| 67 | (2008),            | 39  | 57.8 | 83.8 | None         | AMI, PCI or CABG.             | and other medications', no                   |
| 68 | Japan              |     |      |      | specified.   |                               | breakdown.                                   |



|                                       |          |      |      |                 |                                                         |                                                                                                                              |
|---------------------------------------|----------|------|------|-----------------|---------------------------------------------------------|------------------------------------------------------------------------------------------------------------------------------|
| Toobert <i>et al.</i> (2000), USA     | 25       | 64.5 | 0    | None specified. | CAD defined as atherosclerosis, AMI, PCI or CABG.       | Anti-hypertensive and hypolipidemic medications.                                                                             |
| VHSG <i>et al.</i> (2003), Norway     | 197      | 64   | 75.8 | None specified. | AMI, unstable angina pectoris or after PCI or CABG.     | Aspirin, $\beta$ -blocker, statin, ACE inhibitor, calcium antagonist, warfarin.                                              |
| Wang <i>et al.</i> (2012), China      | 160      | 67   | 63.5 | 2005-2007       | AMI only.                                               | Anti-platelet, Nitrate, $\beta$ -blocker, ACE inhibitor, calcium antagonist, statin.                                         |
| West <i>et al.</i> (2012), UK         | 181<br>3 | 51.9 | 93.9 | 1997-2000       | AMI only.                                               | Aspirin, $\beta$ -blocker, ACE inhibitor, diuretic, long acting nitrate/ calcium channel blocker, statin, GTN.               |
| Yu <i>et al.</i> (2004), China        | 26<br>9  | 56   | 83.9 | None specified. | Recent AMI, after elective PCI or thrombolytic therapy. | Anti-platelet, $\beta$ -blocker, calcium channel blocker, nitrate, statin, ACE inhibitor, diuretic.                          |
| Zwisler <i>et al.</i> (2008), Denmark | 44<br>6  | 55.5 | 72.1 | 2000-2003       | AMI, angina pectoris or after PCI or CABG.              | Antithrombotics, lipid-lowering drugs, $\beta$ -blocker, calcium antagonists, ACE inhibitor, diuretic, long-acting nitrates. |

AMI- Acute Myocardial Infarction, CAD- Coronary Artery Disease, PCI- Percutaneous Coronary Intervention, IHD- Ischaemic Heart Disease, CABG- Coronary Artery Bypass Graft, CHD- Coronary Heart Disease, ACS- Acute Coronary Syndrome, ACE- Angiotensin-Converting-Enzyme, ARB- Angiotensin Receptor Blockers, GTN- Glyceryl Trinitrate.

**Table 3. Overview of exercise interventions**

| Reference<br>s, country                  | Exercise<br>Intervention                                                     | Modality                  | Study<br>Duratio<br>n | Session<br>Duration/Frequency/Intensity                                                                                                                                 | Additional                              |
|------------------------------------------|------------------------------------------------------------------------------|---------------------------|-----------------------|-------------------------------------------------------------------------------------------------------------------------------------------------------------------------|-----------------------------------------|
|                                          |                                                                              |                           |                       |                                                                                                                                                                         |                                         |
| Aronov <i>et al.</i> (2010), Russia      | Moderate intensity physical training (unknown setting).                      | Cycle ergometer.          | 12 months             | 45 minutes- 60 minutes/ 3 sessions per week/ 50-60% of the performed capacity by bicycle ergometry.                                                                     | None specified.                         |
| Belardinelli <i>et al.</i> (2001), Italy | Moderate intensity exercise (supervised in hospital gym).                    | Cycle ergometer.          | 6 months              | 53 minutes/ 3 sessions per week/ 60% of peak oxygen uptake (VO <sub>2</sub> Peak).                                                                                      | None specified.                         |
| Briffa <i>et al.</i> (2005), Australia   | Aerobic circuit training (supervised in hospital).                           | Aerobic circuit training. | 6 weeks               | 60-90 minutes/ 3 sessions per week/ not specified.                                                                                                                      | Education and psychosocial counselling. |
| Giallauria <i>et al.</i> (2008), Italy   | Moderate intensity exercise (supervised in centre).                          | Cycle ergometer.          | 6 months              | 40 minutes/ 3 sessions per week/ 60%-70% of peak oxygen uptake (VO <sub>2</sub> Peak).                                                                                  | None specified.                         |
| Hambrecht <i>et al.</i> (2004), Germany  | Moderate intensity exercise (supervised in hospital & unsupervised at home). | Cycle ergometer.          | 12 months             | 10 minutes- 42 sessions per week (hospital), 20 minutes- 7 sessions per week (home) plus 60 minutes' group training- 1 session per week/ 70% of symptom-limited max HR. | None specified.                         |
| Higgins <i>et al.</i> (2001), Australia  | Moderate intensity walking programme (unsupervised at home).                 | Walking.                  | Not specified.        | Not specified/ not specified/ not specified.                                                                                                                            | Psychologica<br>l plus education.       |



|    |                                   |                                                                                                                   |                                                                          |                |                                                                                                                          |                                                                     |
|----|-----------------------------------|-------------------------------------------------------------------------------------------------------------------|--------------------------------------------------------------------------|----------------|--------------------------------------------------------------------------------------------------------------------------|---------------------------------------------------------------------|
| 1  |                                   |                                                                                                                   |                                                                          |                |                                                                                                                          |                                                                     |
| 2  | Houle <i>et al.</i>               | Pedometer-based walking programme (unsupervised at home).                                                         | Walking.                                                                 | 12 months      | Not specified/ not specified/ not specified.                                                                             | Education plus socio-cognitive.                                     |
| 3  | (2012),                           |                                                                                                                   |                                                                          |                |                                                                                                                          |                                                                     |
| 4  | Canada                            |                                                                                                                   |                                                                          |                |                                                                                                                          |                                                                     |
| 5  |                                   |                                                                                                                   |                                                                          |                |                                                                                                                          |                                                                     |
| 6  | Kovoor <i>et al.</i> (2006),      | Standard Cardiac Rehabilitation programme (unknown setting).                                                      | Not specified.                                                           | 5 weeks        | Not specified/ 2-4 sessions per week/ not specified.                                                                     | Education and counselling                                           |
| 7  | Australia                         |                                                                                                                   |                                                                          |                |                                                                                                                          |                                                                     |
| 8  |                                   |                                                                                                                   |                                                                          |                |                                                                                                                          |                                                                     |
| 9  |                                   |                                                                                                                   |                                                                          |                |                                                                                                                          |                                                                     |
| 10 | Maddison <i>et al.</i> (2014),    | Automated package of text messages to increase exercise behaviour (unsupervised at home).                         | Moderate to vigorous aerobic exercise e.g. walking and household chores. | 24 weeks       | Minimum of 30 minutes/ at least 5 sessions per week/ not specified.                                                      | Optional access to other cardiac rehabilitation service or support. |
| 11 | New Zealand                       |                                                                                                                   |                                                                          |                |                                                                                                                          |                                                                     |
| 12 |                                   |                                                                                                                   |                                                                          |                |                                                                                                                          |                                                                     |
| 13 |                                   |                                                                                                                   |                                                                          |                |                                                                                                                          |                                                                     |
| 14 |                                   |                                                                                                                   |                                                                          |                |                                                                                                                          |                                                                     |
| 15 | Maroto <i>et al.</i> (2005),      | Individualised physical training (supervised in hospital gym).                                                    | Physiotherapy and aerobic training on mats or a cycle ergometer.         | 3 months       | 60 minutes/ 3 sessions per week/ 75-85% max HR.                                                                          | Psychological, education plus return to work counselling.           |
| 16 | Spain                             |                                                                                                                   |                                                                          |                |                                                                                                                          |                                                                     |
| 17 |                                   |                                                                                                                   |                                                                          |                |                                                                                                                          |                                                                     |
| 18 |                                   |                                                                                                                   |                                                                          |                |                                                                                                                          |                                                                     |
| 19 |                                   |                                                                                                                   |                                                                          |                |                                                                                                                          |                                                                     |
| 20 | Munk <i>et al.</i> (2009),        | Moderate/high intensity interval training (supervised in centre).                                                 | Cycle ergometer or running.                                              | 6 months       | 60 minutes/ 3 sessions per week/ 60-70% & 80-90% max HR.                                                                 | Spine & abdominal resistance training.                              |
| 21 | Norway                            |                                                                                                                   |                                                                          |                |                                                                                                                          |                                                                     |
| 22 |                                   |                                                                                                                   |                                                                          |                |                                                                                                                          |                                                                     |
| 23 |                                   |                                                                                                                   |                                                                          |                |                                                                                                                          |                                                                     |
| 24 | Mutwalli <i>et al.</i> (2012),    | Moderate intensity walking programme (unsupervised at home).                                                      | Walking.                                                                 | 6 months       | 30 minutes/ 7 sessions per week/ not specified.                                                                          | Education.                                                          |
| 25 | Saudi Arabia                      |                                                                                                                   |                                                                          |                |                                                                                                                          |                                                                     |
| 26 |                                   |                                                                                                                   |                                                                          |                |                                                                                                                          |                                                                     |
| 27 |                                   |                                                                                                                   |                                                                          |                |                                                                                                                          |                                                                     |
| 28 | Oerkild <i>et al.</i> (2012),     | Moderate intensity exercise (unsupervised at home).                                                               | Individualised                                                           | 12 months      | 30 minutes/ 6 sessions per week/ 11-13 on the Borg Scale.                                                                | Risk factor management .                                            |
| 29 | Denmark                           |                                                                                                                   |                                                                          |                |                                                                                                                          |                                                                     |
| 30 |                                   |                                                                                                                   |                                                                          |                |                                                                                                                          |                                                                     |
| 31 |                                   |                                                                                                                   |                                                                          |                |                                                                                                                          |                                                                     |
| 32 | Reid <i>et al.</i> (2012),        | Internet based physical activity plan and motivational tool to increase physical activity (unsupervised at home). | Not specified.                                                           | 20 weeks       | Not specified/ not specified/ not specified.                                                                             | None specified.                                                     |
| 33 | Canada                            |                                                                                                                   |                                                                          |                |                                                                                                                          |                                                                     |
| 34 |                                   |                                                                                                                   |                                                                          |                |                                                                                                                          |                                                                     |
| 35 |                                   |                                                                                                                   |                                                                          |                |                                                                                                                          |                                                                     |
| 36 |                                   |                                                                                                                   |                                                                          |                |                                                                                                                          |                                                                     |
| 37 |                                   |                                                                                                                   |                                                                          |                |                                                                                                                          |                                                                     |
| 38 |                                   |                                                                                                                   |                                                                          |                |                                                                                                                          |                                                                     |
| 39 | Santaularia <i>et al.</i> (2017), | Outpatient exercise training programme (supervised in hospital).                                                  | Cycle ergometer                                                          | 10 weeks       | 60 minutes/ 3 sessions per week/ 75-90% max HR (RPE 11-15 on Borg Scale)                                                 | Resistance training, education and risk factor management .         |
| 40 | Spain                             |                                                                                                                   |                                                                          |                |                                                                                                                          |                                                                     |
| 41 |                                   |                                                                                                                   |                                                                          |                |                                                                                                                          |                                                                     |
| 42 |                                   |                                                                                                                   |                                                                          |                |                                                                                                                          |                                                                     |
| 43 |                                   |                                                                                                                   |                                                                          |                |                                                                                                                          |                                                                     |
| 44 | Seki <i>et al.</i> (2008),        | Moderate intensity aerobic exercise (supervised in centre & unsupervised at home).                                | Walking, cycle ergometer, jogging.                                       | 6 months       | 50-110 minutes- 1 session per week (centre), ≥ 30 minutes- 2 sessions per week (home)/ 12-13 on the standard Borg scale. | Education.                                                          |
| 45 | Japan                             |                                                                                                                   |                                                                          |                |                                                                                                                          |                                                                     |
| 46 |                                   |                                                                                                                   |                                                                          |                |                                                                                                                          |                                                                     |
| 47 |                                   |                                                                                                                   |                                                                          |                |                                                                                                                          |                                                                     |
| 48 | Toobert <i>et al.</i> (2000),     | Walking or aerobics (supervised in centre & unsupervised at home).                                                | Walking or aerobics.                                                     | 24 months      | 60 minutes- 7 sessions per week (centre), 60 minutes- 3 sessions per week (home)/ Individually prescribed.               | Education and psychological support.                                |
| 49 | USA                               |                                                                                                                   |                                                                          |                |                                                                                                                          |                                                                     |
| 50 |                                   |                                                                                                                   |                                                                          |                |                                                                                                                          |                                                                     |
| 51 |                                   |                                                                                                                   |                                                                          |                |                                                                                                                          |                                                                     |
| 52 | VHSG <i>et al.</i> (2003),        | Dynamic endurance physical activity (supervised, group sessions in centre).                                       | Dynamic endurance training.                                              | 15 weeks       | 55 minutes/ 2 sessions per week/ RPE 11-13 on the Borg Scale, increased to 13-15 after 6 weeks.                          | Education and psychological support.                                |
| 53 | Norway                            |                                                                                                                   |                                                                          |                |                                                                                                                          |                                                                     |
| 54 |                                   |                                                                                                                   |                                                                          |                |                                                                                                                          |                                                                     |
| 55 |                                   |                                                                                                                   |                                                                          |                |                                                                                                                          |                                                                     |
| 56 | Wang <i>et al.</i> (2012),        | Not specified.                                                                                                    | Not specified.                                                           | Not specified. | Not specified/ not specified/ not specified.                                                                             | Education.                                                          |
| 57 | China                             |                                                                                                                   |                                                                          |                |                                                                                                                          |                                                                     |
| 58 |                                   |                                                                                                                   |                                                                          |                |                                                                                                                          |                                                                     |
| 59 |                                   |                                                                                                                   |                                                                          |                |                                                                                                                          |                                                                     |
| 60 |                                   |                                                                                                                   |                                                                          |                |                                                                                                                          |                                                                     |

|                                       |                                                                                                           |                                                                                |              |                                                                                                                         |                                       |
|---------------------------------------|-----------------------------------------------------------------------------------------------------------|--------------------------------------------------------------------------------|--------------|-------------------------------------------------------------------------------------------------------------------------|---------------------------------------|
| West <i>et al.</i> (2012), UK         | Not specified, multi-centre (supervised in centre).                                                       | Varied by centre (exercise equipment in physiotherapy gyms).                   | 6-8 weeks    | Averaged 20 hours over 6-8 weeks/ 1-2 sessions per week/ not specified.                                                 | Education plus psychological support. |
| Yu <i>et al.</i> (2004), China        | Ambulatory and aerobic cardiovascular training (supervised in hospital and centre, unsupervised at home). | Walking, treadmill, cycle ergometry, rowing, stepper, arm ergometry, dumbbell. | 8 1/2 months | 2 hours/ 2 sessions per week (centre), not specified (home)/ 65-85% of maximal aerobic capacity (VO <sub>2</sub> Peak). | Resistance training and education.    |
| Zwisler <i>et al.</i> (2008), Denmark | Intensive CR programme (supervised in centre).                                                            | Not specified.                                                                 | 6 weeks      | Not specified/ 2 sessions per week/ not specified.                                                                      | Education and psychosocial support.   |

HR- Heart Rate, VO<sub>2</sub> Peak- Peak Oxygen Uptake

## References

- World Health Organisation. Top 10 causes of death worldwide- Fact Sheet 2017. Date accessed- 29/05/2017. Available from: <http://www.who.int/mediacentre/factsheets/fs310/en/>.
- NICE. Myocardial Infarction: cardiac rehabilitation and prevention of further cardiovascular disease. 2013. Date accessed- 31/05/2017. Available from: <https://www.nice.org.uk/guidance/cg172/resources/myocardial-infarction-cardiac-rehabilitation-and-prevention-of-further-cardiovascular-disease-pdf-35109748874437>.
- BACPR. Cardiovascular Disease Prevention and Rehabilitation. 2012. Date accessed- 31/05/2017. Available from: [http://www.bacpr.com/resources/46C\\_BACPR\\_Standards\\_and\\_Core\\_Components\\_2012.pdf](http://www.bacpr.com/resources/46C_BACPR_Standards_and_Core_Components_2012.pdf).
- Piepoli MF, Corrà U, Adamopoulos S, Benzer W, Bjarnason-Wehrens B, Cupples M, et al. Secondary prevention in the clinical management of patients with cardiovascular diseases. Core components, standards and outcome measures for referral and delivery: a policy statement from the cardiac rehabilitation section of the European Association for Cardiovascular Prevention & Rehabilitation. Endorsed by the Committee for Practice Guidelines of the European Society of Cardiology. *Eur J Prev Cardiol.* 2014;21(6):664-81.
- Balady GJ, Williams MA, Ades PA, Bittner V, Comoss P, Foody JA, et al. Core components of cardiac rehabilitation/secondary prevention programs: 2007 update: a scientific statement from the American Heart Association Exercise, Cardiac Rehabilitation, and Prevention Committee, the Council on Clinical Cardiology; the Councils on Cardiovascular Nursing, Epidemiology and Prevention, and Nutrition, Physical Activity, and Metabolism; and the American Association of Cardiovascular and Pulmonary Rehabilitation. *J Cardiopulm Rehabil Prev.* 2007;27(3):121-9.
- ACPICR. Standards for Physical Activity and Exercise in the Cardiovascular Population. 2015. Date accessed- 31/05/2017. Available from: [http://acpicr.com/sites/default/files/ACPICR\\_Standards\\_2015.pdf](http://acpicr.com/sites/default/files/ACPICR_Standards_2015.pdf).
- Dalal HM, Doherty P, Taylor RS. Cardiac rehabilitation. *BMJ.* 2015;351:h5000.
- Buckley JP, Furze G, Doherty P, Speck L, Connolly S, Hinton S, et al. BACPR scientific statement: British standards and core components for cardiovascular disease prevention and rehabilitation. *Heart.* 2013;99(15):1069-71.
- Dalal HM, Zawada A, Jolly K, Moxham T, Taylor RS. Home based versus centre based cardiac rehabilitation: Cochrane systematic review and meta-analysis. *BMJ.* 2010;340:b5631.
- Anderson L, Oldridge N, Thompson DR, Zwisler AD, Rees K, Martin N, et al. Exercise-Based Cardiac Rehabilitation for Coronary Heart Disease: Cochrane Systematic Review and Meta-Analysis. *J Am Coll Cardiol.* 2016;67(1):1-12.
- Keeley EC, Boura JA, Grines CL. Primary angioplasty versus intravenous thrombolytic therapy for acute myocardial infarction: a quantitative review of 23 randomised trials. *Lancet.* 2003;361(9351):13-20.
- D'Souza SP, Mamas MA, Fraser DG, Fath-Ordoubadi F. Routine early coronary angioplasty versus ischaemia-guided angioplasty after thrombolysis in acute ST-elevation myocardial infarction: a meta-analysis. *Eur Heart J.* 2011;32(8):972-82.

13. Van de Werf F, Ardissino D, Betriu A, Cokkinos DV, Falk E, Fox KA, et al. Management of acute myocardial infarction in patients presenting with ST-segment elevation. The Task Force on the Management of Acute Myocardial Infarction of the European Society of Cardiology. *Eur Heart J.* 2003;24(1):28-66.
14. West RM, Cattle BA, Bouyssie M, Squire I, de Belder M, Fox KA, et al. Impact of hospital proportion and volume on primary percutaneous coronary intervention performance in England and Wales. *Eur Heart J.* 2011;32(6):706-11.
15. Anon. Reduction in mortality after myocardial infarction with long-term beta-adrenoceptor blockade. Multicentre international study: supplementary report. *Br Med J.* 1977;2(6084):419-21.
16. Elwood PC, Cochrane AL, Burr ML, Sweetnam PM, Williams G, Welsby E, et al. A randomized controlled trial of acetyl salicylic acid in the secondary prevention of mortality from myocardial infarction. *Br Med J.* 1974;1(5905):436-40.
17. Anon. Randomised trial of cholesterol lowering in 4444 patients with coronary heart disease: the Scandinavian Simvastatin Survival Study (4S). *Lancet.* 1994;344(8934):1383-9.
18. Anon. Indications for ACE inhibitors in the early treatment of acute myocardial infarction: systematic overview of individual data from 100,000 patients in randomized trials. ACE Inhibitor Myocardial Infarction Collaborative Group. *Circulation.* 1998;97(22):2202-12.
19. Skinner JS, Minhas R. Commentary on NICE guidance for secondary prevention for patients following a myocardial infarction. *Heart.* 2007;93(7):864-6.
20. Eisen A, Bhatt DL. Optimal duration of dual antiplatelet therapy after acute coronary syndromes and coronary stenting. *Heart.* 2016.
21. Gaziano TA, Bitton A, Anand S, Abrahams-Gessel S, Murphy A. Growing epidemic of coronary heart disease in low- and middle-income countries. *Curr Probl Cardiol.* 2010;35(2):72-115.
22. The Task Force on the Management of Acute Myocardial Infarction of the European Society of Cardiology. Acute myocardial infarction: pre-hospital and in-hospital management. The Task Force on the Management of Acute Myocardial Infarction of the European Society of Cardiology. *Eur Heart J.* 1996;17(1):43-63.
23. Wood DA DP, Poutler N, et al. Joint British recommendations on prevention of coronary heart disease in clinical practice. British Cardiac Society, British Hyperlipidaemia Association, British Hypertension Society, endorsed by the British Diabetic Association. *Heart.* 1998;80 Suppl 2:S1-29.
24. RevMan. The Nordic Cochrane Centre: The Cochrane Collaboration, version 5.3 (Review Manager)2014.
25. Higgins JP, Thompson SG, Deeks JJ, Altman DG. Measuring inconsistency in meta-analyses. *BMJ.* 2003;327(7414):557-60.
26. Higgins JP, Altman DG, Gøtzsche PC, Jüni P, Moher D, Oxman AD, et al. The Cochrane Collaboration's tool for assessing risk of bias in randomised trials. *BMJ.* 2011;343:d5928.
27. Kadda O, Kotanidou A, Manginas A, Stavridis G, Nanas S, Panagiotakos DB. Lifestyle intervention and one-year prognosis of patients following open heart surgery: a randomised clinical trial. *Journal of Clinical Nursing.* 2015;24(11-12):1611-21.
28. Santaularia N, Caminal J, Arnau A, Perramon M, Montesinos J, Abenoza Guardiola M, et al. The efficacy of a supervised exercise training programme on readmission rates in patients with myocardial ischemia: Results from a randomised controlled trial. *European Journal of Cardiovascular Nursing.* 2017;16(3):201-12.
29. Hambrecht R, Walther C, Möbius-Winkler S, Gielen S, Linke A, Conradi K, et al. Percutaneous coronary angioplasty compared with exercise training in patients with stable coronary artery disease: a randomized trial. *Circulation.* 2004;109(11):1371-8.
30. West RR, Jones DA, Henderson AH. Rehabilitation after myocardial infarction trial (RAMIT): multi-centre randomised controlled trial of comprehensive cardiac rehabilitation in patients following acute myocardial infarction. *Heart.* 2012;98(8):637-44.
31. Belardinelli R, Paolini I, Cianci G, Piva R, Georgiou D, Purcaro A. Exercise training intervention after coronary angioplasty: the ETICA trial. *J Am Coll Cardiol.* 2001;37(7):1891-900.
32. Giallauria F, Cirillo P, Lucci R, Pacileo M, De Lorenzo A, D'Agostino M, et al. Left ventricular remodelling in patients with moderate systolic dysfunction after myocardial infarction: favourable effects of exercise training and predictive role of N-terminal pro-brain natriuretic peptide. *Eur J Cardiovasc Prev Rehabil.* 2008;15(1):113-8.
33. Maroto JM, Artigao Ramirez R, Morales Durán MD, de Pablo Zarzosa C, Abreira V. [Cardiac rehabilitation in patients with myocardial infarction: a 10-year follow-up study]. *Rev Esp Cardiol.* 2005;58(10):1181-7.
34. Munk PS, Staal EM, Butt N, Isaksen K, Larsen AI. High-intensity interval training may reduce in-stent restenosis following percutaneous coronary intervention with stent implantation A randomized controlled trial evaluating the relationship to endothelial function and inflammation. *Am Heart J.* 2009;158(5):734-41.
35. Oerkild B, Frederiksen M, Hansen JF, Prescott E. Home-based cardiac rehabilitation is an attractive alternative to no cardiac rehabilitation for elderly patients with coronary heart disease: results from a randomised clinical trial. *BMJ Open.* 2012;2(6).

36. Vestfold Heartcare Study Group. Influence on lifestyle measures and five-year coronary risk by a comprehensive lifestyle intervention programme in patients with coronary heart disease. *Eur J Cardiovasc Prev Rehabil.* 2003;10(6):429-37.
37. Zwisler AD, Soja AM, Rasmussen S, Frederiksen M, Abedini S, Abadini S, et al. Hospital-based comprehensive cardiac rehabilitation versus usual care among patients with congestive heart failure, ischemic heart disease, or high risk of ischemic heart disease: 12-month results of a randomized clinical trial. *Am Heart J.* 2008;155(6):1106-13.
38. Aronov DM, Krasnitskii VB, Bubnova MG, Pozdniakov IM, Ioseliani DG, Shchegol'kov AN, et al. [Physical training at ambulatory-polyclinical stage in complex rehabilitation and secondary prevention of patients with ischemic heart disease after acute incidents. Effect on physical working capacity, hemodynamics, blood lipids, clinical course and prognosis (Russian cooperative study)]. *Kardiologiya.* 2009;49(3):49-56.
39. Briffa TG, Eckermann SD, Griffiths AD, Harris PJ, Heath MR, Freedman SB, et al. Cost-effectiveness of rehabilitation after an acute coronary event: a randomised controlled trial. *Med J Aust.* 2005;183(9):450-5.
40. Higgins HC, Hayes RL, McKenna KT. Rehabilitation outcomes following percutaneous coronary interventions (PCI). *Patient Educ Couns.* 2001;43(3):219-30.
41. Houle J, Doyon O, Vadeboncoeur N, Turbide G, Diaz A, Poirier P. Effectiveness of a pedometer-based program using a socio-cognitive intervention on physical activity and quality of life in a setting of cardiac rehabilitation. *Can J Cardiol.* 2012;28(1):27-32.
42. Kovoov P, Lee AK, Carrozzi F, Wiseman V, Byth K, Zecchin R, et al. Return to full normal activities including work at two weeks after acute myocardial infarction. *Am J Cardiol.* 2006;97(7):952-8.
43. Maddison R, Pfaeffli L, Whittaker R, Stewart R, Kerr A, Jiang Y, et al. A mobile phone intervention increases physical activity in people with cardiovascular disease: Results from the HEART randomized controlled trial. *Eur J Prev Cardiol.* 2014;22(6):701-9.
44. Mutwalli HA, Fallows SJ, Arnous AA, Zamzami MS. Randomized controlled evaluation shows the effectiveness of a home-based cardiac rehabilitation program. *Saudi Med J.* 2012;33(2):152-9.
45. Reid RD, Morrin LI, Beaton LJ, Papadakis S, Kocourek J, McDonnell L, et al. Randomized trial of an internet-based computer-tailored expert system for physical activity in patients with heart disease. *Eur J Prev Cardiol.* 2012;19(6):1357-64.
46. Seki E, Watanabe Y, Shimada K, Sunayama S, Onishi T, Kawakami K, et al. Effects of a phase III cardiac rehabilitation program on physical status and lipid profiles in elderly patients with coronary artery disease: Juntendo Cardiac Rehabilitation Program (J-CARP). *Circ J.* 2008;72(8):1230-4.
47. Toobert DJ, Glasgow RE, Radcliffe JL. Physiologic and related behavioral outcomes from the Women's Lifestyle Heart Trial. *Ann Behav Med.* 2000;22(1):1-9.
48. Wang W, Chair SY, Thompson DR, Twinn SF. Effects of home-based rehabilitation on health-related quality of life and psychological status in Chinese patients recovering from acute myocardial infarction. *Heart Lung.* 2012;41(1):15-25.
49. Yu CM, Lau CP, Chau J, McGhee S, Kong SL, Cheung BM, et al. A short course of cardiac rehabilitation program is highly cost effective in improving long-term quality of life in patients with recent myocardial infarction or percutaneous coronary intervention. *Arch Phys Med Rehabil.* 2004;85(12):1915-22.
50. Toobert DJ, Strycker LA, Glasgow RE. Lifestyle change in women with coronary heart disease: what do we know? *J Womens Health.* 1998;7(6):685-99.
51. Valkeinen H, Aaltonen S, Kujala UM. Effects of exercise training on oxygen uptake in coronary heart disease: a systematic review and meta-analysis. *Scand J Med Sci Sports.* 2010;20(4):545-55.
52. Yohannes AM, Doherty P, Bundy C, Yalfani A. The long-term benefits of cardiac rehabilitation on depression, anxiety, physical activity and quality of life. *J Clin Nurs.* 2010;19(19-20):2806-13.
53. Conraads VM, Denollet J, De Maeyer C, Van Craenenbroeck E, Verheyen J, Beckers P. Exercise training as an essential component of cardiac rehabilitation. *Heart.* 2012;98(8):674-5; author reply 5.
54. Sattelmair J, Pertman J, Ding EL, Kohl HW, Haskell W, Lee IM. Dose response between physical activity and risk of coronary heart disease: a meta-analysis. *Circulation.* 2011;124(7):789-95.
55. McGregor G, Nichols S, Hamborg T, Bryning L, Tudor-Edwards R, Markland D, et al. High-intensity interval training versus moderate-intensity steady-state training in UK cardiac rehabilitation programmes (HIIT or MISS UK): study protocol for a multicentre randomised controlled trial and economic evaluation. *BMJ Open.* 2016;6(11):e012843.

## Legends

*Figure 1.* Summary of study selection process

*Figure 2.* All-cause mortality for studies at their longest follow-up period. Filled squares represent the risk difference for individual studies at the longest reported follow-up. The boxes are proportional to the weight of each study and the lines represent their 95% confidence interval (CI). The filled diamond represents the pooled risk difference. Weights are from random effects analysis. CR-Cardiac Rehabilitation.

1 *Figure 3.* Cardiovascular mortality for studies at their longest follow-up period. Filled squares represent the risk difference for  
2 individual studies at the longest reported follow-up. The boxes are proportional to the weight of each study and the lines represent  
3 their 95% confidence interval (CI). The filled diamond represents the pooled risk difference. Weights are from random effects  
4 analysis. CR- Cardiac Rehabilitation.

5 *Figure 4.* Hospital admissions for studies at their longest follow-up period. Filled squares represent the risk difference for  
6 individual studies at the longest reported follow-up. The boxes are proportional to the weight of each study and the lines represent  
7 their 95% confidence interval (CI). The filled diamond represents the pooled risk difference. Weights are from random effects  
8 analysis. CR- Cardiac Rehabilitation.  
9

10  
11  
12  
13  
14  
15  
16  
17  
18  
19  
20  
21  
22  
23  
24  
25  
26  
27  
28  
29  
30  
31  
32  
33  
34  
35  
36  
37  
38  
39  
40  
41  
42  
43  
44  
45  
46  
47  
48  
49  
50  
51  
52  
53  
54  
55  
56  
57  
58  
59  
60

For peer review only

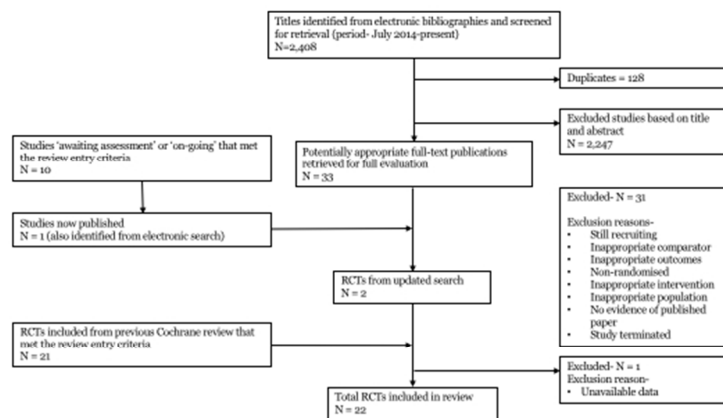

Figure 1. Summary of study selection process

338x190mm (54 x 54 DPI)

Review only

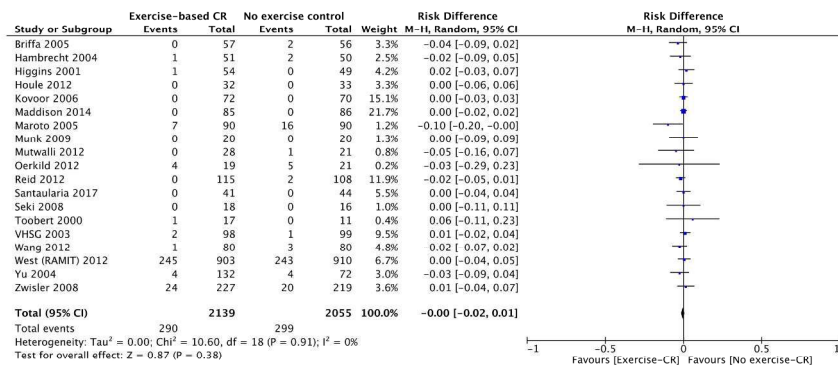

Figure 2. All-cause mortality for studies at their longest follow-up period. Filled squares represent the risk difference for individual studies at the longest reported follow-up. The boxes are proportional to the weight of each study and the lines represent their 95% confidence interval (CI). The filled diamond represents the pooled risk difference. Weights are from random effects analysis. CR- Cardiac Rehabilitation.

209x278mm (300 x 300 DPI)



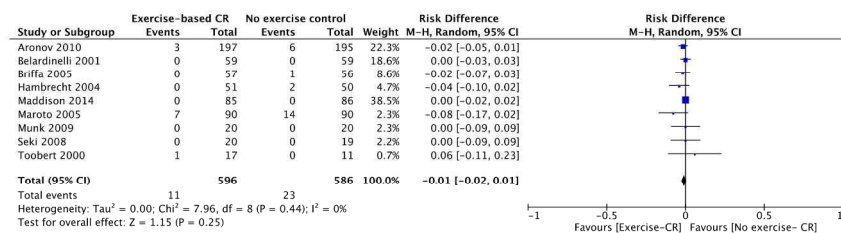

Figure 3. Cardiovascular mortality for studies at their longest follow-up period. Filled squares represent the risk difference for individual studies at the longest reported follow-up. The boxes are proportional to the weight of each study and the lines represent their 95% confidence interval (CI). The filled diamond represents the pooled risk difference. Weights are from random effects analysis. CR- Cardiac Rehabilitation.

209x278mm (300 x 300 DPI)



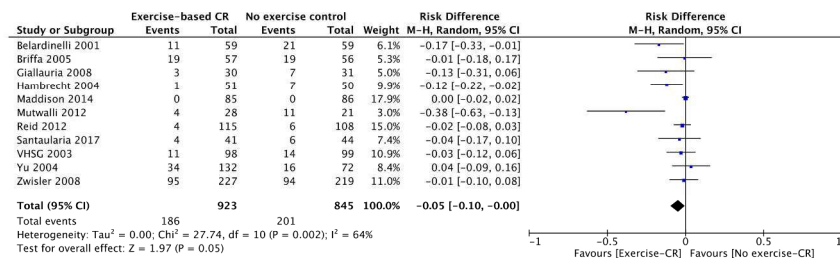

Figure 4. Hospital admissions for studies at their longest follow-up period. Filled squares represent the risk difference for individual studies at the longest reported follow-up. The boxes are proportional to the weight of each study and the lines represent their 95% confidence interval (CI). The filled diamond represents the pooled risk difference. Weights are from random effects analysis. CR- Cardiac Rehabilitation.

209x278mm (300 x 300 DPI)

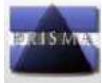

# PRISMA 2009 Checklist

1  
2  
3  
4  
5  
6  
7  
8  
9  
10  
11  
12  
13  
14  
15  
16  
17  
18  
19  
20  
21  
22  
23  
24  
25  
26  
27  
28  
29  
30  
31  
32  
33  
34  
35  
36  
37  
38  
39  
40  
41  
42  
43  
44  
45  
46  
47

| Section/topic                      | #  | Checklist item                                                                                                                                                                                                                                                                                              | Reported on page # |
|------------------------------------|----|-------------------------------------------------------------------------------------------------------------------------------------------------------------------------------------------------------------------------------------------------------------------------------------------------------------|--------------------|
| <b>TITLE</b>                       |    |                                                                                                                                                                                                                                                                                                             |                    |
| Title                              | 1  | Identify the report as a systematic review, meta-analysis, or both.                                                                                                                                                                                                                                         | 1                  |
| <b>ABSTRACT</b>                    |    |                                                                                                                                                                                                                                                                                                             |                    |
| Structured summary                 | 2  | Provide a structured summary including, as applicable: background; objectives; data sources; study eligibility criteria, participants, and interventions; study appraisal and synthesis methods; results; limitations; conclusions and implications of key findings; systematic review registration number. | 2                  |
| <b>INTRODUCTION</b>                |    |                                                                                                                                                                                                                                                                                                             |                    |
| Rationale                          | 3  | Describe the rationale for the review in the context of what is already known.                                                                                                                                                                                                                              | 3                  |
| Objectives                         | 4  | Provide an explicit statement of questions being addressed with reference to participants, interventions, comparisons, outcomes, and study design (PICOS).                                                                                                                                                  | 3                  |
| <b>METHODS</b>                     |    |                                                                                                                                                                                                                                                                                                             |                    |
| Protocol and registration          | 5  | Indicate if a review protocol exists, if and where it can be accessed (e.g., Web address), and, if available, provide registration information including registration number.                                                                                                                               | 2                  |
| Eligibility criteria               | 6  | Specify study characteristics (e.g., PICOS, length of follow-up) and report characteristics (e.g., years considered, language, publication status) used as criteria for eligibility, giving rationale.                                                                                                      | 4,5                |
| Information sources                | 7  | Describe all information sources (e.g., databases with dates of coverage, contact with study authors to identify additional studies) in the search and date last searched.                                                                                                                                  | 4                  |
| Search                             | 8  | Present full electronic search strategy for at least one database, including any limits used, such that it could be repeated.                                                                                                                                                                               | 4/appendix 1       |
| Study selection                    | 9  | State the process for selecting studies (i.e., screening, eligibility, included in systematic review, and, if applicable, included in the meta-analysis).                                                                                                                                                   | 4,5                |
| Data collection process            | 10 | Describe method of data extraction from reports (e.g., piloted forms, independently, in duplicate) and any processes for obtaining and confirming data from investigators.                                                                                                                                  | 4,5                |
| Data items                         | 11 | List and define all variables for which data were sought (e.g., PICOS, funding sources) and any assumptions and simplifications made.                                                                                                                                                                       | 4,5                |
| Risk of bias in individual studies | 12 | Describe methods used for assessing risk of bias of individual studies (including specification of whether this was done at the study or outcome level), and how this information is to be used in any data synthesis.                                                                                      | 6                  |
| Summary measures                   | 13 | State the principal summary measures (e.g., risk ratio, difference in means).                                                                                                                                                                                                                               | 5                  |
| Synthesis of results               | 14 | Describe the methods of handling data and combining results of studies, if done, including measures of consistency (e.g., $I^2$ ) for each meta-analysis.                                                                                                                                                   | 5                  |

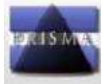

# PRISMA 2009 Checklist

Page 1 of 2

| Section/topic                 | #  | Checklist item                                                                                                                                                                                           | Reported on page # |
|-------------------------------|----|----------------------------------------------------------------------------------------------------------------------------------------------------------------------------------------------------------|--------------------|
| Risk of bias across studies   | 15 | Specify any assessment of risk of bias that may affect the cumulative evidence (e.g., publication bias, selective reporting within studies).                                                             | 5,6                |
| Additional analyses           | 16 | Describe methods of additional analyses (e.g., sensitivity or subgroup analyses, meta-regression), if done, indicating which were pre-specified.                                                         | N/A                |
| <b>RESULTS</b>                |    |                                                                                                                                                                                                          |                    |
| Study selection               | 17 | Give numbers of studies screened, assessed for eligibility, and included in the review, with reasons for exclusions at each stage, ideally with a flow diagram.                                          | 6                  |
| Study characteristics         | 18 | For each study, present characteristics for which data were extracted (e.g., study size, PICOS, follow-up period) and provide the citations.                                                             | 12-15              |
| Risk of bias within studies   | 19 | Present data on risk of bias of each study and, if available, any outcome level assessment (see item 12).                                                                                                | 5, 11,12           |
| Results of individual studies | 20 | For all outcomes considered (benefits or harms), present, for each study: (a) simple summary data for each intervention group (b) effect estimates and confidence intervals, ideally with a forest plot. | 8                  |
| Synthesis of results          | 21 | Present results of each meta-analysis done, including confidence intervals and measures of consistency.                                                                                                  | 8/figures 2,3,4    |
| Risk of bias across studies   | 22 | Present results of any assessment of risk of bias across studies (see Item 15).                                                                                                                          | 11,12              |
| Additional analysis           | 23 | Give results of additional analyses, if done (e.g., sensitivity or subgroup analyses, meta-regression [see Item 16]).                                                                                    | N/A                |
| <b>DISCUSSION</b>             |    |                                                                                                                                                                                                          |                    |
| Summary of evidence           | 24 | Summarize the main findings including the strength of evidence for each main outcome; consider their relevance to key groups (e.g., healthcare providers, users, and policy makers).                     | 8,9                |
| Limitations                   | 25 | Discuss limitations at study and outcome level (e.g., risk of bias), and at review-level (e.g., incomplete retrieval of identified research, reporting bias).                                            | 9,10               |
| Conclusions                   | 26 | Provide a general interpretation of the results in the context of other evidence, and implications for future research.                                                                                  | 10                 |
| <b>FUNDING</b>                |    |                                                                                                                                                                                                          |                    |
| Funding                       | 27 | Describe sources of funding for the systematic review and other support (e.g., supply of data); role of funders for the systematic review.                                                               | 11                 |

From: Moher D, Liberati A, Tetzlaff J, Altman DG, The PRISMA Group (2009). Preferred Reporting Items for Systematic Reviews and Meta-Analyses: The PRISMA Statement. PLoS Med 6(6): e1000097. doi:10.1371/journal.pmed1000097

For more information, visit: [www.prisma-statement.org](http://www.prisma-statement.org).

For peer review only - <http://bmjopen.bmj.com/site/about/guidelines.xhtml>

# BMJ Open

## Is exercise-based cardiac rehabilitation effective: a systematic review and meta-analysis

|                                 |                                                                                                                                                                                                                                                                                                                                                                                                                                                                                                                                                                                                                                                                                                                                                                                                                                                                          |
|---------------------------------|--------------------------------------------------------------------------------------------------------------------------------------------------------------------------------------------------------------------------------------------------------------------------------------------------------------------------------------------------------------------------------------------------------------------------------------------------------------------------------------------------------------------------------------------------------------------------------------------------------------------------------------------------------------------------------------------------------------------------------------------------------------------------------------------------------------------------------------------------------------------------|
| Journal:                        | <i>BMJ Open</i>                                                                                                                                                                                                                                                                                                                                                                                                                                                                                                                                                                                                                                                                                                                                                                                                                                                          |
| Manuscript ID                   | bmjopen-2017-019656.R1                                                                                                                                                                                                                                                                                                                                                                                                                                                                                                                                                                                                                                                                                                                                                                                                                                                   |
| Article Type:                   | Research                                                                                                                                                                                                                                                                                                                                                                                                                                                                                                                                                                                                                                                                                                                                                                                                                                                                 |
| Date Submitted by the Author:   | 01-Dec-2017                                                                                                                                                                                                                                                                                                                                                                                                                                                                                                                                                                                                                                                                                                                                                                                                                                                              |
| Complete List of Authors:       | Powell, Richard; University Hospitals Coventry and Warwickshire NHS Trust, Department of Cardiac Rehabilitation, Centre for Exercise & Health, ; University of Warwick, Warwick Clinical Trials Unit, Warwick Medical School,<br>McGregor, Gordon; University Hospitals Coventry and Warwickshire NHS Trust, Department of Cardiac Rehabilitation, Centre for Exercise & Health, ; Coventry University, Faculty of Health and Life Sciences,<br>Ennis, Stuart; University Hospitals Coventry and Warwickshire NHS Trust, Department of Cardiac Rehabilitation, Centre for Exercise & Health, ; Cardiff Metropolitan University, Cardiff Centre for Exercise & Health,<br>Kimani, Peter; University of Warwick, Statistics and Epidemiology Unit, Warwick Medical School,<br>Underwood, Martin; Warwick University, Warwick Clinical Trials Unit, Warwick Medical School, |
| <b>Primary Subject Heading</b>: | Rehabilitation medicine                                                                                                                                                                                                                                                                                                                                                                                                                                                                                                                                                                                                                                                                                                                                                                                                                                                  |
| Secondary Subject Heading:      | Cardiovascular medicine, Evidence based practice                                                                                                                                                                                                                                                                                                                                                                                                                                                                                                                                                                                                                                                                                                                                                                                                                         |
| Keywords:                       | Coronary heart disease < CARDIOLOGY, Ischaemic heart disease < CARDIOLOGY, Myocardial infarction < CARDIOLOGY, REHABILITATION MEDICINE                                                                                                                                                                                                                                                                                                                                                                                                                                                                                                                                                                                                                                                                                                                                   |
|                                 |                                                                                                                                                                                                                                                                                                                                                                                                                                                                                                                                                                                                                                                                                                                                                                                                                                                                          |

SCHOLARONE™  
Manuscripts

# Is exercise-based cardiac rehabilitation effective: a systematic review and meta-analysis

R Powell <sup>1,5\*</sup>, G McGregor <sup>1,2</sup>, S Ennis <sup>1,3</sup>, P K Kimani <sup>4</sup>, M Underwood <sup>5</sup>

<sup>1</sup> Department of Cardiac Rehabilitation, Centre for Exercise & Health, University Hospital, Coventry, CV1 3LN, UK, <sup>2</sup> Faculty of Health and Life Sciences, Coventry University, Coventry, CV1 5FB, UK, <sup>3</sup> Cardiff Centre for Exercise & Health, Cardiff Metropolitan University, Cardiff, CF5 2YB, UK <sup>4</sup> Statistics and Epidemiology Unit, Warwick Medical School, University of Warwick, Coventry, CV4 7AL, UK, <sup>5</sup> Warwick Clinical Trials Unit, Warwick Medical School, University of Warwick, Coventry, CV4 7AL, UK.

R Powell, Clinical Exercise Physiologist

G McGregor, Clinical Research Fellow

S Ennis, Clinical Exercise Physiologist

P K Kimani, Assistant Professor in Medical Statistics

M Underwood, Professor

\*Correspondence to: Richard Powell, [Richard.powell@uhcw.nhs.uk](mailto:Richard.powell@uhcw.nhs.uk)

## Word count

3716 words

## Abstract

*Objectives*

To determine the contemporary effectiveness of exercise-based Cardiac Rehabilitation (CR).

#### *Data sources*

Studies included in, or meeting the entry criteria for the 2016 Cochrane review of exercise-based CR in patients with coronary artery disease.

#### *Study eligibility criteria*

Randomised controlled trials (RCTs) of exercise-based CR vs. a no exercise control whose participants were recruited after the year 2000.

#### *Study appraisal and synthesis methods*

Two separate reviewers independently screened the characteristics of studies. One reviewer quality appraised any new studies and assessed their risk of bias using the Cochrane Collaboration's recommended risk of bias tool. Data were reported as the risk difference (95% CI).

#### *Results*

We included 22 studies with 4,834 participants (mean age 59.5 years. 78.4% male). We found no differences in outcomes between exercise-based CR and a no exercise control at their longest follow-up period for: all-cause mortality (19 studies; n=4,194; risk difference 0.00, 95% CI -0.02 to 0.01, p=0.38) or cardiovascular mortality (9 studies; n = 1,182; risk difference -0.01, 95% CI -0.02 to 0.01, p=0.25). We found a small reduction in hospital admissions of borderline statistical significance (11 studies; n= 1,768; risk difference -0.05, 95% CI -0.10 to -0.00, p=0.05).

#### *Conclusions and implications of key findings*

Our analysis indicates conclusively that the current approach to exercise-based CR has no effect on all-cause mortality or cardiovascular mortality, when compared to a no exercise control. There may be a small reduction in hospital admissions following exercise-based CR that is unlikely to be clinically important.

#### *Systematic review registration number*

Prospero: International prospective register of systematic reviews. 2017. 42017073616.  
Available from: [https://www.crd.york.ac.uk/PROSPERO/display\\_record.asp?ID=CRD42017073616](https://www.crd.york.ac.uk/PROSPERO/display_record.asp?ID=CRD42017073616)

#### ***Strengths and Limitations of this study***

- To our knowledge, this is the first systematic review of exercise-based CR that has pooled data relevant to the current medical management of patients diagnosed with coronary artery disease.
- For analysis, we present the data as the risk difference (95% CI), which ensures all studies reporting data on the outcomes of interest were included.
- This systematic review pools data from studies that deliver an intervention recognised as best practice in exercise-based CR, where multiple approaches, including educational/psychosocial components, as well as the exercise component were used.
- We have not done a de novo quality assessment of 21/22 studies included in this review and instead rely on a previous Cochrane assessment.
- We did not include health-related quality of life as an outcome measure as this is unsuitable for meta-analysis.

## Keywords

Coronary artery disease, exercise-based cardiac rehabilitation, all-cause mortality, cardiovascular mortality, hospital admissions.

## Background

Cardiovascular disease is the world's biggest killer, accounting for 15 million deaths in 2015(1).

Secondary prevention of coronary artery disease through exercise-based CR in those who have a diagnosis of coronary artery disease, has the potential to reduce mortality, reduce hospital admissions and increase quality of life. Guidelines internationally endorse the use of exercise-based CR programmes(2-5).

Typically, exercise-based CR aims to achieve 20-60 minutes of moderate intensity continuous exercise, 3-5 times a week, with muscular strength and endurance exercises prescribed in conjunction(6). Additionally, most programmes include supplementary education (coronary risk factors and cardiac misconceptions), advice on diet and access to psychological support(2, 4, 7, 8). Typically exercise-based CR is delivered in a supervised centre-based setting, although home-based programmes are used(9).

A 2016 Cochrane review (63 studies, n=14,486 participants) found benefits of exercise-based CR for patients with coronary artery disease. Both cardiovascular mortality (27 studies, RR 0.74, 95% CI 0.64 to 0.86) and hospital re-admissions were reduced (15 studies, RR 0.82, 95% CI 0.70 to 0.96), when compared to a no exercise control. However, in contrast to previous systematic reviews and meta-

1 analyses, there was no significant reduction in risk of re-infarction (36 studies, RR 0.90, 95% CI 0.79 to  
2 1.04) or all-cause mortality (47 studies, RR 0.96, 95% CI 0.88 to 1.04)(10).

3  
4 Over recent decades, the medical management of coronary artery disease has been transformed.  
5 The introduction of primary percutaneous coronary intervention has reduced short-term major adverse  
6 cardiac events and increased long-term survival(11-14). Simultaneously, there have also been widespread  
7 advances in secondary preventative medical therapy. This includes the introduction of aspirin and beta-  
8 blockers in the 1980s(15, 16), lipid-lowering statins and angiotensin converting enzyme inhibitors in the  
9 1990s(17, 18) and more recently, the introduction of clopidogrel, a secondary anti-platelet, in 2007(19,  
10 20). Age-adjusted mortality has decreased substantially in this population(21). Systematic reviews and  
11 meta-analyses that include data from older studies may not correctly assess the potential effect of  
12 exercise-based CR. We hypothesise that previous reviews have overestimated the benefit of exercise-  
13 based CR. We hypothesise that previous reviews have overestimated the benefit of exercise-  
14 based CR. We hypothesise that previous reviews have overestimated the benefit of exercise-  
15 based CR. We hypothesise that previous reviews have overestimated the benefit of exercise-  
16 based CR. We hypothesise that previous reviews have overestimated the benefit of exercise-  
17 based CR. We hypothesise that previous reviews have overestimated the benefit of exercise-  
18 based CR.

## 19 **Objectives**

20  
21  
22 To determine the contemporary effectiveness of exercise-based CR on all-cause mortality,  
23 cardiovascular mortality, and hospital readmissions in patients with coronary artery disease.

## 24 **Methods**

25  
26 We conducted and reported this meta-analysis in accordance with PRISMA (Preferred Reporting  
27 Items for Systematic Reviews and Meta-Analyses)(22).

### 28 ***Search Strategy***

29  
30 To identify relevant studies, we started with the latest Cochrane review of exercise-based CR in  
31 patients with coronary artery disease(10). Studies identified as 'awaiting assessment' or 'on-going' in this  
32 review were re-visited to establish whether publication had been reached. To identify any new studies  
33 published since the completion of the Cochrane review, an updated search was run on the 28/2/2017.  
34 This search used the same search strategies as the latest Cochrane review(10). We searched Cochrane  
35 Central Register of Controlled Trials (CENTRAL) (*appendix 1*), MEDLINE (Ovid), EMBASE (Ovid) and  
36 CINAHL (EBSCO) databases. This approach allowed us to efficiently identify all relevant studies. Where  
37 appropriate, we contacted original authors for clarification of any new included studies.

38  
39 Two separate reviewers (RP and GM) independently screened the characteristics of studies in  
40 the latest Cochrane review, studies identified as 'awaiting assessment' or 'on-going' and studies  
41 identified in the updated search. Full text publications were retrieved to allow for further examination  
42 and to verify study inclusion. Any discrepancies were resolved by a third reviewer (MU).

### 43 ***Criteria for considering studies***



1  
2  
3 In 1996, The Task Force on the Management of Acute Myocardial Infarction of the European  
4 Society of Cardiology first recommended early (within two hours) primary percutaneous interventions in  
5 preference to thrombolytic therapy for acute myocardial infarction(23). Two years later, guidelines set by  
6 the Joint British recommendations on prevention of Coronary Heart Disease in Clinical Practice were  
7 published outlining the recommendations for best practice for secondary prevention medical  
8 therapies(24). Although there have been some changes, notably the introduction of a second anti-platelet  
9 agent in the early 2000s(19, 20), the approach to secondary prevention medical therapies has not  
10 changed since then. Allowing time for implementation of these guidelines and recommendations, we  
11 identified and included studies whose participants were recruited after the year 2000, to represent a  
12 contemporary population engaging in exercise-based CR.  
13  
14  
15

16 Where there was no indication of recruitment period, the diagnosis and the secondary  
17 preventative medical therapy received by participants included in the trial determined the inclusion or  
18 exclusion of the study in the analysis.  
19  
20

### 21 ***Types of studies***

22  
23  
24 We included randomised controlled trials of exercise-based CR compared to a no exercise  
25 control with a minimum follow-up period of six months. Data reported at the longest follow-up period  
26 were included in the analysis.  
27  
28

### 29 ***Types of participants***

30  
31  
32 We used the same entry criterion as previous Cochrane reviews.  
33  
34

- 35 • People who have had a myocardial infarction, or who had undergone revascularisation  
36 (coronary artery bypass grafting or percutaneous coronary intervention) or who have  
37 angina pectoris or coronary artery disease defined by angiography.  
38  
39
- 40 • On optimal secondary preventative medical therapy defined by the Joint British  
41 recommendations on prevention of Coronary Heart Disease in Clinical Practice(24).  
42  
43
- 44 • Recruited to hospital-based, community-based or home-based CR programmes.  
45  
46

### 47 ***Types of intervention(s)***

48  
49  
50 Randomised controlled trials consisted of supervised or non-supervised exercise-based CR. The  
51 intervention was exercise alone or exercise as part of a comprehensive CR programme (consisting of  
52 educational/psychosocial components). 'No exercise control' consisted of standard medical care,  
53 including optimal secondary preventative medical therapy, education and advice about diet and exercise,  
54 psychosocial support but with no formal exercise intervention.  
55  
56  
57

## ***Types of outcome measures***

We extracted data on: all-cause mortality, cardiovascular mortality and hospital re-admissions. We did not include health-related quality of life as the authors of the 2016 Cochrane review found this unsuitable for meta-analysis.

## ***Data collection, statistical analysis and quality assessment***

We pooled data using Review Manager 5.3(25). Previous Cochrane reviews have presented the data as individual and pooled risk ratio (95% CI). Using risk ratios automatically removed studies with no events in either study arm from the analysis. Nine studies (n= 936 participants) reporting on all-cause mortality, cardiovascular mortality or hospital re-admissions, were excluded from one or more meta-analyses in the 2016 Cochrane review for this reason. We therefore present the data as the risk difference (95% CI), which ensures all studies reporting data on the outcomes of interest were included.

We applied a random-effects model to all analyses given the clinical heterogeneity of individual studies. Heterogeneity of included studies were tested statistically using the  $\chi^2$  test of heterogeneity and  $I^2$  statistic(26).

We did not repeat quality assurance checks already completed by the authors of the Cochrane review. For separate study risk of bias breakdown for these studies, we refer the reader to the existing *characteristics of studies*(10). For studies identified as 'awaiting assessment' or 'on-going' in the latest Cochrane review, or in the updated search, we quality appraised these studies and assessed their risk of bias using the Cochrane Collaboration's recommended risk of bias tool(27).

## ***Assessment of risk of bias in additional included study***

One reviewer (RP) assessed the risk of bias in any additional included studies (*table 1*). Assessment of three further quality domains as outlined in the latest Cochrane review was also conducted (Groups balanced at baseline, Intention-to-treat analysis, Groups received comparable treatment (except exercise)). A breakdown of the criteria used for assessing these three domains can be found in the latest Cochrane review. Risk of bias assessments were checked by a second reviewer (GM) and any discrepancies were resolved by a third reviewer (MU).

## ***Patient Involvement***

No patients were involved in setting the objectives or outcome measures of this review, nor were they involved in the design or implementation. No patients were involved in the analysis or interpretation of the results, nor the writing of any drafts. There are no plans to disseminate the results of the review to participants included in the studies of the review or any relevant patient networks.

## Results

### *Studies retrieved*

Of the sixty-three studies included in the Cochrane review, twenty-one studies met our entry criteria. We identified two additional relevant papers not included in the 2016 Cochrane review(28, 29). One was excluded because data for our specific research question were not available in a useable format(28). In total, twenty-two studies (n=4,834 participants) contributed to the analysis (*figure 1*). For the study identified from the updated search(29), there was a low risk of bias in all eight domains, apart from the intention-to-treat analysis, where there was no evidence of this analysis being conducted (*table 1*).

Three studies (3/22; 14%) reported on all three outcomes of interest, eleven studies (11/22; 50%) reported on two outcomes of interest and eight studies (8/22; 36%) reported on one outcome of interest.

Two studies for all-cause mortality(30, 31) and one study for cardiovascular mortality(30) reported data at varying follow-up periods (6 to 12 months; >12 to 36 months; >3 years). Data from these studies were taken at their longest follow-up period. Mean maximum follow-up period was 24.7 months. Maximum follow-up period ranged from 24 weeks to 10 years (*table 2*).

### *Flow diagram*

(*figure 1*).

### *Sample size, gender, age and study origin*

Of our twenty-two studies, ten studies were in Europe(29-38) and twelve from outside of Europe(39-50). We included a total of 4,834 participants (3,788 (78.4%) males). Four studies included males only(30, 34, 45, 47) and one study included women only(51). Participants mean age was 59.5 years. The mean age for individual studies ranged from 47.5 to 76.9 years (*table 2*).

### *Incomplete outcome data*

The majority of trials (18/22; 82%) reported complete follow-up data, regardless of participants who were lost to follow-up or who dropped out. In four studies, outcome data were incomplete for 75 (75/4,834; 1.6%) participants with no description of withdrawal or drop-out(41, 47, 48, 50).

### *Participant diagnosis of coronary artery disease and treatment received*

The diagnosis of participants recruited to the studies was described in the majority of studies (21/22; 95%). Thirteen studies enrolled participants with mixed diagnoses, including angina pectoralis or coronary artery disease defined by angiography, myocardial infarction, percutaneous coronary interventions or coronary artery bypass grafts(32, 36-42, 44, 46-48, 50). Six studies enrolled participants following acute myocardial infarction only(29, 31, 33, 34, 43, 49) and two studies enrolled

1 participants diagnosed with angina pectoralis (unstable and stable angina) only(30, 35). It was unclear  
2 from one study whether participants following myocardial infarction were included and instead, the  
3 population was defined as ‘patients after coronary artery bypass graft surgery’(45) (*table 2*).

4  
5 Six studies recruited participants following percutaneous coronary intervention only(30, 32, 33,  
6 35, 41, 46) and one study recruited participants following coronary artery bypass grafting only(45).  
7 Twelve studies included participants who had received thrombolysis, percutaneous coronary  
8 intervention, coronary artery bypass grafting and/or no revascularization procedure(31, 36-40, 42-44,  
9 47, 48, 50). Three studies did not provide any breakdown of coronary intervention or surgical procedure  
10 received by participants prior to enrollment(29, 34, 49) (*table 2*).

### 14 15 **Medication**

16  
17 A full description and breakdown of the medication received by the participants, comparable to  
18 optimal secondary prevention medical therapy defined by the Joint British recommendations on  
19 prevention of Coronary Heart Disease in Clinical Practice set in 1998(24), was provided by 13/22 studies  
20 (59%)(30-33, 35-40, 43, 49, 50). References to co-existing medical therapies were made in 7/22 (32%),  
21 but no breakdowns were provided(29, 34, 41, 42, 45-47). One study referred to the prescription of anti-  
22 hypertensive and hypolipidemic medications without reference to other recommended medications(48).  
23 One study failed to provide any description or breakdown of co-existing medical therapies(44) (*table 2*).

### 27 28 **Clearly defined recruitment period**

29  
30 Seven studies (7/22; 32%) were explicit that they recruited participants after the year 2000(36,  
31 38, 42, 44-46, 49). In three studies, participants were recruited either just before or during the year  
32 2000(30, 31, 41). Due to participant diagnosis, treatment received and co-existing medical therapies, it  
33 was agreed by all reviewers to include these studies.

34  
35 The remaining twelve studies failed to provide a recruitment period. Following further  
36 examination of the full papers, due to adequate description of patient diagnosis, treatment received and  
37 co-existing medical therapies, it was agreed by all reviewers to include these studies (*table 2*).

### 40 41 **Content of the interventions**

42  
43 The content of the interventions tested was heterogeneous with multiple approaches being  
44 adopted. Sixteen studies (16/22; 73%) compared exercise in combination with other therapies  
45 (education, psychosocial management), whilst six studies compared exercise as a stand-alone  
46 intervention, against a no exercise control. The exercise component alone varied considerably with  
47 respect to setting, training modality, duration, session length, frequency and intensity (*table 3*).

### 51 52 **Overall effects of interventions**

#### 53 54 *All-cause mortality*

1 Nineteen studies (n=4,194 participants) reported all-cause mortality (*figure 2*). There was no  
2 difference between groups at their longest follow-up (risk difference = 0.00, 95% CI -0.02 to 0.01,  
3 p=0.38). There was no evidence of statistical heterogeneity across trials (P value=0.91, I<sup>2</sup>=0%).

4  
5  
6  
7 (*figure 2*).

#### 8 9 *Cardiovascular mortality*

10  
11  
12 Nine studies (n = 1,182 participants) reported cardiovascular mortality (*figure 3*). There was no  
13 difference between groups at their longest follow-up (risk difference = -0.01, 95% CI -0.02 to 0.01,  
14 p=0.25). There was no evidence of statistical heterogeneity across trials (P value=0.44, I<sup>2</sup>=0%).

15  
16  
17 (*figure 3*).

#### 18 19 *Hospital admissions*

20  
21  
22  
23 Eleven studies (n= 1,768 participants) reported on proportion with one or more hospital  
24 admissions (*figure 4*). There was a reduction of borderline statistical significance (risk difference = -  
25 0.05, 95% CI -0.10 to -0.00, p=0.05). There was evidence of statistical heterogeneity across trials (P  
26 value=0.002, I<sup>2</sup>=64%).

27  
28  
29 (*figure 4*).

## 30 31 **Discussion**

32  
33  
34 The effectiveness of exercise-based CR in patients with coronary artery disease has been  
35 determined by Cochrane systematic reviews and meta-analyses, providing clinicians and academics with  
36 the highest level of evidence over the last 17 years(10, 52, 53). The latest Cochrane review, conducted in  
37 2016, found benefits of exercise-based CR in terms of reduced cardiovascular mortality and hospital  
38 admissions, but unlike previous Cochrane reviews, found no effect on all-cause mortality(10). We  
39 identified that data from studies included in this review dated back as far as 1975(54). By including such  
40 historical data, this Cochrane review may not be correctly assessing the potential effect of contemporary  
41 exercise-based CR.

42  
43  
44 The current review aimed to assess the effect of exercise-based CR in the era of improved  
45 reperfusion strategies and simultaneous advances in pharmacological management, by only including  
46 studies whose participants were recruited after the year 2000. The majority of interventions tested in the  
47 twenty-two included trials (*table 3*) delivered an intervention recognised as best practice in exercise-  
48 based CR, where multiple approaches, including educational/psychosocial components, as well as the  
49 exercise component were used(2, 3, 8).

50  
51  
52 The current analyses demonstrated no improvement in all-cause mortality from participation in  
53 exercise-based CR: the risk difference was 0.00 (95% CI -0.02 to 0.01). The largest trial included in our  
54 analysis, the UK-based Rehabilitation after myocardial infarction trial (RAMIT) trial, sought to show a  
55  
56  
57

1 20% reduction in relative risk based on an 11% mortality; i.e. a 2.2% risk difference(24). The limits of the  
2 95% confidence interval for the effect size in our analysis do not include the RAMIT trial's pre-specified  
3 clinically important difference. We therefore conclude that it is extremely unlikely that there is a  
4 worthwhile benefit from exercise-based CR on all-cause mortality. Furthermore, it is unlikely that future  
5 trials of similar interventions and populations, will change this conclusion. This is supported by a recent  
6 meta-analysis which included participants with other forms of atherosclerotic cardiovascular disease i.e.  
7 peripheral artery disease, ischaemic cerebrovascular accidents, diabetes and hypertension. They too  
8 found a zero effect on all-cause mortality (relative risk 1.00, 95% CI 0.88 to 1.14)(55). With the mean  
9 follow-up period for all studies included in our review being 24.7 months, it may be that any benefits on  
10 mortality will accrue over a longer follow-up. However, the absence of any kind of signal in this review  
11 means a substantial longer-term benefit is unlikely.

12 The current analyses do not quite exclude a worthwhile benefit of exercise-based CR on hospital  
13 admissions. Whilst a risk difference of -0.05 (95% CI -0.10 to -0.00) is of borderline statistical  
14 significance, it is probably clinically unimportant in the context of no change in all-cause mortality.

15 From the studies included in this review, we do not know if there is a worthwhile benefit on  
16 quality of life, as a meta-analysis was not conducted. However, the authors of the 2016 Cochrane review  
17 reported that in four of the twenty-two studies included in this review, there was a significantly higher  
18 quality of life in at least half or more of the sub-scales(32, 45, 46, 49).

19 Based on the present data, we are also unable to comment on whether exercise-based CR might  
20 be cost-effective. Five of the studies in this review included a within trial health economic evaluation(30,  
21 40, 43, 44, 50). Of these five papers, three studies showed no difference in healthcare costs between  
22 groups(40, 43, 50), one found healthcare costs to be lower for exercise-based CR(30), and one failed to  
23 report a p-value for cost difference(44). Whilst a decrease, of borderline statistical significance, in  
24 hospital admissions may improve quality of life for patients, it is unclear if this confers any economic  
25 benefit, in the absence of robust cost-effectiveness analyses.

26 It may be that exercise-based CR has an effect on other outcomes, not specifically addressed in  
27 this review, such as cardiorespiratory fitness, lifestyle risk factor management, adherence to medication,  
28 diet, smoking cessation, psychosocial health and return to work(7, 8, 56, 57). If the focus of future  
29 research is on measuring and improving these outcomes, attention will be needed to develop the best  
30 multi-component intervention.

### 31 ***Strengths and Limitations***

32 To our knowledge, this is the first systematic review of exercise-based CR that has pooled data  
33 relevant to contemporary medical management of patients diagnosed with coronary artery disease.  
34 Although we have not done a de novo quality assessment of 21/22 studies included in this review and  
35 instead are relying on a previous Cochrane assessment, it is unlikely that we would have drawn different  
36 conclusions from such an assessment(10).

37 The current review does not provide information on participant baseline characteristics. In the  
38 majority of studies (20/22; 91%), however, baseline characteristics were comparable between the  
39 intervention and control groups(10, 29).

1  
2  
3 Whilst there was no evidence of statistical heterogeneity across trials for all outcome measures  
4 (P value<0.01, I<sup>2</sup>>30%), except for hospital admissions, there was substantial context and interventional  
5 heterogeneity. The studies came from a wide range of clinical environments and countries, and the  
6 interventions delivered ranged greatly in quality. When compared with both the BACPR 'minimum  
7 standards and core components'(8) and ACPICR guidelines(6), there was considerable variation in the  
8 exercise interventions delivered (*table 3*). Critics have questioned the exercise component reported in  
9 the largest included study, the RAMIT trial (n=1813)(31). They argued that under-dosage of exercise  
10 intensity and duration may have led to the inconclusive result(58). Several other studies included in this  
11 review also fail to report on the intensity, modality and/or duration of the exercise intervention. Exercise  
12 and physical activity has a 'dose-response' relationship with cardiovascular disease risk(59). Moreover, a  
13 higher exercise capacity (VO<sub>2</sub> peak) is associated with an improvement in mortality risk(60, 61). If  
14 patients engaging in exercise-based CR do not achieve the correct dose of exercise, a physiological  
15 benefit is unlikely. It is a legitimate concern that participants in many included trials may not have  
16 received an adequate dose of exercise. In the era of contemporary medical management, higher intensity  
17 exercise protocols might be appropriate and effective(62).

18  
19 One major concern is the reporting of adherence to, and fidelity of, exercise interventions(10).  
20 Whilst the majority of studies included in this review report the intended prescription exercise dose  
21 (*table 3*), it is not possible to determine adherence and fidelity. Without basic reporting of these  
22 parameters, the actual exercise dose received cannot be quantified. This may have a significant bearing  
23 on intervention efficacy and the results of this meta-analysis.  
24  
25  
26  
27  
28

## 29 **Conclusion**

30  
31  
32 Based on the outcomes of all-cause mortality and cardiovascular mortality, our analysis  
33 indicates conclusively that the current approach to exercise-based CR has no effect when compared to a  
34 no exercise control. There may be a small reduction in hospital admissions following exercise-based CR  
35 that is unlikely to be clinically important.  
36

37 The continued delivery of exercise-based CR needs to be supported by new research to show its  
38 impact on health-related quality of life and whether it is a cost-effective intervention.  
39  
40

## 41 **Contributors**

42  
43  
44 RP and MU were principally responsible for the study concept and design. RP and GM were  
45 responsible for study selection, data extraction and risk of bias assessment. RP updated and ran the  
46 searches. RP, MU and PK were responsible for statistical analysis and interpretation of data. GM and SE  
47 provided clinical advice. RP and MU wrote the first draft of the review and all co-authors contributed to  
48 review and editing of drafts of the report. All authors approved the final manuscript. RP is the study  
49 guarantor and had full access to all trial level data in the review, takes responsibility for the integrity of  
50 the data, and accuracy of the data analysis, and had final responsibility to submit for publication.  
51  
52  
53

## 54 **Copyright**



The Corresponding Author has the right to grant on behalf of all authors and does grant on behalf of all *authors*, a worldwide license to the Publishers and its licensees in perpetuity, in all forms, formats and media (whether known now or created in the future), to i) publish, reproduce, distribute, display and store the Contribution, ii) translate the Contribution into other languages, create adaptations, reprints, include within collections and create summaries, extracts and/or, abstracts of the Contribution, iii) create any other derivative work(s) based on the Contribution, iv) to exploit all subsidiary rights in the Contribution, v) the inclusion of electronic links from the Contribution to third party material where-ever it may be located; and, vi) license any third party to do any or all of the above.

### **Funding**

This review was not funded and hence no role was played by funders in the conception, data synthesis, analysis, interpretation or in the drafting of the manuscript.

### **Competing interests**

All authors have completed the *Unified Competing Interest form* (available on request from the corresponding author) and declare: no support from any organisation for the submitted work; no financial relationships with any organisations that might have an interest in the submitted work in the previous three years, no other relationships or activities that could appear to have influenced the submitted work.

### **Ethical Approval**

Ethical approval not required.

### **Data sharing**

No additional data available.

The lead author (RP) affirms that the manuscript is an honest, accurate, and transparent account of the study being reported; that no important aspects of the study have been omitted; and that any discrepancies from the study as planned and registered have been explained.

### **Tables**

**Table 1. Risk of bias assessment for additional study**

| Santaularia <i>et al.</i> 2017 |                           |                                                                                                                                    |
|--------------------------------|---------------------------|------------------------------------------------------------------------------------------------------------------------------------|
| <b>Bias</b>                    | <b>Authors' judgement</b> | <b>Support for judgement</b>                                                                                                       |
| Random sequence                | Low risk                  | A randomisation list in blocks of ten was created by a computer random number generator. The randomisation list and the allocation |



|    |                  |           |                                                                         |
|----|------------------|-----------|-------------------------------------------------------------------------|
| 1  | generation       |           | of patients to each group were independently controlled by the Clinical |
| 2  | (selection bias) |           | Trials Unit.'                                                           |
| 3  |                  |           |                                                                         |
| 4  | Allocation       |           | A randomisation list in blocks of ten was created by a computer         |
| 5  | concealment      |           | random number generator. The randomisation list and the allocation      |
| 6  | (selection bias) | Low risk  | of patients to each group were independently controlled by the Clinical |
| 7  |                  |           | Trials Unit.'                                                           |
| 8  | Blinding of      |           |                                                                         |
| 9  | outcome          |           | An independent committee that was blind to the patients' treatment      |
| 10 | assessment       |           | group assessed the main outcomes. This committee comprised a            |
| 11 | (detection bias) | Low risk  | cardiologist, a rehabilitation cardiologist and a health information    |
| 12 | All outcomes     |           | manager, all from different centres.'                                   |
| 13 | Incomplete       |           |                                                                         |
| 14 | outcome data     |           |                                                                         |
| 15 | (attrition bias) | Low risk  | There was no loss to follow-up.                                         |
| 16 | All outcomes     |           |                                                                         |
| 17 | Selective        |           | All outcomes described in the methods were reported in the results.     |
| 18 | reporting        | Low risk  | Results regarding quality of life are presented in supplementary data   |
| 19 | (reporting bias) |           | but were not required for the current review.                           |
| 20 | Groups           |           |                                                                         |
| 21 | balanced at      | Low risk  | No significant differences between groups were observed, with the       |
| 22 | baseline         |           | exception of gender: 23% of the control group were women compared       |
| 23 |                  |           | with 7% in the intervention group ( $p=0.049$ ).                        |
| 24 | Intention-to-    |           |                                                                         |
| 25 | treat analysis   | High risk | No analysis was conducted.                                              |
| 26 | conducted        |           |                                                                         |
| 27 | Groups received  |           |                                                                         |
| 28 | same treatment   | Low risk  | Patients assigned to the control group received standard care given at  |
| 29 | (apart from the  |           | the hospital'. In addition to standard care, patients randomised to the |
| 30 | intervention)    |           | intervention group....'                                                 |

**Table 2. Overview of participants, recruitment period, patient diagnosis and medical therapy**

| Reference<br>s, country                           | N   | Mean<br>age<br>(year<br>s) | Male<br>participan<br>ts (%) | Recruitme<br>nt period<br>(years) | Maximu<br>m<br>follow-<br>up<br>period | Patient diagnosis                                                                                 | Medication                                                                                                                                                                        |
|---------------------------------------------------|-----|----------------------------|------------------------------|-----------------------------------|----------------------------------------|---------------------------------------------------------------------------------------------------|-----------------------------------------------------------------------------------------------------------------------------------------------------------------------------------|
| Aronov <i>et al.</i> (2010),<br>Russia            | 392 | 61.4                       | 73.5                         | None<br>specified                 | 1 year                                 | AMI, stable angina,<br>unstable angina or<br>myocardial<br>revascularisation.                     | Standard medical therapy-<br>$\beta$ -blocker, acetylsalicyclic<br>acid or other<br>antithrombotic drug,<br>nitrate, ACE inhibitor.<br>Some patients on lipid-<br>lowering drugs. |
| Belardinelli<br><i>et al.</i><br>(2001),<br>Italy | 118 | 61                         | 100                          | None<br>specified                 | 33<br>months                           | CAD including AMI.<br>Successful PCI in 1 or<br>2 native epicardial<br>coronary arteries<br>only. | According to international<br>accepted protocols-<br>aspirin, ticlopidine,<br>calcium antagonists,<br>nitrates.                                                                   |
| Briffa <i>et al.</i><br>(2005),<br>Australia      | 113 | 47.5                       | 89.5                         | None<br>specified.                | 1 year                                 | Uncomplicated AMI<br>or recovery from<br>unstable angina. PCI,<br>CABG, thrombolytic<br>therapy.  | Aspirin, antiarrhythmic<br>agent, $\beta$ -blocker, ACE<br>inhibitor, calcium<br>antagonist, long acting<br>nitrate, diuretic.                                                    |

|    |                       |     |      |      |            |                        |                                          |
|----|-----------------------|-----|------|------|------------|------------------------|------------------------------------------|
| 1  |                       |     |      |      |            | 6 months               |                                          |
| 2  | Giallauria            |     |      |      |            | AMI and undergone      |                                          |
| 3  | <i>et al.</i>         |     |      |      | None       | primary or rescue      | Aspirin, $\beta$ -blocker, ACE           |
| 4  | (2008),               | 61  | 58.5 | 78.5 | specified. | PCI only.              | inhibitor, ARB, statin.                  |
| 5  | Italy                 |     |      |      |            |                        |                                          |
| 6  |                       |     |      |      |            | 1 year                 |                                          |
| 7  | Hambrecht             |     |      |      |            | Stable CAD defined     | $\beta$ -receptor antagonists, $\beta$ - |
| 8  | <i>et al.</i>         |     |      |      |            | by angina pectoralis   | HMG-CoA reductase                        |
| 9  | (2004),               | 101 | 56   | 87.3 | 1997-2001  | and amenable to PCI.   | inhibitors, ACE inhibitor,               |
| 10 | Germany               |     |      |      |            | AMI patients           | acetylsalicylic acid.                    |
| 11 |                       |     |      |      |            | 51 weeks               |                                          |
| 12 | Higgins <i>et al.</i> |     |      |      |            | Post-PCI patients      | Reference to medical                     |
| 13 | (2001),               | 105 | 60.8 | 81.3 | 1995-1997  | only. No AMI 1         | therapy, only breakdown                  |
| 14 | Australia             |     |      |      |            | month pre-             | for lipid lowering                       |
| 15 |                       |     |      |      |            | procedure.             | medication.                              |
| 16 |                       |     |      |      |            | 12 months              |                                          |
| 17 |                       |     |      |      |            | Patients hospitalised  |                                          |
| 18 | Houle <i>et al.</i>   |     |      |      |            | for an ACS (unstable   | Reference to medication in               |
| 19 | (2012),               | 65  | 51.5 | 100  | 2007-2008  | angina, non-ST-        | usual care group, but no                 |
| 20 | Canada                |     |      |      |            | elevation or ST        | breakdown.                               |
| 21 |                       |     |      |      |            | elevation MI). PCI,    |                                          |
| 22 |                       |     |      |      |            | CABG or no             |                                          |
| 23 |                       |     |      |      |            | revascularisation      |                                          |
| 24 |                       |     |      |      |            | procedure.             |                                          |
| 25 |                       |     |      |      |            | 6 months               |                                          |
| 26 |                       |     |      |      |            | AMI only.              |                                          |
| 27 |                       |     |      |      |            | Thrombolytic           | Aspirin, $\beta$ -blocker, ACE           |
| 28 |                       |     |      |      |            | therapy, one patient   | inhibitor, calcium channel               |
| 29 |                       |     |      |      |            | in the exercise        | blockers, nitrates,                      |
| 30 |                       |     |      |      |            | treatment group had    | cholesterol-lowering                     |
| 31 |                       |     |      |      |            | primary angioplasty.   | agents,                                  |
| 32 |                       |     |      |      |            | 24 weeks               |                                          |
| 33 |                       |     |      |      |            | Diagnosis of IHD       |                                          |
| 34 |                       |     |      |      |            | (angina, MI,           |                                          |
| 35 |                       |     |      |      |            | revascularisation,     |                                          |
| 36 |                       |     |      |      |            | including              |                                          |
| 37 |                       |     |      |      |            | angioplasty, stent, or |                                          |
| 38 |                       |     |      |      |            | CABG).                 | No description.                          |
| 39 |                       |     |      |      |            | 10 years               |                                          |
| 40 |                       |     |      |      |            | (None                  | Medication regimens                      |
| 41 |                       |     |      |      |            | specified) 2           | employed in secondary                    |
| 42 |                       |     |      |      |            | year                   | prevention at discharge                  |
| 43 |                       |     |      |      |            | enrollment             | were clearly insufficient by             |
| 44 |                       |     |      |      |            | period.                | standard criteria but                    |
| 45 |                       |     |      |      |            |                        | currently meet Spanish                   |
| 46 |                       |     |      |      |            |                        | and European guidelines'.                |
| 47 |                       |     |      |      |            | 6 months               |                                          |
| 48 |                       |     |      |      |            | Stable angina and      |                                          |
| 49 |                       |     |      |      |            | unstable angina, post  | Aspirin, $\beta$ -blocker, ACE           |
| 50 |                       |     |      |      |            | PCI only. AMI          | inhibitor, ARB, statin,                  |
| 51 |                       |     |      |      |            | patients excluded.     | acetylsalicylic acid.                    |
| 52 |                       |     |      |      |            | 6 months               |                                          |
| 53 |                       |     |      |      |            | Undergone CABG         | Participants received                    |
| 54 |                       |     |      |      |            | surgery. Unknown       | advice that focused on                   |
| 55 |                       |     |      |      |            | whether AMI            | medications', no                         |
| 56 |                       |     |      |      |            | patients included.     | breakdown.                               |
| 57 |                       |     |      |      |            | 12 months              |                                          |
| 58 |                       |     |      |      |            | Recent coronary        |                                          |
| 59 |                       |     |      |      |            | event defined as       | $\beta$ -blocker, antithrombotics,       |
| 60 |                       |     |      |      |            | AMI, PCI, CABG or      | calcium antagonists, lipid-              |
|    |                       |     |      |      |            | without invasive       | lowering agents, diuretics.              |
|    |                       |     |      |      |            | procedure.             |                                          |
|    |                       |     |      |      |            | 12 months              |                                          |
|    |                       |     |      |      |            | ACS including AMI,     | Reference to a 'descriptive              |
|    |                       |     |      |      |            | underwent successful   | summary in supplemental                  |
|    |                       |     |      |      |            | PCI only.              | table', no access.                       |
|    |                       |     |      |      |            | 12 months              |                                          |
|    |                       |     |      |      |            | AMI only, no           | Reference to cardiac                     |
|    |                       |     |      |      |            | evidence of            | medication, but no                       |
|    |                       |     |      |      |            | revascularisation      | breakdown                                |

|    |                       |     |      |      |            |                   |                                    |
|----|-----------------------|-----|------|------|------------|-------------------|------------------------------------|
| 1  | Spain                 |     |      |      |            |                   | procedure.                         |
| 2  |                       |     |      |      |            |                   |                                    |
| 3  |                       |     |      |      |            |                   |                                    |
| 4  |                       |     |      |      |            | NR                | Reference to 'lipid-               |
| 5  | Seki <i>et al.</i>    |     |      |      |            |                   | lowering drugs and other           |
| 6  | (2008),               | 39  | 57.8 | 83.8 | None       |                   | medications', no                   |
| 7  | Japan                 |     |      |      | specified. | AMI, PCI or CABG. | breakdown.                         |
| 8  |                       |     |      |      |            |                   |                                    |
| 9  | Toobert <i>et al.</i> |     |      |      |            | 24                | CAD defined as                     |
| 10 | (2000),               | 25  | 64.5 | 0    | None       | months            | atherosclerosis, AMI,              |
| 11 | USA                   |     |      |      | specified. |                   | PCI or CABG.                       |
| 12 |                       |     |      |      |            |                   | Anti-hypertensive and              |
| 13 | VHSG <i>et al.</i>    |     |      |      |            | 2 years           | hypolipidemic                      |
| 14 | (2003),               | 197 | 64   | 75.8 | None       |                   | medications.                       |
| 15 | Norway                |     |      |      | specified. |                   | Aspirin, $\beta$ -blocker, statin, |
| 16 |                       |     |      |      |            |                   | ACE inhibitor, calcium             |
| 17 | Wang <i>et al.</i>    |     |      |      |            | 6 months          | antagonist, warfarin.              |
| 18 | (2012),               | 160 | 67   | 63.5 | 2005-2007  |                   | Anti-platelet, Nitrate, $\beta$ -  |
| 19 | China                 |     |      |      |            |                   | blocker, ACE inhibitor,            |
| 20 |                       |     |      |      |            |                   | calcium antagonist, statin.        |
| 21 |                       |     |      |      |            | 7 to 9            | Aspirin, $\beta$ -blocker, ACE     |
| 22 | West <i>et al.</i>    | 181 |      |      |            | years             | inhibitor, diuretic, long          |
| 23 | (2012), UK            | 3   | 51.9 | 93.9 | 1997-2000  |                   | acting nitrate/ calcium            |
| 24 |                       |     |      |      |            |                   | channel blocker, statin,           |
| 25 |                       |     |      |      |            |                   | GTN.                               |
| 26 |                       |     |      |      |            |                   |                                    |
| 27 |                       |     |      |      |            | 2 years           | Anti-platelet, $\beta$ -blocker,   |
| 28 | Yu <i>et al.</i>      |     |      |      |            |                   | calcium channel blocker,           |
| 29 | (2004),               | 269 | 56   | 83.9 | None       |                   | nitrate, statin, ACE               |
| 30 | China                 |     |      |      | specified. |                   | inhibitor, diuretic.               |
| 31 |                       |     |      |      |            | 1 year            | Antithrombotics, lipid-            |
| 32 | Zwisler <i>et al.</i> |     |      |      |            |                   | lowering drugs, $\beta$ -blocker,  |
| 33 | (2008),               | 446 | 55.5 | 72.1 | 2000-2003  |                   | calcium antagonists, ACE           |
| 34 | Denmark               |     |      |      |            |                   | inhibitor, diuretic, long-         |
| 35 |                       |     |      |      |            |                   | acting nitrates.                   |

AMI- Acute Myocardial Infarction, CAD- Coronary Artery Disease, PCI- Percutaneous Coronary Intervention, IHD- Ischaemic Heart Disease, CABG- Coronary Artery Bypass Graft, CHD- Coronary Heart Disease, ACS- Acute Coronary Syndrome, ACE- Angiotensin-Converting-Enzyme, ARB- Angiotensin Receptor Blockers, GTN- Glyceryl Trinitrate.

**Table 3. Overview of exercise interventions**

| Reference<br>s, country                        | Exercise<br>Intervention                                        | Study<br>Duration            |              |                                                                                                           |                                                  | Additional |
|------------------------------------------------|-----------------------------------------------------------------|------------------------------|--------------|-----------------------------------------------------------------------------------------------------------|--------------------------------------------------|------------|
|                                                |                                                                 | Exercise                     | Modality     | Duration                                                                                                  | Session<br>Duration/Frequency/Intensity          |            |
| Aronov <i>et al.</i> (2010),<br>Russia         | Moderate intensity<br>physical training<br>(unknown setting).   | Cycle<br>ergometer.          | 12<br>months | 45 minutes- 60 minutes/ 3 sessions<br>per week/ 50-60% of the performed<br>capacity by bicycle ergometry. | None<br>specified.                               |            |
| Belardinelli<br><i>et al.</i><br>(2001), Italy | Moderate intensity<br>exercise (supervised in<br>hospital gym). | Cycle<br>ergometer.          | 6 months     | 53 minutes/ 3 sessions per week/<br>60% of peak oxygen uptake (VO <sub>2</sub><br>Peak).                  | None<br>specified.                               |            |
| Briffa <i>et al.</i><br>(2005),<br>Australia   | Aerobic circuit training<br>(supervised in<br>hospital).        | Aerobic circuit<br>training. | 6 weeks      | 60-90 minutes/ 3 sessions per week/<br>not specified.                                                     | Education<br>and<br>psychosocial<br>counselling. |            |
| Giallauria <i>et al.</i> (2008),<br>Italy      | Moderate intensity<br>exercise (supervised in<br>centre).       | Cycle<br>ergometer.          | 6 months     | 40 minutes/ 3 sessions per week/<br>60%-70% of peak oxygen uptake (VO <sub>2</sub><br>Peak).              | None<br>specified.                               |            |
| Hambrecht<br><i>et al.</i>                     | Moderate intensity<br>exercise (supervised in                   | Cycle<br>ergometer.          | 12<br>months | 10 minutes- 42 sessions per week<br>(hospital), 20 minutes- 7 sessions per                                | None<br>specified.                               |            |

|    |                                                   |                                                                                                                                  |                                                                                          |                   |                                                                                                                                   |                                                                                     |
|----|---------------------------------------------------|----------------------------------------------------------------------------------------------------------------------------------|------------------------------------------------------------------------------------------|-------------------|-----------------------------------------------------------------------------------------------------------------------------------|-------------------------------------------------------------------------------------|
| 1  | (2004),<br>Germany                                | hospital &<br>unsupervised at home).                                                                                             |                                                                                          |                   | week (home) plus 60 minutes' group<br>training- 1 session per week/ 70% of<br>symptom-limited max HR.                             |                                                                                     |
| 2  |                                                   |                                                                                                                                  |                                                                                          |                   |                                                                                                                                   |                                                                                     |
| 3  |                                                   |                                                                                                                                  |                                                                                          |                   |                                                                                                                                   |                                                                                     |
| 4  |                                                   |                                                                                                                                  |                                                                                          |                   |                                                                                                                                   |                                                                                     |
| 5  | Higgins <i>et al.</i> (2001),<br>Australia        | Moderate intensity<br>walking programme<br>(unsupervised at<br>home).                                                            | Walking.                                                                                 | Not<br>specified. | Not specified/ not specified/ not<br>specified.                                                                                   | Psychologica<br>l plus<br>education.                                                |
| 6  |                                                   |                                                                                                                                  |                                                                                          |                   |                                                                                                                                   |                                                                                     |
| 7  |                                                   |                                                                                                                                  |                                                                                          |                   |                                                                                                                                   |                                                                                     |
| 8  |                                                   |                                                                                                                                  |                                                                                          |                   |                                                                                                                                   |                                                                                     |
| 9  | Houle <i>et al.</i><br>(2012),<br>Canada          | Pedometer-based<br>walking programme<br>(unsupervised at<br>home).                                                               | Walking.                                                                                 | 12<br>months      | Not specified/ not specified/ not<br>specified.                                                                                   | Education<br>plus socio-<br>cognitive.                                              |
| 10 |                                                   |                                                                                                                                  |                                                                                          |                   |                                                                                                                                   |                                                                                     |
| 11 |                                                   |                                                                                                                                  |                                                                                          |                   |                                                                                                                                   |                                                                                     |
| 12 |                                                   |                                                                                                                                  |                                                                                          |                   |                                                                                                                                   |                                                                                     |
| 13 | Kovoor <i>et al.</i> (2006),<br>Australia         | Standard Cardiac<br>Rehabilitation<br>programme (unknown<br>setting).                                                            | Not specified.                                                                           | 5 weeks           | Not specified/ 2-4 sessions per week/<br>not specified.                                                                           | Education<br>and<br>counselling                                                     |
| 14 |                                                   |                                                                                                                                  |                                                                                          |                   |                                                                                                                                   |                                                                                     |
| 15 |                                                   |                                                                                                                                  |                                                                                          |                   |                                                                                                                                   |                                                                                     |
| 16 |                                                   |                                                                                                                                  |                                                                                          |                   |                                                                                                                                   |                                                                                     |
| 17 | Maddison <i>et al.</i> (2014),<br>New<br>Zealand  | Automated package of<br>text messages to<br>increase exercise<br>behaviour<br>(unsupervised at<br>home).                         | Moderate to<br>vigourous<br>aerobic exercise<br>e.g. walking and<br>household<br>chores. | 24 weeks          | Minimum of 30 minutes/ at least 5<br>sessions per week/ not specified.                                                            | Optional<br>access to<br>other cardiac<br>rehabilitatio<br>n service or<br>support. |
| 18 |                                                   |                                                                                                                                  |                                                                                          |                   |                                                                                                                                   |                                                                                     |
| 19 |                                                   |                                                                                                                                  |                                                                                          |                   |                                                                                                                                   |                                                                                     |
| 20 |                                                   |                                                                                                                                  |                                                                                          |                   |                                                                                                                                   |                                                                                     |
| 21 |                                                   |                                                                                                                                  |                                                                                          |                   |                                                                                                                                   |                                                                                     |
| 22 |                                                   |                                                                                                                                  |                                                                                          |                   |                                                                                                                                   |                                                                                     |
| 23 | Maroto <i>et al.</i> (2005),<br>Spain             | Individualised physical<br>training (supervised in<br>hospital gym).                                                             | Physiotherapy<br>and aerobic<br>training on mats<br>or a cycle<br>ergometer.             | 3 months          | 60 minutes/ 3 sessions per week/ 75-<br>85% max HR.                                                                               | Psychologica<br>l, education<br>plus return<br>to work<br>counselling.              |
| 24 |                                                   |                                                                                                                                  |                                                                                          |                   |                                                                                                                                   |                                                                                     |
| 25 |                                                   |                                                                                                                                  |                                                                                          |                   |                                                                                                                                   |                                                                                     |
| 26 |                                                   |                                                                                                                                  |                                                                                          |                   |                                                                                                                                   |                                                                                     |
| 27 |                                                   |                                                                                                                                  |                                                                                          |                   |                                                                                                                                   |                                                                                     |
| 28 | Munk <i>et al.</i><br>(2009),<br>Norway           | Moderate/high<br>intensity interval<br>training (supervised in<br>centre).                                                       | Cycle ergometer<br>or running.                                                           | 6 months          | 60 minutes/ 3 sessions per week/ 60-<br>70% & 80-90% max HR.                                                                      | Spine &<br>abdominal<br>resistance<br>training.                                     |
| 29 |                                                   |                                                                                                                                  |                                                                                          |                   |                                                                                                                                   |                                                                                     |
| 30 |                                                   |                                                                                                                                  |                                                                                          |                   |                                                                                                                                   |                                                                                     |
| 31 | Mutwalli <i>et al.</i> (2012),<br>Saudi<br>Arabia | Moderate intensity<br>walking programme<br>(unsupervised at<br>home).                                                            | Walking.                                                                                 | 6 months          | 30 minutes/ 7 sessions per week/ not<br>specified.                                                                                | Education.                                                                          |
| 32 |                                                   |                                                                                                                                  |                                                                                          |                   |                                                                                                                                   |                                                                                     |
| 33 |                                                   |                                                                                                                                  |                                                                                          |                   |                                                                                                                                   |                                                                                     |
| 34 |                                                   |                                                                                                                                  |                                                                                          |                   |                                                                                                                                   |                                                                                     |
| 35 |                                                   |                                                                                                                                  |                                                                                          |                   |                                                                                                                                   |                                                                                     |
| 36 | Oerkild <i>et al.</i> (2012),<br>Denmark          | Moderate intensity<br>exercise (unsupervised<br>at home).                                                                        | Individualised                                                                           | 12<br>months      | 30 minutes/ 6 sessions per week/ 11-<br>13 on the Borg Scale.                                                                     | Risk factor<br>management<br>.                                                      |
| 37 |                                                   |                                                                                                                                  |                                                                                          |                   |                                                                                                                                   |                                                                                     |
| 38 |                                                   |                                                                                                                                  |                                                                                          |                   |                                                                                                                                   |                                                                                     |
| 39 | Reid <i>et al.</i><br>(2012),<br>Canada           | Internet based physical<br>activity plan and<br>motivational tool to<br>increase physical<br>activity (unsupervised<br>at home). | Not specified.                                                                           | 20 weeks          | Not specified/ not specified/ not<br>specified.                                                                                   | None<br>specified.                                                                  |
| 40 |                                                   |                                                                                                                                  |                                                                                          |                   |                                                                                                                                   |                                                                                     |
| 41 |                                                   |                                                                                                                                  |                                                                                          |                   |                                                                                                                                   |                                                                                     |
| 42 |                                                   |                                                                                                                                  |                                                                                          |                   |                                                                                                                                   |                                                                                     |
| 43 |                                                   |                                                                                                                                  |                                                                                          |                   |                                                                                                                                   |                                                                                     |
| 44 |                                                   |                                                                                                                                  |                                                                                          |                   |                                                                                                                                   |                                                                                     |
| 45 |                                                   |                                                                                                                                  |                                                                                          |                   |                                                                                                                                   |                                                                                     |
| 46 | Santaularia<br><i>et al.</i><br>(2017),<br>Spain  | Outpatient exercise<br>training programme<br>(supervised in<br>hospital).                                                        | Cycle ergometer                                                                          | 10 weeks          | 60 minutes/ 3 sessions per week/ 75-<br>90% max HR (RPE 11-15 on Borg<br>Scale)                                                   | Resistance<br>training,<br>education<br>and risk<br>factor<br>management<br>.       |
| 47 |                                                   |                                                                                                                                  |                                                                                          |                   |                                                                                                                                   |                                                                                     |
| 48 |                                                   |                                                                                                                                  |                                                                                          |                   |                                                                                                                                   |                                                                                     |
| 49 |                                                   |                                                                                                                                  |                                                                                          |                   |                                                                                                                                   |                                                                                     |
| 50 |                                                   |                                                                                                                                  |                                                                                          |                   |                                                                                                                                   |                                                                                     |
| 51 | Seki <i>et al.</i><br>(2008),<br>Japan            | Moderate intensity<br>aerobic exercise<br>(supervised in centre &<br>unsupervised at home).                                      | Walking, cycle<br>ergometer,<br>jogging.                                                 | 6 months          | 50-110 minutes- 1 session per week<br>(centre), ≥ 30 minutes- 2 sessions per<br>week (home)/ 12-13 on the standard<br>Borg scale. | Education.                                                                          |
| 52 |                                                   |                                                                                                                                  |                                                                                          |                   |                                                                                                                                   |                                                                                     |
| 53 |                                                   |                                                                                                                                  |                                                                                          |                   |                                                                                                                                   |                                                                                     |
| 54 |                                                   |                                                                                                                                  |                                                                                          |                   |                                                                                                                                   |                                                                                     |
| 55 | Toobert <i>et al.</i> (2000),<br>USA              | Walking or aerobics<br>(supervised in centre &<br>unsupervised at home).                                                         | Walking or<br>aerobics.                                                                  | 24<br>months      | 60 minutes- 7 sessions per week<br>(centre), 60 minutes- 3 sessions per<br>week (home)/ Individually<br>prescribed.               | Education<br>and<br>psychologica<br>l support.                                      |
| 56 |                                                   |                                                                                                                                  |                                                                                          |                   |                                                                                                                                   |                                                                                     |
| 57 |                                                   |                                                                                                                                  |                                                                                          |                   |                                                                                                                                   |                                                                                     |
| 58 |                                                   |                                                                                                                                  |                                                                                          |                   |                                                                                                                                   |                                                                                     |
| 59 |                                                   |                                                                                                                                  |                                                                                          |                   |                                                                                                                                   |                                                                                     |
| 60 |                                                   |                                                                                                                                  |                                                                                          |                   |                                                                                                                                   |                                                                                     |

|    |                    |                         |                  |            |                                        |              |
|----|--------------------|-------------------------|------------------|------------|----------------------------------------|--------------|
| 1  |                    |                         |                  |            |                                        |              |
| 2  |                    |                         |                  |            |                                        |              |
| 3  | VHSG <i>et al.</i> | Dynamic endurance       | Dynamic          |            |                                        | Education    |
| 4  | (2003),            | physical activity       | endurance        |            | 55 minutes/ 2 sessions per week/       | and          |
| 5  | Norway             | (supervised, group      | training.        | 15 weeks   | RPE 11-13 on the Borg Scale,           | psychologica |
| 6  |                    | sessions in centre).    |                  |            | increased to 13-15 after 6 weeks.      | l support.   |
| 7  | Wang <i>et al.</i> |                         |                  |            |                                        |              |
| 8  | (2012),            | Not specified.          | Not specified.   | Not        | Not specified/ not specified/ not      | Education.   |
| 9  | China              |                         |                  | specified. | specified.                             |              |
| 10 |                    |                         | Varied by centre |            |                                        |              |
| 11 |                    |                         | (exercise        |            |                                        | Education    |
| 12 | West <i>et al.</i> | Not specified, multi-   | equipment in     |            |                                        | plus         |
| 13 | (2012), UK         | centre (supervised in   | physiotherapy    | 6-8        | Averaged 20 hours over 6-8 weeks/ 1-   | psychologica |
| 14 |                    | centre).                | gyms).           | weeks      | 2 sessions per week/ not specified.    | l support.   |
| 15 |                    |                         | Walking,         |            |                                        |              |
| 16 |                    | Ambulatory and          | treadmill, cycle |            |                                        |              |
| 17 | Yu <i>et al.</i>   | aerobic cardiovascular  | ergometry,       |            | 2 hours/ 2 sessions per week (centre), | Resistance   |
| 18 | (2004),            | training (supervised in | rowing, stepper, |            | not specified (home)/ 65-85% of        | training and |
| 19 | China              | hospital and centre,    | arm ergometry,   | 8 1/2      | maximal aerobic capacity (VO2          | education.   |
| 20 |                    | unsupervised at home).  | dumbbell.        | months     | Peak).                                 |              |
| 21 | Zwisler <i>et</i>  | Intensive CR            |                  |            |                                        | Education    |
| 22 | <i>al.</i> (2008), | programme               |                  |            | Not specified/ 2 sessions per week/    | and          |
| 23 | Denmark            | (supervised in centre). | Not specified.   | 6 weeks    | not specified.                         | psychosocial |
| 24 |                    |                         |                  |            |                                        | support.     |

HR- Heart Rate, VO<sub>2</sub> Peak- Peak Oxygen Uptake

## References

1. World Health Organisation. Top 10 causes of death worldwide- Fact Sheet 2017 29/05/2017. Available from: <http://www.who.int/mediacentre/factsheets/fs310/en/>.
2. NICE. Myocardial Infarction: cardiac rehabilitation and prevention of further cardiovascular disease 2013 31/05/2017. Available from: <https://www.nice.org.uk/guidance/cg172/resources/myocardial-infarction-cardiac-rehabilitation-and-prevention-of-further-cardiovascular-disease-pdf-35109748874437>.
3. BACPR. Cardiovascular Disease Prevention and Rehabilitation 2012 31/05/2017. Available from: [http://www.bacpr.com/resources/46C\\_BACPR\\_Standards\\_and\\_Core\\_Components\\_2012.pdf](http://www.bacpr.com/resources/46C_BACPR_Standards_and_Core_Components_2012.pdf).
4. Piepoli MF, Corrà U, Adamopoulos S, Benzer W, Bjarnason-Wehrens B, Cupples M, et al. Secondary prevention in the clinical management of patients with cardiovascular diseases. Core components, standards and outcome measures for referral and delivery: a policy statement from the cardiac rehabilitation section of the European Association for Cardiovascular Prevention & Rehabilitation. Endorsed by the Committee for Practice Guidelines of the European Society of Cardiology. *Eur J Prev Cardiol.* 2014;21(6):664-81.
5. Balady GJ, Williams MA, Ades PA, Bittner V, Comoss P, Foody JA, et al. Core components of cardiac rehabilitation/secondary prevention programs: 2007 update: a scientific statement from the American Heart Association Exercise, Cardiac Rehabilitation, and Prevention Committee, the Council on Clinical Cardiology; the Councils on Cardiovascular Nursing, Epidemiology and Prevention, and Nutrition, Physical Activity, and Metabolism; and the American Association of Cardiovascular and Pulmonary Rehabilitation. *J Cardiopulm Rehabil Prev.* 2007;27(3):121-9.
6. ACPICR. Standards for Physical Activity and Exercise in the Cardiovascular Population 2015 31/05/2017. Available from: [http://acpicr.com/sites/default/files/ACPICR\\_Standards\\_2015.pdf](http://acpicr.com/sites/default/files/ACPICR_Standards_2015.pdf).
7. Dalal HM, Doherty P, Taylor RS. Cardiac rehabilitation. *BMJ.* 2015;351:h5000.
8. Buckley JP, Furze G, Doherty P, Speck L, Connolly S, Hinton S, et al. BACPR scientific statement: British standards and core components for cardiovascular disease prevention and rehabilitation. *Heart.* 2013;99(15):1069-71.
9. Dalal HM, Zawada A, Jolly K, Moxham T, Taylor RS. Home based versus centre based cardiac rehabilitation: Cochrane systematic review and meta-analysis. *BMJ.* 2010;340:b5631.

10. Anderson L, Oldridge N, Thompson DR, Zwisler AD, Rees K, Martin N, et al. Exercise-Based Cardiac Rehabilitation for Coronary Heart Disease: Cochrane Systematic Review and Meta-Analysis. *J Am Coll Cardiol*. 2016;67(1):1-12.
11. Keeley EC, Boura JA, Grines CL. Primary angioplasty versus intravenous thrombolytic therapy for acute myocardial infarction: a quantitative review of 23 randomised trials. *Lancet*. 2003;361(9351):13-20.
12. D'Souza SP, Mamas MA, Fraser DG, Fath-Ordoubadi F. Routine early coronary angioplasty versus ischaemia-guided angioplasty after thrombolysis in acute ST-elevation myocardial infarction: a meta-analysis. *Eur Heart J*. 2011;32(8):972-82.
13. Van de Werf F, Ardissino D, Betriu A, Cokkinos DV, Falk E, Fox KA, et al. Management of acute myocardial infarction in patients presenting with ST-segment elevation. The Task Force on the Management of Acute Myocardial Infarction of the European Society of Cardiology. *Eur Heart J*. 2003;24(1):28-66.
14. West RM, Cattle BA, Bouyssié M, Squire I, de Belder M, Fox KA, et al. Impact of hospital proportion and volume on primary percutaneous coronary intervention performance in England and Wales. *Eur Heart J*. 2011;32(6):706-11.
15. Anon. Reduction in mortality after myocardial infarction with long-term beta-adrenoceptor blockade. Multicentre international study: supplementary report. *Br Med J*. 1977;2(6084):419-21.
16. Elwood PC, Cochrane AL, Burr ML, Sweetnam PM, Williams G, Welsby E, et al. A randomized controlled trial of acetyl salicylic acid in the secondary prevention of mortality from myocardial infarction. *Br Med J*. 1974;1(5905):436-40.
17. Anon. Randomised trial of cholesterol lowering in 4444 patients with coronary heart disease: the Scandinavian Simvastatin Survival Study (4S). *Lancet*. 1994;344(8934):1383-9.
18. Anon. Indications for ACE inhibitors in the early treatment of acute myocardial infarction: systematic overview of individual data from 100,000 patients in randomized trials. ACE Inhibitor Myocardial Infarction Collaborative Group. *Circulation*. 1998;97(22):2202-12.
19. Skinner JS, Minhas R. Commentary on NICE guidance for secondary prevention for patients following a myocardial infarction. *Heart*. 2007;93(7):864-6.
20. Eisen A, Bhatt DL. Optimal duration of dual antiplatelet therapy after acute coronary syndromes and coronary stenting. *Heart*. 2016.
21. Gaziano TA, Bitton A, Anand S, Abrahams-Gessel S, Murphy A. Growing epidemic of coronary heart disease in low- and middle-income countries. *Curr Probl Cardiol*. 2010;35(2):72-115.
22. Moher D, Liberati A, Tetzlaff J, Altman DG, Group P. Preferred reporting items for systematic reviews and meta-analyses: the PRISMA Statement. *Open Med*. 2009;3(3):e123-30.
23. The Task Force on the Management of Acute Myocardial Infarction of the European Society of Cardiology. Acute myocardial infarction: pre-hospital and in-hospital management. The Task Force on the Management of Acute Myocardial Infarction of the European Society of Cardiology. *Eur Heart J*. 1996;17(1):43-63.
24. Wood DA DP, Poutler N, et al. Joint British recommendations on prevention of coronary heart disease in clinical practice. British Cardiac Society, British Hyperlipidaemia Association, British Hypertension Society, endorsed by the British Diabetic Association. *Heart*. 1998;80 Suppl 2:S1-29.
25. RevMan. The Nordic Cochrane Centre: The Cochrane Collaboration, version 5.3 (Review Manager)2014.
26. Higgins JP, Thompson SG, Deeks JJ, Altman DG. Measuring inconsistency in meta-analyses. *BMJ*. 2003;327(7414):557-60.
27. Higgins JP, Altman DG, Gøtzsche PC, Jüni P, Moher D, Oxman AD, et al. The Cochrane Collaboration's tool for assessing risk of bias in randomised trials. *BMJ*. 2011;343:d5928.
28. Kadda O, Kotanidou A, Manginas A, Stavridis G, Nanas S, Panagiotakos DB. Lifestyle intervention and one-year prognosis of patients following open heart surgery: a randomised clinical trial. *Journal of Clinical Nursing*. 2015;24(11-12):1611-21.
29. Santaularia N, Caminal J, Arnau A, Perramon M, Montesinos J, Abenoza Guardiola M, et al. The efficacy of a supervised exercise training programme on readmission rates in patients with myocardial ischemia: Results from a randomised controlled trial. *European Journal of Cardiovascular Nursing*. 2017;16(3):201-12.
30. Hambrecht R, Walther C, Möbius-Winkler S, Gielen S, Linke A, Conradi K, et al. Percutaneous coronary angioplasty compared with exercise training in patients with stable coronary artery disease: a randomized trial. *Circulation*. 2004;109(11):1371-8.
31. West RR, Jones DA, Henderson AH. Rehabilitation after myocardial infarction trial (RAMIT): multi-centre randomised controlled trial of comprehensive cardiac rehabilitation in patients following acute myocardial infarction. *Heart*. 2012;98(8):637-44.
32. Belardinelli R, Paolini I, Cianci G, Piva R, Georgiou D, Purcaro A. Exercise training intervention after coronary angioplasty: the ETICA trial. *J Am Coll Cardiol*. 2001;37(7):1891-900.
33. Giallauria F, Cirillo P, Lucci R, Pacileo M, De Lorenzo A, D'Agostino M, et al. Left ventricular remodelling in patients with moderate systolic dysfunction after myocardial infarction: favourable effects of exercise training and predictive role of N-terminal pro-brain natriuretic peptide. *Eur J Cardiovasc Prev Rehabil*. 2008;15(1):113-8.



34. Maroto JM, Artigao Ramírez R, Morales Durán MD, de Pablo Zarzosa C, Abraira V. [Cardiac rehabilitation in patients with myocardial infarction: a 10-year follow-up study]. *Rev Esp Cardiol*. 2005;58(10):1181-7.
35. Munk PS, Staal EM, Butt N, Isaksen K, Larsen AI. High-intensity interval training may reduce in-stent restenosis following percutaneous coronary intervention with stent implantation A randomized controlled trial evaluating the relationship to endothelial function and inflammation. *Am Heart J*. 2009;158(5):734-41.
36. Oerkild B, Frederiksen M, Hansen JF, Prescott E. Home-based cardiac rehabilitation is an attractive alternative to no cardiac rehabilitation for elderly patients with coronary heart disease: results from a randomised clinical trial. *BMJ Open*. 2012;2(6).
37. Vestfold Heartcare Study Group. Influence on lifestyle measures and five-year coronary risk by a comprehensive lifestyle intervention programme in patients with coronary heart disease. *Eur J Cardiovasc Prev Rehabil*. 2003;10(6):429-37.
38. Zwisler AD, Soja AM, Rasmussen S, Frederiksen M, Abedini S, Abadini S, et al. Hospital-based comprehensive cardiac rehabilitation versus usual care among patients with congestive heart failure, ischemic heart disease, or high risk of ischemic heart disease: 12-month results of a randomized clinical trial. *Am Heart J*. 2008;155(6):1106-13.
39. Aronov DM, Krasnitskii VB, Bubnova MG, Pozdnyakov IM, Ioseliani DG, Shchegol'kov AN, et al. [Physical training at ambulatory-polyclinical stage in complex rehabilitation and secondary prevention of patients with ischemic heart disease after acute incidents. Effect on physical working capacity, hemodynamics, blood lipids, clinical course and prognosis (Russian cooperative study)]. *Kardiologiya*. 2009;49(3):49-56.
40. Briffa TG, Eckermann SD, Griffiths AD, Harris PJ, Heath MR, Freedman SB, et al. Cost-effectiveness of rehabilitation after an acute coronary event: a randomised controlled trial. *Med J Aust*. 2005;183(9):450-5.
41. Higgins HC, Hayes RL, McKenna KT. Rehabilitation outcomes following percutaneous coronary interventions (PCI). *Patient Educ Couns*. 2001;43(3):219-30.
42. Houle J, Doyon O, Vadeboncoeur N, Turbide G, Diaz A, Poirier P. Effectiveness of a pedometer-based program using a socio-cognitive intervention on physical activity and quality of life in a setting of cardiac rehabilitation. *Can J Cardiol*. 2012;28(1):27-32.
43. Kovoov P, Lee AK, Carrozzi F, Wiseman V, Byth K, Zecchin R, et al. Return to full normal activities including work at two weeks after acute myocardial infarction. *Am J Cardiol*. 2006;97(7):952-8.
44. Maddison R, Pfaeffli L, Whittaker R, Stewart R, Kerr A, Jiang Y, et al. A mobile phone intervention increases physical activity in people with cardiovascular disease: Results from the HEART randomized controlled trial. *Eur J Prev Cardiol*. 2014;22(6):701-9.
45. Mutwalli HA, Fallows SJ, Arnous AA, Zamzami MS. Randomized controlled evaluation shows the effectiveness of a home-based cardiac rehabilitation program. *Saudi Med J*. 2012;33(2):152-9.
46. Reid RD, Morrin LI, Beaton LJ, Papadakis S, Kocourek J, McDonnell L, et al. Randomized trial of an internet-based computer-tailored expert system for physical activity in patients with heart disease. *Eur J Prev Cardiol*. 2012;19(6):1357-64.
47. Seki E, Watanabe Y, Shimada K, Sunayama S, Onishi T, Kawakami K, et al. Effects of a phase III cardiac rehabilitation program on physical status and lipid profiles in elderly patients with coronary artery disease: Juntendo Cardiac Rehabilitation Program (J-CARP). *Circ J*. 2008;72(8):1230-4.
48. Toobert DJ, Glasgow RE, Radcliffe JL. Physiologic and related behavioral outcomes from the Women's Lifestyle Heart Trial. *Ann Behav Med*. 2000;22(1):1-9.
49. Wang W, Chair SY, Thompson DR, Twinn SF. Effects of home-based rehabilitation on health-related quality of life and psychological status in Chinese patients recovering from acute myocardial infarction. *Heart Lung*. 2012;41(1):15-25.
50. Yu CM, Lau CP, Chau J, McGhee S, Kong SL, Cheung BM, et al. A short course of cardiac rehabilitation program is highly cost effective in improving long-term quality of life in patients with recent myocardial infarction or percutaneous coronary intervention. *Arch Phys Med Rehabil*. 2004;85(12):1915-22.
51. Toobert DJ, Strycker LA, Glasgow RE. Lifestyle change in women with coronary heart disease: what do we know? *J Womens Health*. 1998;7(6):685-99.
52. Jolliffe JA, Rees K, Taylor RS, Thompson D, Oldridge N, Ebrahim S. Exercise-based rehabilitation for coronary heart disease. *Cochrane Database Syst Rev*. 2001(1):CD001800.
53. Heran BS, Chen JM, Ebrahim S, Moxham T, Oldridge N, Rees K, et al. Exercise-based cardiac rehabilitation for coronary heart disease. *Cochrane Database Syst Rev*. 2011(7):CD001800.
54. Wilhelmsen L, Sanne H, Elmfeldt D, Grimby G, Tibblin G, Wedel H. A controlled trial of physical training after myocardial infarction. Effects on risk factors, nonfatal reinfarction, and death. *Prev Med*. 1975;4(4):491-508.
55. van Halewijn G, Deckers J, Tay HY, van Domburg R, Kotseva K, Wood D. Lessons from contemporary trials of cardiovascular prevention and rehabilitation: A systematic review and meta-analysis. *Int J Cardiol*. 2017;232:294-303.
56. Valkeinen H, Aaltonen S, Kujala UM. Effects of exercise training on oxygen uptake in coronary heart disease: a systematic review and meta-analysis. *Scand J Med Sci Sports*. 2010;20(4):545-55.

- 1 57. Yohannes AM, Doherty P, Bundy C, Yalfani A. The long-term benefits of cardiac rehabilitation on  
2 depression, anxiety, physical activity and quality of life. *J Clin Nurs*. 2010;19(19-20):2806-13.
- 3 58. Conraads VM, Denollet J, De Maeyer C, Van Craenenbroeck E, Verheyen J, Beckers P. Exercise training  
4 as an essential component of cardiac rehabilitation. *Heart*. 2012;98(8):674-5; author reply 5.
- 5 59. Sattelmair J, Pertman J, Ding EL, Kohl HW, Haskell W, Lee IM. Dose response between physical activity  
6 and risk of coronary heart disease: a meta-analysis. *Circulation*. 2011;124(7):789-95.
- 7 60. Kodama S, Saito K, Tanaka S, Maki M, Yachi Y, Asumi M, et al. Cardiorespiratory fitness as a  
8 quantitative predictor of all-cause mortality and cardiovascular events in healthy men and women: a meta-analysis.  
9 *JAMA*. 2009;301(19):2024-35.
- 10 61. Garber CE, Blissmer B, Deschenes MR, Franklin BA, Lamonte MJ, Lee IM, et al. American College of  
11 Sports Medicine position stand. Quantity and quality of exercise for developing and maintaining cardiorespiratory,  
12 musculoskeletal, and neuromotor fitness in apparently healthy adults: guidance for prescribing exercise. *Med Sci  
13 Sports Exerc*. 2011;43(7):1334-59.
- 14 62. McGregor G, Nichols S, Hamborg T, Bryning L, Tudor-Edwards R, Markland D, et al. High-intensity  
15 interval training versus moderate-intensity steady-state training in UK cardiac rehabilitation programmes (HIIT or  
16 MISS UK): study protocol for a multicentre randomised controlled trial and economic evaluation. *BMJ Open*.  
17 2016;6(11):e012843.

## 18 **Legends**

19 *Figure 1.* Summary of study selection process

20 *Figure 2.* All-cause mortality for studies at their longest follow-up period. Filled squares represent the risk difference for individual  
21 studies at the longest reported follow-up. The boxes are proportional to the weight of each study and the lines represent their 95%  
22 confidence interval (CI). The filled diamond represents the pooled risk difference. Weights are from random effects analysis. CR-  
23 Cardiac Rehabilitation.

24 *Figure 3.* Cardiovascular mortality for studies at their longest follow-up period. Filled squares represent the risk difference for  
25 individual studies at the longest reported follow-up. The boxes are proportional to the weight of each study and the lines represent  
26 their 95% confidence interval (CI). The filled diamond represents the pooled risk difference. Weights are from random effects  
27 analysis. CR- Cardiac Rehabilitation.

28 *Figure 4.* Hospital admissions for studies at their longest follow-up period. Filled squares represent the risk difference for  
29 individual studies at the longest reported follow-up. The boxes are proportional to the weight of each study and the lines represent  
30 their 95% confidence interval (CI). The filled diamond represents the pooled risk difference. Weights are from random effects  
31 analysis. CR- Cardiac Rehabilitation.

32  
33  
34  
35  
36  
37  
38  
39  
40  
41  
42  
43  
44  
45  
46  
47  
48  
49  
50  
51  
52  
53  
54  
55  
56  
57  
58  
59  
60



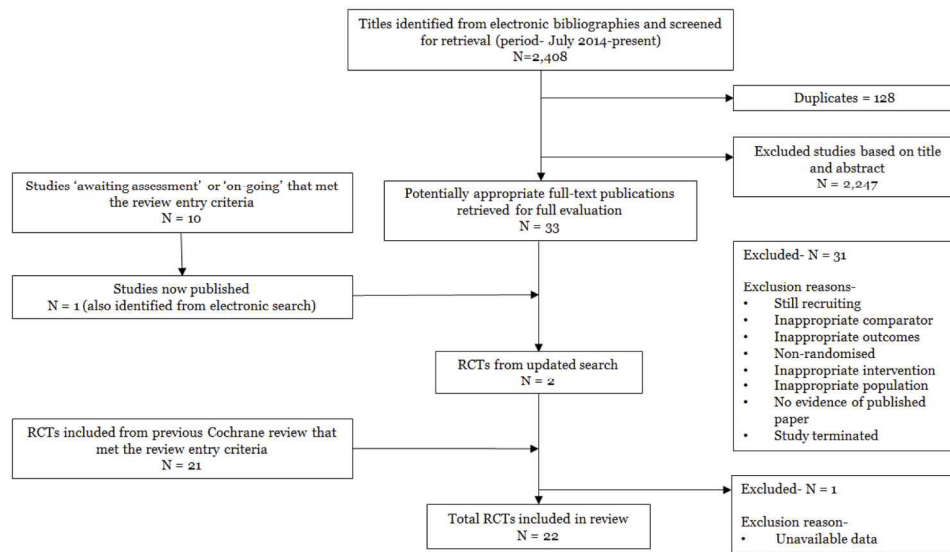



Figure 2. All-cause mortality for studies at their longest follow-up period. Filled squares represent the risk difference for individual studies at the longest reported follow-up. The boxes are proportional to the weight of each study and the lines represent their 95% confidence interval (CI). The filled diamond represents the pooled risk difference. Weights are from random effects analysis. CR- Cardiac Rehabilitation.

209x278mm (300 x 300 DPI)

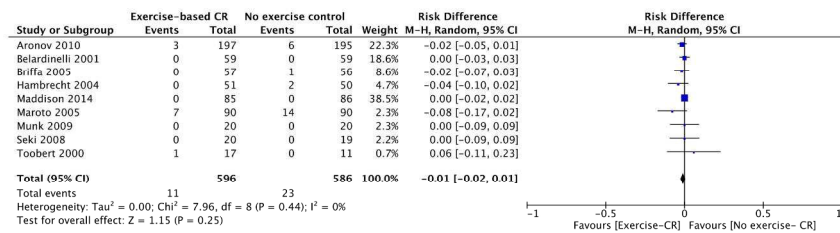

Figure 3. Cardiovascular mortality for studies at their longest follow-up period. Filled squares represent the risk difference for individual studies at the longest reported follow-up. The boxes are proportional to the weight of each study and the lines represent their 95% confidence interval (CI). The filled diamond represents the pooled risk difference. Weights are from random effects analysis. CR- Cardiac Rehabilitation.

209x278mm (300 x 300 DPI)

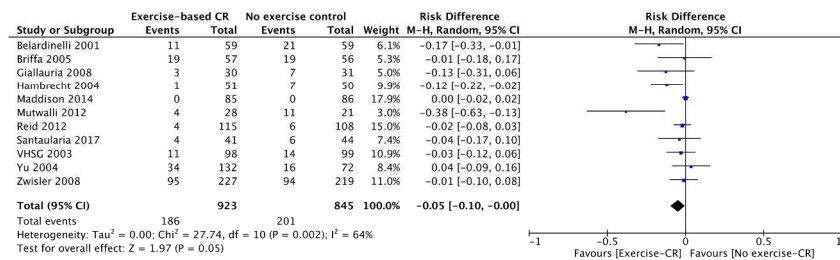

Figure 4. Hospital admissions for studies at their longest follow-up period. Filled squares represent the risk difference for individual studies at the longest reported follow-up. The boxes are proportional to the weight of each study and the lines represent their 95% confidence interval (CI). The filled diamond represents the pooled risk difference. Weights are from random effects analysis. CR- Cardiac Rehabilitation.

209x278mm (300 x 300 DPI)

**Appendix 1**

Search Name: CENTRAL repeat search- limited 2014-2017

Last Saved: 28/02/2017 14:50:03.214

Description: 28/02/17

ID Search

#1 MeSH descriptor: [Myocardial Ischemia] explode all trees

#2 (myocard\* near isch\*mi\*):ti,ab,kw

#3 isch\*mi\* near heart:ti,ab,kw

#4 MeSH descriptor: [Coronary Artery Bypass] explode all trees

#5 myocard\* near infarct\*:ti,ab,kw

#6 heart near infarct\*:ti,ab,kw

#7 angina:ti,ab,kw

#8 coronary near (disease\* or bypass or thrombo\* or angioplast\*):ti,ab,kw

#9 MeSH descriptor: [Percutaneous Coronary Intervention] explode all trees

#10 (percutaneous next coronary near/2 (interven\* or revascular\*))

#11 MeSH descriptor: [Angioplasty] explode all trees

#12 angioplast\*

#13 ((coronary or arterial) near/4 dilat\*)

#14 endoluminal next repair\*

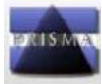

# PRISMA 2009 Checklist

| Section/topic                      | #  | Checklist item                                                                                                                                                                                                                                                                                              | Reported on page # |
|------------------------------------|----|-------------------------------------------------------------------------------------------------------------------------------------------------------------------------------------------------------------------------------------------------------------------------------------------------------------|--------------------|
| <b>TITLE</b>                       |    |                                                                                                                                                                                                                                                                                                             |                    |
| Title                              | 1  | Identify the report as a systematic review, meta-analysis, or both.                                                                                                                                                                                                                                         | 1                  |
| <b>ABSTRACT</b>                    |    |                                                                                                                                                                                                                                                                                                             |                    |
| Structured summary                 | 2  | Provide a structured summary including, as applicable: background; objectives; data sources; study eligibility criteria, participants, and interventions; study appraisal and synthesis methods; results; limitations; conclusions and implications of key findings; systematic review registration number. | 2                  |
| <b>INTRODUCTION</b>                |    |                                                                                                                                                                                                                                                                                                             |                    |
| Rationale                          | 3  | Describe the rationale for the review in the context of what is already known.                                                                                                                                                                                                                              | 3                  |
| Objectives                         | 4  | Provide an explicit statement of questions being addressed with reference to participants, interventions, comparisons, outcomes, and study design (PICOS).                                                                                                                                                  | 4                  |
| <b>METHODS</b>                     |    |                                                                                                                                                                                                                                                                                                             |                    |
| Protocol and registration          | 5  | Indicate if a review protocol exists, if and where it can be accessed (e.g., Web address), and, if available, provide registration information including registration number.                                                                                                                               | 2                  |
| Eligibility criteria               | 6  | Specify study characteristics (e.g., PICOS, length of follow-up) and report characteristics (e.g., years considered, language, publication status) used as criteria for eligibility, giving rationale.                                                                                                      | 4,5                |
| Information sources                | 7  | Describe all information sources (e.g., databases with dates of coverage, contact with study authors to identify additional studies) in the search and date last searched.                                                                                                                                  | 4                  |
| Search                             | 8  | Present full electronic search strategy for at least one database, including any limits used, such that it could be repeated.                                                                                                                                                                               | 4/appendix 1       |
| Study selection                    | 9  | State the process for selecting studies (i.e., screening, eligibility, included in systematic review, and, if applicable, included in the meta-analysis).                                                                                                                                                   | 4,5                |
| Data collection process            | 10 | Describe method of data extraction from reports (e.g., piloted forms, independently, in duplicate) and any processes for obtaining and confirming data from investigators.                                                                                                                                  | 6                  |
| Data items                         | 11 | List and define all variables for which data were sought (e.g., PICOS, funding sources) and any assumptions and simplifications made.                                                                                                                                                                       | 4,5                |
| Risk of bias in individual studies | 12 | Describe methods used for assessing risk of bias of individual studies (including specification of whether this was done at the study or outcome level), and how this information is to be used in any data synthesis.                                                                                      | 6                  |
| Summary measures                   | 13 | State the principal summary measures (e.g., risk ratio, difference in means).                                                                                                                                                                                                                               | 6                  |
| Synthesis of results               | 14 | Describe the methods of handling data and combining results of studies, if done, including measures of consistency (e.g., $I^2$ ) for each meta-analysis.                                                                                                                                                   | 6                  |

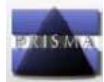

# PRISMA 2009 Checklist

| Section/topic                 | #  | Checklist item                                                                                                                                                                                           | Reported on page # |
|-------------------------------|----|----------------------------------------------------------------------------------------------------------------------------------------------------------------------------------------------------------|--------------------|
| Risk of bias across studies   | 15 | Specify any assessment of risk of bias that may affect the cumulative evidence (e.g., publication bias, selective reporting within studies).                                                             | 5,6                |
| Additional analyses           | 16 | Describe methods of additional analyses (e.g., sensitivity or subgroup analyses, meta-regression), if done, indicating which were pre-specified.                                                         | N/A                |
| <b>RESULTS</b>                |    |                                                                                                                                                                                                          |                    |
| Study selection               | 17 | Give numbers of studies screened, assessed for eligibility, and included in the review, with reasons for exclusions at each stage, ideally with a flow diagram.                                          | 7                  |
| Study characteristics         | 18 | For each study, present characteristics for which data were extracted (e.g., study size, PICOS, follow-up period) and provide the citations.                                                             | 12-17              |
| Risk of bias within studies   | 19 | Present data on risk of bias of each study and, if available, any outcome level assessment (see item 12).                                                                                                | 6, 12,13           |
| Results of individual studies | 20 | For all outcomes considered (benefits or harms), present, for each study: (a) simple summary data for each intervention group (b) effect estimates and confidence intervals, ideally with a forest plot. | 8,9                |
| Synthesis of results          | 21 | Present results of each meta-analysis done, including confidence intervals and measures of consistency.                                                                                                  | 8,9/figures 2,3,4  |
| Risk of bias across studies   | 22 | Present results of any assessment of risk of bias across studies (see Item 15).                                                                                                                          | 8,9                |
| Additional analysis           | 23 | Give results of additional analyses, if done (e.g., sensitivity or subgroup analyses, meta-regression [see Item 16]).                                                                                    | N/A                |
| <b>DISCUSSION</b>             |    |                                                                                                                                                                                                          |                    |
| Summary of evidence           | 24 | Summarize the main findings including the strength of evidence for each main outcome; consider their relevance to key groups (e.g., healthcare providers, users, and policy makers).                     | 9,10               |
| Limitations                   | 25 | Discuss limitations at study and outcome level (e.g., risk of bias), and at review-level (e.g., incomplete retrieval of identified research, reporting bias).                                            | 10,11              |
| Conclusions                   | 26 | Provide a general interpretation of the results in the context of other evidence, and implications for future research.                                                                                  | 11                 |
| <b>FUNDING</b>                |    |                                                                                                                                                                                                          |                    |
| Funding                       | 27 | Describe sources of funding for the systematic review and other support (e.g., supply of data); role of funders for the systematic review.                                                               | 12                 |

From: Moher D, Liberati A, Tetzlaff J, Altman DG, The PRISMA Group (2009). Preferred Reporting Items for Systematic Reviews and Meta-Analyses: The PRISMA Statement. PLoS Med 6(6): e1000097. doi:10.1371/journal.pmed1000097

For more information, visit: [www.prisma-statement.org](http://www.prisma-statement.org).

# BMJ Open

## Is exercise-based cardiac rehabilitation effective: a systematic review and meta-analysis to re-examine the evidence.

|                                 |                                                                                                                                                                                                                                                                                                                                                                                                                                                                                                                                                                                                                                                                                                                                                                                                                                                                          |
|---------------------------------|--------------------------------------------------------------------------------------------------------------------------------------------------------------------------------------------------------------------------------------------------------------------------------------------------------------------------------------------------------------------------------------------------------------------------------------------------------------------------------------------------------------------------------------------------------------------------------------------------------------------------------------------------------------------------------------------------------------------------------------------------------------------------------------------------------------------------------------------------------------------------|
| Journal:                        | <i>BMJ Open</i>                                                                                                                                                                                                                                                                                                                                                                                                                                                                                                                                                                                                                                                                                                                                                                                                                                                          |
| Manuscript ID                   | bmjopen-2017-019656.R2                                                                                                                                                                                                                                                                                                                                                                                                                                                                                                                                                                                                                                                                                                                                                                                                                                                   |
| Article Type:                   | Research                                                                                                                                                                                                                                                                                                                                                                                                                                                                                                                                                                                                                                                                                                                                                                                                                                                                 |
| Date Submitted by the Author:   | 26-Jan-2018                                                                                                                                                                                                                                                                                                                                                                                                                                                                                                                                                                                                                                                                                                                                                                                                                                                              |
| Complete List of Authors:       | Powell, Richard; University Hospitals Coventry and Warwickshire NHS Trust, Department of Cardiac Rehabilitation, Centre for Exercise & Health, ; University of Warwick, Warwick Clinical Trials Unit, Warwick Medical School,<br>McGregor, Gordon; University Hospitals Coventry and Warwickshire NHS Trust, Department of Cardiac Rehabilitation, Centre for Exercise & Health, ; Coventry University, Faculty of Health and Life Sciences,<br>Ennis, Stuart; University Hospitals Coventry and Warwickshire NHS Trust, Department of Cardiac Rehabilitation, Centre for Exercise & Health, ; Cardiff Metropolitan University, Cardiff Centre for Exercise & Health,<br>Kimani, Peter; University of Warwick, Statistics and Epidemiology Unit, Warwick Medical School,<br>Underwood, Martin; Warwick University, Warwick Clinical Trials Unit, Warwick Medical School, |
| <b>Primary Subject Heading</b>: | Rehabilitation medicine                                                                                                                                                                                                                                                                                                                                                                                                                                                                                                                                                                                                                                                                                                                                                                                                                                                  |
| Secondary Subject Heading:      | Cardiovascular medicine, Evidence based practice                                                                                                                                                                                                                                                                                                                                                                                                                                                                                                                                                                                                                                                                                                                                                                                                                         |
| Keywords:                       | Coronary heart disease < CARDIOLOGY, Ischaemic heart disease < CARDIOLOGY, Myocardial infarction < CARDIOLOGY, REHABILITATION MEDICINE                                                                                                                                                                                                                                                                                                                                                                                                                                                                                                                                                                                                                                                                                                                                   |
|                                 |                                                                                                                                                                                                                                                                                                                                                                                                                                                                                                                                                                                                                                                                                                                                                                                                                                                                          |

SCHOLARONE™  
Manuscripts



# Is exercise-based cardiac rehabilitation effective: a systematic review and meta-analysis to re- examine the evidence.

R Powell <sup>1,5\*</sup>, G McGregor <sup>1,2</sup>, S Ennis <sup>1,3</sup>, P K Kimani <sup>4</sup>, M Underwood <sup>5</sup>

<sup>1</sup> Department of Cardiac Rehabilitation, Centre for Exercise & Health, University Hospital, Coventry, CV1 3LN, UK, <sup>2</sup> Faculty of Health and Life Sciences, Coventry University, Coventry, CV1 5FB, UK, <sup>3</sup> Cardiff Centre for Exercise & Health, Cardiff Metropolitan University, Cardiff, CF5 2YB, UK <sup>4</sup> Statistics and Epidemiology Unit, Warwick Medical School, University of Warwick, Coventry, CV4 7AL, UK, <sup>5</sup> Warwick Clinical Trials Unit, Warwick Medical School, University of Warwick, Coventry, CV4 7AL, UK.

R Powell, Clinical Exercise Physiologist

G McGregor, Clinical Research Fellow

S Ennis, Clinical Exercise Physiologist

P K Kimani, Assistant Professor in Medical Statistics

M Underwood, Professor

\*Correspondence to: Richard Powell, [Richard.powell@uhcw.nhs.uk](mailto:Richard.powell@uhcw.nhs.uk)

## Word count

3778 words

## Abstract

### *Objectives*

To determine the contemporary effectiveness of exercise-based Cardiac Rehabilitation (CR) in terms of all-cause mortality, cardiovascular mortality and hospital admissions.

### *Data sources*

Studies included in, or meeting the entry criteria for the 2016 Cochrane review of exercise-based CR in patients with coronary artery disease.

### *Study eligibility criteria*

Randomised controlled trials (RCTs) of exercise-based CR vs. a no exercise control whose participants were recruited after the year 2000.

### *Study appraisal and synthesis methods*

Two separate reviewers independently screened the characteristics of studies. One reviewer quality appraised any new studies and assessed their risk of bias using the Cochrane Collaboration's recommended risk of bias tool. Data were reported as the risk difference (95% CI).

### *Results*

We included 22 studies with 4,834 participants (mean age 59.5 years, 78.4% male). We found no differences in outcomes between exercise-based CR and a no exercise control at their longest follow-up period for: all-cause mortality (19 studies; n=4,194; risk difference 0.00, 95% CI -0.02 to 0.01, p=0.38) or cardiovascular mortality (9 studies; n = 1,182; risk difference -0.01, 95% CI -0.02 to 0.01, p=0.25). We found a small reduction in hospital admissions of borderline statistical significance (11 studies; n= 1,768; risk difference -0.05, 95% CI -0.10 to -0.00, p=0.05).

### *Conclusions and implications of key findings*

Our analysis indicates conclusively that the current approach to exercise-based CR has no effect on all-cause mortality or cardiovascular mortality, when compared to a no exercise control. There may be a small reduction in hospital admissions following exercise-based CR that is unlikely to be clinically important.

### *Systematic review registration number*

Prospero: International prospective register of systematic reviews. 2017. 42017073616.  
Available from: [https://www.crd.york.ac.uk/PROSPERO/display\\_record.asp?ID=CRD42017073616](https://www.crd.york.ac.uk/PROSPERO/display_record.asp?ID=CRD42017073616)

### ***Strengths and Limitations of this study***

- To our knowledge, this is the first systematic review of exercise-based CR that has pooled data relevant to the current medical management of patients diagnosed with coronary artery disease.
- For analysis, we present the data as the risk difference (95% CI), which ensures all studies reporting data on the outcomes of interest were included.
- This systematic review pools data from studies that deliver an intervention recognised as best practice in exercise-based CR, where multiple approaches, including educational/psychosocial components, as well as the exercise component were used.
- We have not done a de novo quality assessment of 21/22 studies included in this review and instead rely on a previous Cochrane assessment.
- We did not include health-related quality of life as an outcome measure as this is unsuitable for meta-analysis.

### **Keywords**

Coronary artery disease, exercise-based cardiac rehabilitation, all-cause mortality, cardiovascular mortality, hospital admissions.

### **Background**

Cardiovascular disease is the world's biggest killer, accounting for 15 million deaths in 2015(1).

Secondary prevention of coronary artery disease through exercise-based CR in those who have a diagnosis of coronary artery disease, has the potential to reduce mortality, reduce hospital admissions and increase quality of life. Guidelines internationally endorse the use of exercise-based CR programmes(2-5).

Typically, exercise-based CR aims to achieve 20-60 minutes of moderate intensity continuous exercise, 3-5 times a week, with muscular strength and endurance exercises prescribed in conjunction(6). Additionally, most programmes include supplementary education (coronary risk factors and cardiac misconceptions), advice on diet and access to psychological support(2, 4, 7, 8). Typically exercise-based CR is delivered in a supervised centre-based setting, although home-based programmes are used(9).

A 2016 Cochrane review (63 studies, n=14,486 participants) found benefits of exercise-based CR for patients with coronary artery disease. Both cardiovascular mortality (27 studies, RR 0.74, 95% CI

1 0.64 to 0.86) and hospital re-admissions were reduced (15 studies, RR 0.82, 95% CI 0.70 to 0.96), when  
2 compared to a no exercise control. However, in contrast to previous systematic reviews and meta-  
3 analyses, there was no significant reduction in risk of re-infarction (36 studies, RR 0.90, 95% CI 0.79 to  
4 1.04) or all-cause mortality (47 studies, RR 0.96, 95% CI 0.88 to 1.04)(10).  
5  
6

7 Over recent decades, the medical management of coronary artery disease has been transformed.  
8 The introduction of primary percutaneous coronary intervention has reduced short-term major adverse  
9 cardiac events and increased long-term survival(11-14). Simultaneously, there have also been widespread  
10 advances in secondary preventative medical therapy. This includes the introduction of aspirin and beta-  
11 blockers in the 1980s(15, 16), lipid-lowering statins and angiotensin converting enzyme inhibitors in the  
12 1990s(17, 18) and more recently, the introduction of clopidogrel, a secondary anti-platelet, in 2007(19,  
13 20). Age-adjusted mortality has decreased substantially in this population(21). Systematic reviews and  
14 meta-analyses that include data from older studies may not correctly assess the potential effect of  
15 exercise-based CR. We hypothesise that previous reviews have overestimated the benefit of exercise-  
16 based CR. We hypothesise that previous reviews have overestimated the benefit of exercise-  
17 based CR.  
18  
19  
20  
21

## 22 **Objectives**

23  
24  
25 To determine the contemporary effectiveness of exercise-based CR on all-cause mortality,  
26 cardiovascular mortality, and hospital readmissions in patients with coronary artery disease.  
27  
28

## 29 **Methods**

30  
31  
32 We conducted and reported this meta-analysis in accordance with PRISMA (Preferred Reporting  
33 Items for Systematic Reviews and Meta-Analyses)(22).  
34  
35

## 36 **Search Strategy**

37  
38  
39 To identify relevant studies, we started with the latest Cochrane review of exercise-based CR in  
40 patients with coronary artery disease(10). Studies identified as 'awaiting assessment' or 'on-going' in this  
41 review were re-visited to establish whether publication had been reached. To identify any new studies  
42 published since the completion of the Cochrane review, an updated search was run on the 28/2/2017.  
43 This search used the same search strategies as the latest Cochrane review(10). We searched Cochrane  
44 Central Register of Controlled Trials (CENTRAL) (*appendix 1*), MEDLINE (Ovid), EMBASE (Ovid) and  
45 CINAHL (EBSCO) databases. This approach allowed us to efficiently identify all relevant studies. Where  
46 appropriate, we contacted original authors for clarification of any new included studies.  
47  
48

49 Two separate reviewers (RP and GM) independently screened the characteristics of studies in  
50 the latest Cochrane review, studies identified as 'awaiting assessment' or 'on-going' and studies  
51 identified in the updated search. Full text publications were retrieved to allow for further examination  
52 and to verify study inclusion. Any discrepancies were resolved by a third reviewer (MU).  
53  
54  
55  
56  
57  
58  
59  
60

### ***Criteria for considering studies***

In 1996, The Task Force on the Management of Acute Myocardial Infarction of the European Society of Cardiology first recommended early (within two hours) primary percutaneous interventions in preference to thrombolytic therapy for acute myocardial infarction(23). Two years later, guidelines set by the Joint British recommendations on prevention of Coronary Heart Disease in Clinical Practice were published outlining the recommendations for best practice for secondary prevention medical therapies(24). Although there have been some changes, notably the introduction of a second anti-platelet agent in the early 2000s(19, 20), the approach to secondary prevention medical therapies has not changed since then. Allowing time for implementation of these guidelines and recommendations, we identified and included studies whose participants were recruited after the year 2000, to represent a contemporary population engaging in exercise-based CR.

Where there was no indication of recruitment period, the diagnosis and the secondary preventative medical therapy received by participants included in the trial determined the inclusion or exclusion of the study in the analysis.

### ***Types of studies***

We included randomised controlled trials of exercise-based CR compared to a no exercise control with a minimum follow-up period of six months. Data reported at the longest follow-up period were included in the analysis.

### ***Types of participants***

We used the same entry criterion as previous Cochrane reviews.

- People who have had a myocardial infarction, or who had undergone revascularisation (coronary artery bypass grafting or percutaneous coronary intervention) or who have angina pectoris or coronary artery disease defined by angiography.
- On optimal secondary preventative medical therapy defined by the Joint British recommendations on prevention of Coronary Heart Disease in Clinical Practice(24).
- Recruited to hospital-based, community-based or home-based CR programmes.

### ***Types of intervention(s)***

Randomised controlled trials consisted of supervised or non-supervised exercise-based CR. The intervention was exercise alone or exercise as part of a comprehensive CR programme (consisting of educational/psychosocial components). 'No exercise control' consisted of standard medical care,

1 including optimal secondary preventative medical therapy, education and advice about diet and exercise,  
2 psychosocial support but with no formal exercise intervention.  
3  
4

### 5 ***Types of outcome measures***

6  
7  
8 We extracted data on: all-cause mortality, cardiovascular mortality and hospital re-admissions.  
9 We did not include health-related quality of life as the authors of the 2016 Cochrane review found this  
10 unsuitable for meta-analysis.  
11  
12

### 13 ***Data collection, statistical analysis and quality assessment***

14  
15  
16 We pooled data using Review Manager 5.3(25). Previous Cochrane reviews have presented the  
17 data as individual and pooled risk ratio (95% CI). Using risk ratios automatically removed studies with  
18 no events in either study arm from the analysis. Nine studies (n= 936 participants) reporting on all-  
19 cause mortality, cardiovascular mortality or hospital re-admissions, were excluded from one or more  
20 meta-analyses in the 2016 Cochrane review for this reason. We therefore present the data as the risk  
21 difference (95% CI), which ensures all studies reporting data on the outcomes of interest were included.  
22  
23

24 We applied a random-effects model to all analyses given the clinical heterogeneity of individual  
25 studies. Heterogeneity of included studies were tested statistically using the  $\chi^2$  test of heterogeneity and  
26  $I^2$  statistic(26).  
27

28 We did not repeat quality assurance checks already completed by the authors of the Cochrane  
29 review. For separate study risk of bias breakdown for these studies, we refer the reader to the existing  
30 *characteristics of studies*(10). For studies identified as 'awaiting assessment' or 'on-going' in the latest  
31 Cochrane review, or in the updated search, we quality appraised these studies and assessed their risk of  
32 bias using the Cochrane Collaboration's recommended risk of bias tool(27).  
33  
34  
35

### 36 ***Assessment of risk of bias in additional included study***

37  
38  
39 One reviewer (RP) assessed the risk of bias in any additional included studies (*table 1*).  
40 Assessment of three further quality domains as outlined in the latest Cochrane review was also  
41 conducted (Groups balanced at baseline, Intention-to-treat analysis, Groups received comparable  
42 treatment (except exercise)). A breakdown of the criteria used for assessing these three domains can be  
43 found in the latest Cochrane review. Risk of bias assessments were checked by a second reviewer (GM)  
44 and any discrepancies were resolved by a third reviewer (MU).  
45  
46  
47

### 48 ***Patient Involvement***

49  
50  
51 No patients were involved in setting the objectives or outcome measures of this review, nor were  
52 they involved in the design or implementation. No patients were involved in the analysis or  
53 interpretation of the results, nor the writing of any drafts. There are no plans to disseminate the results  
54 of the review to participants included in the studies of the review or any relevant patient networks.  
55  
56  
57

## Results

### *Studies retrieved*

Of the sixty-three studies included in the Cochrane review, twenty-one studies met our entry criteria. We identified two additional relevant papers not included in the 2016 Cochrane review(28, 29). One was excluded because data for our specific research question were not available in a useable format(28). In total, twenty-two studies (n=4,834 participants) contributed to the analysis (*figure 1*). For the study identified from the updated search(29), there was a low risk of bias in all eight domains, apart from the intention-to-treat analysis, where there was no evidence of this analysis being conducted (*table 1*).

Three studies (3/22; 14%) reported on all three outcomes of interest, eleven studies (11/22; 50%) reported on two outcomes of interest and eight studies (8/22; 36%) reported on one outcome of interest.

Two studies for all-cause mortality(30, 31) and one study for cardiovascular mortality(30) reported data at varying follow-up periods (6 to 12 months; >12 to 36 months; >3 years). Data from these studies were taken at their longest follow-up period. Mean maximum follow-up period was 24.7 months. Maximum follow-up period ranged from 24 weeks to 10 years (*table 2*).

### *Flow diagram*

(*figure 1*).

### *Sample size, gender, age and study origin*

Of our twenty-two studies, ten studies were in Europe(29-38) and twelve from outside of Europe(39-50). We included a total of 4,834 participants (3,788 (78.4%) males). Four studies included males only(30, 34, 45, 47) and one study included women only(51). Participants mean age was 59.5 years. The mean age for individual studies ranged from 47.5 to 76.9 years (*table 2*).

### *Incomplete outcome data*

The majority of trials (18/22; 82%) reported complete follow-up data, regardless of participants who were lost to follow-up or who dropped out. In four studies, outcome data were incomplete for 75 (75/4,834; 1.6%) participants with no description of withdrawal or drop-out(41, 47, 48, 50).

### *Participant diagnosis of coronary artery disease and treatment received*

The diagnosis of participants recruited to the studies was described in the majority of studies (21/22; 95%). Thirteen studies enrolled participants with mixed diagnoses, including angina pectoralis

1 or coronary artery disease defined by angiography, myocardial infarction, percutaneous coronary  
2 interventions or coronary artery bypass grafts(32, 36-42, 44, 46-48, 50). Six studies enrolled  
3 participants following acute myocardial infarction only(29, 31, 33, 34, 43, 49) and two studies enrolled  
4 participants diagnosed with angina pectoralis (unstable and stable angina) only(30, 35). It was unclear  
5 from one study whether participants following myocardial infarction were included and instead, the  
6 population was defined as 'patients after coronary artery bypass graft surgery'(45) (*table 2*).

7  
8  
9 Six studies recruited participants following percutaneous coronary intervention only(30, 32, 33,  
10 35, 41, 46) and one study recruited participants following coronary artery bypass grafting only(45).  
11 Twelve studies included participants who had received thrombolysis, percutaneous coronary  
12 intervention, coronary artery bypass grafting and/or no revascularization procedure(31, 36-40, 42-44,  
13 47, 48, 50). Three studies did not provide any breakdown of coronary intervention or surgical procedure  
14 received by participants prior to enrollment(29, 34, 49) (*table 2*).

### 15 16 17 18 19 **Medication**

20  
21 A full description and breakdown of the medication received by the participants, comparable to  
22 optimal secondary prevention medical therapy defined by the Joint British recommendations on  
23 prevention of Coronary Heart Disease in Clinical Practice set in 1998(24), was provided by 13/22 studies  
24 (59%)(30-33, 35-40, 43, 49, 50). References to co-existing medical therapies were made in 7/22 (32%),  
25 but no breakdowns were provided(29, 34, 41, 42, 45-47). One study referred to the prescription of anti-  
26 hypertensive and hypolipidemic medications without reference to other recommended medications(48).  
27 One study failed to provide any description or breakdown of co-existing medical therapies(44) (*table 2*).

### 28 29 30 31 32 **Clearly defined recruitment period**

33  
34  
35 Seven studies (7/22; 32%) were explicit that they recruited participants after the year 2000(36,  
36 38, 42, 44-46, 49). In three studies, participants were recruited either just before or during the year  
37 2000(30, 31, 41). Due to participant diagnosis, treatment received and co-existing medical therapies, it  
38 was agreed by all reviewers to include these studies.

39  
40 The remaining twelve studies failed to provide a recruitment period. Following further  
41 examination of the full papers, due to adequate description of patient diagnosis, treatment received and  
42 co-existing medical therapies, it was agreed by all reviewers to include these studies (*table 2*).

### 43 44 45 46 **Content of the interventions**

47  
48 The content of the interventions tested was heterogeneous with multiple approaches being  
49 adopted. Sixteen studies (16/22; 73%) compared exercise in combination with other therapies  
50 (education, psychosocial management), whilst six studies compared exercise as a stand-alone  
51 intervention, against a no exercise control. The exercise component alone varied considerably with  
52 respect to setting, training modality, duration, session length, frequency and intensity (*table 3*).

### 53 54 55 56 **Overall effects of interventions**



### All-cause mortality

Nineteen studies (n=4,194 participants) reported all-cause mortality (*figure 2*). There was no difference between groups at their longest follow-up (risk difference = 0.00, 95% CI -0.02 to 0.01, p=0.38). There was no evidence of statistical heterogeneity across trials (P value=0.91, I<sup>2</sup>=0%).

(*figure 2*).

### Cardiovascular mortality

Nine studies (n = 1,182 participants) reported cardiovascular mortality (*figure 3*). There was no difference between groups at their longest follow-up (risk difference = -0.01, 95% CI -0.02 to 0.01, p=0.25). There was no evidence of statistical heterogeneity across trials (P value=0.44, I<sup>2</sup>=0%).

(*figure 3*).

### Hospital admissions

Eleven studies (n= 1,768 participants) reported on proportion with one or more hospital admissions (*figure 4*). There was a reduction of borderline statistical significance (risk difference = -0.05, 95% CI -0.10 to -0.00, p=0.05). There was evidence of statistical heterogeneity across trials (P value=0.002, I<sup>2</sup>=64%).

(*figure 4*).

## Discussion

The effectiveness of exercise-based CR in patients with coronary artery disease has been determined by Cochrane systematic reviews and meta-analyses, providing clinicians and academics with the highest level of evidence over the last 17 years(10, 52, 53). The latest Cochrane review, conducted in 2016, found benefits of exercise-based CR in terms of reduced cardiovascular mortality and hospital admissions, but unlike previous Cochrane reviews, found no effect on all-cause mortality(10). We identified that data from studies included in this review dated back as far as 1975(54). By including such historical data, this Cochrane review may not be correctly assessing the potential effect of contemporary exercise-based CR.

The current review aimed to assess the effect of exercise-based CR in the era of improved reperfusion strategies and simultaneous advances in pharmacological management, by only including studies whose participants were recruited after the year 2000. The majority of interventions tested in the twenty-two included trials (*table 3*) delivered an intervention recognised as best practice in exercise-based CR, where multiple approaches, including educational/psychosocial components, as well as the

1 exercise component were used(2, 3, 8). The interventions were tested against a no exercise control  
2 consisting of educational and psychosocial components alone (*table 3*).

3  
4 The current analyses demonstrated no improvement in all-cause mortality from participation in  
5 exercise-based CR: the risk difference was 0.00 (95% CI -0.02 to 0.01). The largest trial included in our  
6 analysis, the UK-based Rehabilitation after myocardial infarction trial (RAMIT) trial, sought to show a  
7 20% reduction in relative risk based on an 11% mortality; i.e. a 2.2% risk difference(24). The limits of the  
8 95% confidence interval for the effect size in our analysis do not include the RAMIT trial's pre-specified  
9 clinically important difference. We therefore conclude that it is extremely unlikely that there is a  
10 worthwhile benefit from exercise-based CR on all-cause mortality. Furthermore, it is unlikely that future  
11 trials of similar interventions and populations, will change this conclusion. This is supported by a recent  
12 meta-analysis which included participants with other forms of atherosclerotic cardiovascular disease i.e.  
13 peripheral artery disease, ischaemic cerebrovascular accidents, diabetes and hypertension. They too  
14 found a zero effect on all-cause mortality (relative risk 1.00, 95% CI 0.88 to 1.14)(55). With the mean  
15 follow-up period for all studies included in our review being 24.7 months, it may be that any benefits on  
16 mortality will accrue over a longer follow-up. However, the absence of any kind of signal in this review  
17 means a substantial longer-term benefit is unlikely.

18  
19 The current analyses do not quite exclude a worthwhile benefit of exercise-based CR on hospital  
20 admissions. Whilst a risk difference of -0.05 (95% CI -0.10 to -0.00) is of borderline statistical  
21 significance, it is probably clinically unimportant in the context of no change in all-cause mortality.

22  
23 From the studies included in this review, we do not know if there is a worthwhile benefit on  
24 quality of life, as a meta-analysis was not conducted. However, the authors of the 2016 Cochrane review  
25 reported that in four of the twenty-two studies included in this review, there was a significantly higher  
26 quality of life in at least half or more of the sub-scales(32, 45, 46, 49).

27  
28 Based on the present data, we are also unable to comment on whether exercise-based CR might  
29 be cost-effective. Five of the studies in this review included a within trial health economic evaluation(30,  
30 40, 43, 44, 50). Of these five papers, three studies showed no difference in healthcare costs between  
31 groups(40, 43, 50), one found healthcare costs to be lower for exercise-based CR(30), and one failed to  
32 report a p-value for cost difference(44). Whilst a decrease, of borderline statistical significance, in  
33 hospital admissions may improve quality of life for patients, it is unclear if this confers any economic  
34 benefit, in the absence of robust cost-effectiveness analyses.

35  
36 It may be that exercise-based CR has an effect on other outcomes, not specifically addressed in  
37 this review, such as cardiorespiratory fitness, lifestyle risk factor management, adherence to medication,  
38 diet, smoking cessation, psychosocial health and return to work(7, 8, 56, 57). If the focus of future  
39 research is on measuring and improving these outcomes, attention will be needed to develop the best  
40 multi-component intervention.

## 41 ***Strengths and Limitations***

42  
43 To our knowledge, this is the first systematic review of exercise-based CR that has pooled data  
44 relevant to contemporary medical management of patients diagnosed with coronary artery disease.  
45 Although we have not done a de novo quality assessment of 21/22 studies included in this review and  
46

1 instead are relying on a previous Cochrane assessment, it is unlikely that we would have drawn different  
2 conclusions from such an assessment(10).  
3

4 The current review does not provide information on participant baseline characteristics. In the  
5 majority of studies (20/22; 91%), however, baseline characteristics were comparable between the  
6 intervention and control groups(10, 29).  
7

8 Whilst there was no evidence of statistical heterogeneity across trials for all outcome measures  
9 (P value<0.01, I<sup>2</sup>>30%), except for hospital admissions, there was substantial context and interventional  
10 heterogeneity. The studies came from a wide range of clinical environments and countries, and the  
11 interventions delivered ranged greatly in quality. When compared with both the BACPR ‘minimum  
12 standards and core components’(8) and ACPICR guidelines(6), there was considerable variation in the  
13 exercise interventions delivered (*table 3*). Critics have questioned the exercise component reported in  
14 the largest included study, the RAMIT trial (n=1813)(31). They argued that under-dosage of exercise  
15 intensity and duration may have led to the inconclusive result(58). Several other studies included in this  
16 review also fail to report on the intensity, modality and/or duration of the exercise intervention. Exercise  
17 and physical activity has a ‘dose-response’ relationship with cardiovascular disease risk(59). Moreover, a  
18 higher exercise capacity (VO<sub>2</sub> peak) is associated with an improvement in mortality risk(60, 61). If  
19 patients engaging in exercise-based CR do not achieve the correct dose of exercise, a physiological  
20 benefit is unlikely. It is a legitimate concern that participants in many included trials may not have  
21 received an adequate dose of exercise. In the era of contemporary medical management, higher intensity  
22 exercise protocols might be appropriate and effective(62).  
23  
24  
25  
26  
27

28 One major concern is the reporting of adherence to, and fidelity of, exercise interventions(10).  
29 Whilst the majority of studies included in this review report the intended prescription exercise dose(29,  
30 30, 32-37, 39, 40, 47, 50) (*table 3*), it is not possible to determine adherence and fidelity. Without basic  
31 reporting of these parameters, the actual exercise dose received cannot be quantified. This may have a  
32 significant bearing on intervention efficacy and the results of this meta-analysis. Moving forward, the  
33 introduction of checklists and reporting standards of interventional studies should improve reporting  
34 quality and trial interpretation(63).  
35  
36  
37  
38

### 39 **Conclusion**

40  
41 Based on the outcomes of all-cause mortality and cardiovascular mortality, our analysis  
42 indicates conclusively that the current approach to exercise-based CR has no effect when compared to a  
43 no exercise control. There may be a small reduction in hospital admissions following exercise-based CR  
44 that is unlikely to be clinically important.  
45  
46

47 The continued delivery of exercise-based CR needs to be supported by new research to show its  
48 impact on health-related quality of life and whether it is a cost-effective intervention.  
49  
50

### 51 **Contributors**

52  
53 RP and MU were principally responsible for the study concept and design. RP and GM were  
54 responsible for study selection, data extraction and risk of bias assessment. With the assistance of  
55 University Hospital Coventry & Warwickshire library services, RP updated and ran the searches. RP, MU  
56  
57

1 and PK were responsible for statistical analysis and interpretation of data. GM and SE provided clinical  
2 advice. RP and MU wrote the first draft of the review and all co-authors contributed to review and  
3 editing of drafts of the report. All authors approved the final manuscript. RP is the study guarantor and  
4 had full access to all trial level data in the review, takes responsibility for the integrity of the data, and  
5 accuracy of the data analysis, and had final responsibility to submit for publication.  
6  
7

### 8 9 **Copyright**

10  
11 The Corresponding Author has the right to grant on behalf of all authors and does grant on  
12 behalf of all *authors*, a worldwide license to the Publishers and its licensees in perpetuity, in all forms,  
13 formats and media (whether known now or created in the future), to i) publish, reproduce, distribute,  
14 display and store the Contribution, ii) translate the Contribution into other languages, create  
15 adaptations, reprints, include within collections and create summaries, extracts and/or, abstracts of the  
16 Contribution, iii) create any other derivative work(s) based on the Contribution, iv) to exploit all  
17 subsidiary rights in the Contribution, v) the inclusion of electronic links from the Contribution to third  
18 party material where-ever it may be located; and, vi) license any third party to do any or all of the above.  
19  
20  
21  
22

### 23 24 **Funding**

25  
26 This review was not funded and hence no role was played by funders in the conception, data  
27 synthesis, analysis, interpretation or in the drafting of the manuscript.  
28  
29

### 30 31 **Competing interests**

32  
33 All authors have completed the *Unified Competing Interest form* (available on request from the  
34 corresponding author) and declare: no support from any organisation for the submitted work; no  
35 financial relationships with any organisations that might have an interest in the submitted work in the  
36 previous three years, no other relationships or activities that could appear to have influenced the  
37 submitted work.  
38  
39  
40

### 41 42 **Ethical Approval**

43  
44 Ethical approval not required.  
45

### 46 47 **Data sharing**

48  
49 No additional data available.  
50

51  
52 The lead author (RP) affirms that the manuscript is an honest, accurate, and transparent  
53 account of the study being reported; that no important aspects of the study have been omitted; and that  
54 any discrepancies from the study as planned and registered have been explained.  
55  
56  
57

1  
2  
3  
4  
5  
6  
7  
8  
9  
10  
11  
12  
13  
14  
15  
16  
17  
18  
19  
20  
21  
22  
23  
24  
25  
26  
27  
28  
29  
30  
31  
32  
33  
34  
35  
36  
37  
38  
39  
40  
41  
42

## Tables

4  
5  
6  
7  
8  
9  
10  
11  
12  
13  
14  
15  
16  
17  
18  
19  
20  
21  
22  
23  
24  
25  
26  
27  
28  
29  
30  
31  
32  
33  
34  
35  
36  
37  
38  
39  
40  
41  
42

**Table 1. Risk of bias assessment for additional study**

7 Santaularia *et al.* 2017

| Bias                                                         | Authors' judgement | Support for judgement                                                                                                                                                                                                                      |
|--------------------------------------------------------------|--------------------|--------------------------------------------------------------------------------------------------------------------------------------------------------------------------------------------------------------------------------------------|
| Random sequence generation (selection bias)                  | Low risk           | A randomisation list in blocks of ten was created by a computer random number generator. The randomisation list and the allocation of patients to each group were independently controlled by the Clinical Trials Unit.'                   |
| Allocation concealment (selection bias)                      | Low risk           | A randomisation list in blocks of ten was created by a computer random number generator. The randomisation list and the allocation of patients to each group were independently controlled by the Clinical Trials Unit.'                   |
| Blinding of outcome assessment (detection bias) All outcomes | Low risk           | An independent committee that was blind to the patients' treatment group assessed the main outcomes. This committee comprised a cardiologist, a rehabilitation cardiologist and a health information manager, all from different centres.' |
| Incomplete outcome data (attrition bias) All outcomes        | Low risk           | There was no loss to follow-up.                                                                                                                                                                                                            |
| Selective reporting (reporting bias)                         | Low risk           | All outcomes described in the methods were reported in the results. Results regarding quality of life are presented in supplementary data but were not required for the current review.                                                    |
| Groups balanced at baseline                                  | Low risk           | No significant differences between groups were observed, with the exception of gender: 23% of the control group were women compared with 7% in the intervention group ( $p=0.049$ ).                                                       |
| Intention-to-treat analysis conducted                        | High risk          | No analysis was conducted.                                                                                                                                                                                                                 |
| Groups received same treatment (apart from the intervention) | Low risk           | Patients assigned to the control group received standard care given at the hospital'. In addition to standard care, patients randomised to the intervention group....'.                                                                    |

43  
44  
45  
46  
47  
48  
49  
50  
51  
52  
53  
54  
55  
56  
57  
58  
59  
60

**Table 2. Overview of participants, recruitment period, patient diagnosis and medical therapy**

| Reference<br>s, country                | N   | Mean<br>age<br>(year<br>s) | Male<br>participan<br>ts (%) | Recruitme<br>nt period<br>(years) | Maximu<br>m<br>follow-<br>up<br>period | Patient diagnosis                                                             | Medication                                                                                                                                                                       |
|----------------------------------------|-----|----------------------------|------------------------------|-----------------------------------|----------------------------------------|-------------------------------------------------------------------------------|----------------------------------------------------------------------------------------------------------------------------------------------------------------------------------|
| Aronov <i>et al.</i> (2010),<br>Russia | 392 | 61.4                       | 73.5                         | None<br>specified                 | 1 year                                 | AMI, stable angina,<br>unstable angina or<br>myocardial<br>revascularisation. | Standard medical therapy-<br>$\beta$ -blocker, acetylsalicylic<br>acid or other<br>antithrombotic drug,<br>nitrate, ACE inhibitor.<br>Some patients on lipid-<br>lowering drugs. |

|    |                        |     |      |      |              |  |  |  |           |                        |                                          |
|----|------------------------|-----|------|------|--------------|--|--|--|-----------|------------------------|------------------------------------------|
| 1  |                        |     |      |      |              |  |  |  |           |                        |                                          |
| 2  |                        |     |      |      |              |  |  |  |           |                        |                                          |
| 3  |                        |     |      |      |              |  |  |  |           |                        |                                          |
| 4  | Belardinelli           |     |      |      |              |  |  |  | 33        | CAD including AMI.     | According to international               |
| 5  | <i>et al.</i>          |     |      |      |              |  |  |  | months    | Successful PCI in 1 or | accepted protocols-                      |
| 6  | (2001),                | 118 | 61   | 100  | None         |  |  |  |           | 2 native epicardial    | aspirin, ticlopidine,                    |
| 7  | Italy                  |     |      |      | specified    |  |  |  |           | coronary arteries      | calcium antagonists,                     |
| 8  |                        |     |      |      |              |  |  |  |           | only.                  | nitrates.                                |
| 9  |                        |     |      |      |              |  |  |  | 1 year    | Uncomplicated AMI      | Aspirin, antiarrhythmic                  |
| 10 | Briffa <i>et al.</i>   |     |      |      |              |  |  |  |           | or recovery from       | agent, $\beta$ -blocker, ACE             |
| 11 | (2005),                | 113 | 47.5 | 89.5 | None         |  |  |  |           | unstable angina. PCI,  | inhibitor, calcium                       |
| 12 | Australia              |     |      |      | specified.   |  |  |  |           | CABG, thrombolytic     | antagonist, long acting                  |
| 13 |                        |     |      |      |              |  |  |  |           | therapy.               | nitrate, diuretic.                       |
| 14 | Giallauria             |     |      |      |              |  |  |  | 6 months  | AMI and undergone      | Aspirin, $\beta$ -blocker, ACE           |
| 15 | <i>et al.</i>          |     |      |      |              |  |  |  |           | primary or rescue      | inhibitor, ARB, statin.                  |
| 16 | (2008),                | 61  | 58.5 | 78.5 | None         |  |  |  |           | PCI only.              |                                          |
| 17 | Italy                  |     |      |      | specified.   |  |  |  |           |                        |                                          |
| 18 | Hambrech               |     |      |      |              |  |  |  | 1 year    | Stable CAD defined     | $\beta$ -receptor antagonists, $\beta$ - |
| 19 | <i>et al.</i>          |     |      |      |              |  |  |  |           | by angina pectoralis   | HMG-CoA reductase                        |
| 20 | (2004),                | 101 | 56   | 87.3 | 1997-2001    |  |  |  |           | and amenable to PCI.   | inhibitors, ACE inhibitor,               |
| 21 | Germany                |     |      |      |              |  |  |  |           | AMI patients           | acetylsalicylic acid.                    |
| 22 |                        |     |      |      |              |  |  |  |           | excluded.              |                                          |
| 23 | Higgins <i>et al.</i>  |     |      |      |              |  |  |  | 51 weeks  | Post-PCI patients      | Reference to medical                     |
| 24 | (2001),                | 105 | 60.8 | 81.3 | 1995-1997    |  |  |  |           | only. No AMI 1         | therapy, only breakdown                  |
| 25 | Australia              |     |      |      |              |  |  |  |           | month pre-             | for lipid lowering                       |
| 26 |                        |     |      |      |              |  |  |  |           | procedure.             | medication.                              |
| 27 |                        |     |      |      |              |  |  |  | 12 months | Patients hospitalised  |                                          |
| 28 |                        |     |      |      |              |  |  |  |           | for an ACS (unstable   |                                          |
| 29 | Houle <i>et al.</i>    |     |      |      |              |  |  |  |           | angina, non-ST-        |                                          |
| 30 | (2012),                | 65  | 51.5 | 100  | 2007-2008    |  |  |  |           | elevation or ST        | Reference to medication in               |
| 31 | Canada                 |     |      |      |              |  |  |  |           | elevation MI). PCI,    | usual care group, but no                 |
| 32 |                        |     |      |      |              |  |  |  |           | CABG or no             | breakdown.                               |
| 33 |                        |     |      |      |              |  |  |  |           | revascularisation      |                                          |
| 34 |                        |     |      |      |              |  |  |  |           | procedure.             |                                          |
| 35 | Kovoor <i>et al.</i>   |     |      |      |              |  |  |  | 6 months  | AMI only.              | Aspirin, $\beta$ -blocker, ACE           |
| 36 | (2006),                | 142 | 51.5 | 100  | None         |  |  |  |           | Thrombolytic           | inhibitor, calcium channel               |
| 37 | Australia              |     |      |      | specified.   |  |  |  |           | therapy, one patient   | blockers, nitrates,                      |
| 38 |                        |     |      |      |              |  |  |  |           | in the exercise        | cholesterol-lowering                     |
| 39 |                        |     |      |      |              |  |  |  |           | treatment group had    | agents,                                  |
| 40 |                        |     |      |      |              |  |  |  |           | primary angioplasty.   |                                          |
| 41 | Maddison               |     |      |      |              |  |  |  | 24 weeks  | Diagnosis of IHD       | No description.                          |
| 42 | <i>et al.</i>          |     |      |      |              |  |  |  |           | (angina, MI,           |                                          |
| 43 | (2014),                | 171 | 59   | 20   | 2010-2012    |  |  |  |           | revascularisation,     |                                          |
| 44 | New                    |     |      |      |              |  |  |  |           | including              |                                          |
| 45 | Zealand                |     |      |      |              |  |  |  |           | angioplasty, stent, or |                                          |
| 46 |                        |     |      |      |              |  |  |  |           | CABG).                 |                                          |
| 47 |                        |     |      |      |              |  |  |  |           |                        |                                          |
| 48 |                        |     |      |      |              |  |  |  |           |                        |                                          |
| 49 |                        |     |      |      |              |  |  |  |           |                        |                                          |
| 50 |                        |     |      |      |              |  |  |  | 10 years  |                        | Medication regimens                      |
| 51 | Maroto <i>et al.</i>   |     |      |      | (None        |  |  |  |           |                        | employed in secondary                    |
| 52 | (2005),                | 180 | 76.9 | 57.5 | specified) 2 |  |  |  |           |                        | prevention at discharge                  |
| 53 | Spain                  |     |      |      | year         |  |  |  |           |                        | were clearly insufficient by             |
| 54 |                        |     |      |      | enrollment   |  |  |  |           |                        | standard criteria but                    |
| 55 |                        |     |      |      | period.      |  |  |  |           |                        | currently meet Spanish                   |
| 56 |                        |     |      |      |              |  |  |  |           |                        | and European guidelines'.                |
| 57 |                        |     |      |      |              |  |  |  |           |                        |                                          |
| 58 |                        |     |      |      |              |  |  |  |           |                        |                                          |
| 59 |                        |     |      |      |              |  |  |  |           |                        |                                          |
| 60 |                        |     |      |      |              |  |  |  |           |                        |                                          |
|    | Munk <i>et al.</i>     |     |      |      |              |  |  |  | 6 months  | Stable angina and      | Aspirin, $\beta$ -blocker, ACE           |
|    | (2009),                | 40  | 56.4 | 84.8 | None         |  |  |  |           | unstable angina, post  | inhibitor, ARB, statin,                  |
|    | Norway                 |     |      |      | specified.   |  |  |  |           | PCI only. AMI          | acetylsalicylic acid.                    |
|    |                        |     |      |      |              |  |  |  |           | patients excluded.     |                                          |
|    |                        |     |      |      |              |  |  |  |           |                        |                                          |
|    | Mutwalli <i>et al.</i> |     |      |      |              |  |  |  | 6 months  | Undergone CABG         | Participants received                    |
|    | (2012),                | 49  | 69.7 | 100  | 2008-2010    |  |  |  |           | surgery. Unknown       | advice that focused on                   |
|    | Saudi                  |     |      |      |              |  |  |  |           | whether AMI            | medications', no                         |
|    | Arabia                 |     |      |      |              |  |  |  |           | patients included.     | breakdown.                               |

|    |                                         |     |      |      |                 |                                            |                                                                                |                                                                                                                              |
|----|-----------------------------------------|-----|------|------|-----------------|--------------------------------------------|--------------------------------------------------------------------------------|------------------------------------------------------------------------------------------------------------------------------|
| 1  |                                         |     |      |      |                 | 12 months (mortality data after 5.5 years) | Recent coronary event defined as AMI, PCI, CABG or without invasive procedure. | $\beta$ -blocker, antithrombotics, calcium antagonists, lipid-lowering agents, diuretics.                                    |
| 2  | Oerkild <i>et al.</i> (2012), Denmark   | 40  | 63.5 | 0    | 2007-2008       |                                            |                                                                                |                                                                                                                              |
| 3  |                                         |     |      |      |                 |                                            |                                                                                |                                                                                                                              |
| 4  |                                         |     |      |      |                 |                                            |                                                                                |                                                                                                                              |
| 5  |                                         |     |      |      |                 |                                            |                                                                                |                                                                                                                              |
| 6  | Reid <i>et al.</i> (2012), Canada       | 223 | 54.5 | 87.3 | 2004-2007       | 12 months                                  | ACS including AMI, underwent successful PCI only.                              | Reference to a 'descriptive summary in supplemental table', no access.                                                       |
| 7  |                                         |     |      |      |                 |                                            |                                                                                |                                                                                                                              |
| 8  |                                         |     |      |      |                 |                                            |                                                                                |                                                                                                                              |
| 9  |                                         |     |      |      |                 |                                            |                                                                                |                                                                                                                              |
| 10 | Santaularia <i>et al.</i> (2017), Spain | 85  | 59.6 | 84.7 | None specified. | 12 months                                  | AMI only, no evidence of revascularisation procedure.                          | Reference to cardiac medication, but no breakdown                                                                            |
| 11 |                                         |     |      |      |                 |                                            |                                                                                |                                                                                                                              |
| 12 |                                         |     |      |      |                 |                                            |                                                                                |                                                                                                                              |
| 13 |                                         |     |      |      |                 |                                            |                                                                                |                                                                                                                              |
| 14 | Seki <i>et al.</i> (2008), Japan        | 39  | 57.8 | 83.8 | None specified. | NR                                         | AMI, PCI or CABG.                                                              | Reference to 'lipid-lowering drugs and other medications', no breakdown.                                                     |
| 15 |                                         |     |      |      |                 |                                            |                                                                                |                                                                                                                              |
| 16 |                                         |     |      |      |                 |                                            |                                                                                |                                                                                                                              |
| 17 |                                         |     |      |      |                 |                                            |                                                                                |                                                                                                                              |
| 18 | Toobert <i>et al.</i> (2000), USA       | 25  | 64.5 | 0    | None specified. | 24 months                                  | CAD defined as atherosclerosis, AMI, PCI or CABG.                              | Anti-hypertensive and hypolipidemic medications.                                                                             |
| 19 |                                         |     |      |      |                 |                                            |                                                                                |                                                                                                                              |
| 20 |                                         |     |      |      |                 |                                            |                                                                                |                                                                                                                              |
| 21 | VHSG <i>et al.</i> (2003), Norway       | 197 | 64   | 75.8 | None specified. | 2 years                                    | AMI, unstable angina pectoris or after PCI or CABG.                            | Aspirin, $\beta$ -blocker, statin, ACE inhibitor, calcium antagonist, warfarin.                                              |
| 22 |                                         |     |      |      |                 |                                            |                                                                                |                                                                                                                              |
| 23 |                                         |     |      |      |                 |                                            |                                                                                |                                                                                                                              |
| 24 |                                         |     |      |      |                 |                                            |                                                                                |                                                                                                                              |
| 25 | Wang <i>et al.</i> (2012), China        | 160 | 67   | 63.5 | 2005-2007       | 6 months                                   | AMI only.                                                                      | Anti-platelet, Nitrate, $\beta$ -blocker, ACE inhibitor, calcium antagonist, statin.                                         |
| 26 |                                         |     |      |      |                 |                                            |                                                                                |                                                                                                                              |
| 27 |                                         |     |      |      |                 |                                            |                                                                                |                                                                                                                              |
| 28 |                                         |     |      |      |                 |                                            |                                                                                |                                                                                                                              |
| 29 |                                         |     |      |      |                 |                                            |                                                                                |                                                                                                                              |
| 30 | West <i>et al.</i> (2012), UK           | 181 | 51.9 | 93.9 | 1997-2000       | 7 to 9 years                               | AMI only.                                                                      | Aspirin, $\beta$ -blocker, ACE inhibitor, diuretic, long acting nitrate/ calcium channel blocker, statin, GTN.               |
| 31 |                                         |     |      |      |                 |                                            |                                                                                |                                                                                                                              |
| 32 |                                         |     |      |      |                 |                                            |                                                                                |                                                                                                                              |
| 33 |                                         |     |      |      |                 |                                            |                                                                                |                                                                                                                              |
| 34 | Yu <i>et al.</i> (2004), China          | 269 | 56   | 83.9 | None specified. | 2 years                                    | Recent AMI, after elective PCI or thrombolytic therapy.                        | Anti-platelet, $\beta$ -blocker, calcium channel blocker, nitrate, statin, ACE inhibitor, diuretic.                          |
| 35 |                                         |     |      |      |                 |                                            |                                                                                |                                                                                                                              |
| 36 |                                         |     |      |      |                 |                                            |                                                                                |                                                                                                                              |
| 37 |                                         |     |      |      |                 |                                            |                                                                                |                                                                                                                              |
| 38 |                                         |     |      |      |                 |                                            |                                                                                |                                                                                                                              |
| 39 | Zwisler <i>et al.</i> (2008), Denmark   | 446 | 55.5 | 72.1 | 2000-2003       | 1 year                                     | AMI, angina pectoris or after PCI or CABG.                                     | Antithrombotics, lipid-lowering drugs, $\beta$ -blocker, calcium antagonists, ACE inhibitor, diuretic, long-acting nitrates. |
| 40 |                                         |     |      |      |                 |                                            |                                                                                |                                                                                                                              |

AMI- Acute Myocardial Infarction, CAD- Coronary Artery Disease, PCI- Percutaneous Coronary Intervention, IHD- Ischaemic Heart Disease, CABG- Coronary Artery Bypass Graft, CHD- Coronary Heart Disease, ACS- Acute Coronary Syndrome, ACE- Angiotensin-Converting-Enzyme, ARB- Angiotensin Receptor Blockers, GTN- Glyceryl Trinitrate.

**Table 3. Overview of exercise interventions**

| References, country                 | Exercise Intervention                                   |                  | Study Duration | Session Duration/Frequency/Intensity                                                                | Additional      | Control (comparator)      |
|-------------------------------------|---------------------------------------------------------|------------------|----------------|-----------------------------------------------------------------------------------------------------|-----------------|---------------------------|
|                                     | Exercise                                                | Modality         |                |                                                                                                     |                 |                           |
| Aronov <i>et al.</i> (2010), Russia | Moderate intensity physical training (unknown setting). | Cycle ergometer. | 12 months      | 45 minutes- 60 minutes/ 3 sessions per week/ 50-60% of the performed capacity by bicycle ergometry. | None specified. | Standard medical therapy. |



|    |                       |                    |            |           |                                |             |                |
|----|-----------------------|--------------------|------------|-----------|--------------------------------|-------------|----------------|
| 1  |                       |                    |            |           |                                |             | Recommended    |
| 2  |                       |                    |            |           |                                |             | to perform     |
| 3  |                       |                    |            |           |                                |             | basic daily    |
| 4  | Belardinelli          | Moderate intensity |            |           |                                |             | mild physical  |
| 5  | <i>et al.</i>         | exercise           |            | 6         | 53 minutes/ 3 sessions per     |             | activities but |
| 6  | (2001),               | (supervised in     | Cycle      | months    | week/ 60% of peak oxygen       | None        | to avoid any   |
| 7  | Italy                 | hospital gym).     | ergometer. |           | uptake (VO <sub>2</sub> Peak). | specified.  | physical       |
| 8  |                       |                    |            |           |                                |             | training.      |
| 9  |                       |                    |            |           |                                | Education   | Education,     |
| 10 |                       |                    |            |           |                                | and         | pharmacother   |
| 11 | Briffa <i>et al.</i>  | Aerobic circuit    | Aerobic    | 6 weeks   | 60-90 minutes/ 3 sessions per  | Education   | apy and        |
| 12 | (2005),               | training           | circuit    |           | week/ not specified.           | and         | lifestyle      |
| 13 | Australia             | (supervised in     | training.  |           |                                | counselling | counselling.   |
| 14 |                       |                    |            |           |                                |             |                |
| 15 |                       |                    |            |           |                                |             | Generic        |
| 16 |                       |                    |            |           |                                |             | instructions   |
| 17 | Giallauria            | Moderate intensity |            |           |                                |             | on             |
| 18 | <i>et al.</i>         | exercise           |            |           |                                |             | maintaining    |
| 19 | (2008),               | (supervised in     | Cycle      | 6         | 40 minutes/ 3 sessions per     | None        | physical       |
| 20 | Italy                 | centre).           | ergometer. | months    | week/ 60%-70% of peak          | specified.  | activity and a |
| 21 |                       |                    |            |           |                                |             | correct        |
| 22 |                       |                    |            |           |                                |             | lifestyle.     |
| 23 | Hambrecht             | Moderate intensity |            |           |                                |             | Standard       |
| 24 | <i>et al.</i>         | exercise           |            |           |                                |             | medical        |
| 25 | (2004),               | (supervised in     |            |           |                                |             | therapy.       |
| 26 | Germany               | hospital &         | Cycle      | 12        | 10 minutes- 42 sessions per    | None        |                |
| 27 |                       | unsupervised at    | ergometer. | months    | week (hospital), 20 minutes- 7 | specified.  |                |
| 28 |                       | home).             |            |           | sessions per week (home) plus  |             |                |
| 29 |                       |                    |            |           | 60 minutes' group training- 1  |             |                |
| 30 |                       |                    |            |           | session per week/ 70% of       |             |                |
| 31 |                       |                    |            |           | symptom-limited max HR.        |             |                |
| 32 |                       |                    |            |           |                                |             |                |
| 33 |                       |                    |            |           |                                |             |                |
| 34 | Higgins <i>et al.</i> | Moderate intensity |            |           |                                | Psychologi  | Psychological  |
| 35 | (2001),               | walking            |            |           |                                | cal plus    | support,       |
| 36 | Australia             | programme          | Walking.   | Not       | Not specified/ not specified/  | education.  | education,     |
| 37 |                       | (unsupervised at   |            | specified | not specified.                 |             | counselling    |
| 38 |                       | home).             |            | .         |                                |             | and guidance.  |
| 39 |                       |                    |            |           |                                |             |                |
| 40 |                       |                    |            |           |                                |             |                |
| 41 |                       |                    |            |           |                                |             |                |
| 42 |                       |                    |            |           |                                |             |                |
| 43 |                       |                    |            |           |                                |             |                |
| 44 |                       |                    |            |           |                                |             |                |
| 45 |                       |                    |            |           |                                |             |                |
| 46 |                       |                    |            |           |                                |             |                |
| 47 |                       |                    |            |           |                                |             |                |
| 48 |                       |                    |            |           |                                |             |                |
| 49 |                       |                    |            |           |                                |             |                |
| 50 |                       |                    |            |           |                                |             |                |
| 51 |                       |                    |            |           |                                |             |                |
| 52 |                       |                    |            |           |                                |             |                |
| 53 |                       |                    |            |           |                                |             |                |
| 54 |                       |                    |            |           |                                |             |                |
| 55 |                       |                    |            |           |                                |             |                |
| 56 |                       |                    |            |           |                                |             |                |
| 57 |                       |                    |            |           |                                |             |                |
| 58 |                       |                    |            |           |                                |             |                |
| 59 |                       |                    |            |           |                                |             |                |
| 60 |                       |                    |            |           |                                |             |                |



|    |                                             |                                                                                                                   |                             |           |                                                                          |                                                            |                                                                                                   |
|----|---------------------------------------------|-------------------------------------------------------------------------------------------------------------------|-----------------------------|-----------|--------------------------------------------------------------------------|------------------------------------------------------------|---------------------------------------------------------------------------------------------------|
| 1  |                                             |                                                                                                                   |                             |           |                                                                          |                                                            |                                                                                                   |
| 2  |                                             |                                                                                                                   |                             |           |                                                                          |                                                            |                                                                                                   |
| 3  |                                             |                                                                                                                   |                             |           |                                                                          |                                                            |                                                                                                   |
| 4  |                                             | Moderate/high intensity interval training (supervised in centre).                                                 | Cycle ergometer or running. | 6 months  | 60 minutes/ 3 sessions per week/ 60-70% & 80-90% max HR.                 | Spine & abdominal resistance training.                     | Usual care, including drug therapy.                                                               |
| 5  | Munk <i>et al.</i> (2009), Norway           |                                                                                                                   |                             |           |                                                                          |                                                            |                                                                                                   |
| 6  |                                             | Moderate intensity walking programme (unsupervised at home).                                                      | Walking.                    | 6 months  | 30 minutes/ 7 sessions per week/ not specified.                          | Education.                                                 | Education, standard hospital care.                                                                |
| 7  |                                             |                                                                                                                   |                             |           |                                                                          |                                                            |                                                                                                   |
| 8  |                                             |                                                                                                                   |                             |           |                                                                          |                                                            |                                                                                                   |
| 9  | Mutwalli <i>et al.</i> (2012), Saudi Arabia |                                                                                                                   |                             |           |                                                                          |                                                            |                                                                                                   |
| 10 |                                             | Moderate intensity exercise (unsupervised at home).                                                               | Individualised              | 12 months | 30 minutes/ 6 sessions per week/ 11-13 on the Borg Scale.                | Risk factor management.                                    | Usual care, no exercise education or dietary counselling.                                         |
| 11 | Oerkild <i>et al.</i> (2012), Denmark       |                                                                                                                   |                             |           |                                                                          |                                                            |                                                                                                   |
| 12 |                                             | Internet based physical activity plan and motivational tool to increase physical activity (unsupervised at home). | Not specified.              | 20 weeks  | Not specified/ not specified/ not specified.                             | None specified.                                            | Online education, physical activity guidance and an education booklet.                            |
| 13 |                                             |                                                                                                                   |                             |           |                                                                          |                                                            |                                                                                                   |
| 14 |                                             |                                                                                                                   |                             |           |                                                                          |                                                            |                                                                                                   |
| 15 |                                             |                                                                                                                   |                             |           |                                                                          |                                                            |                                                                                                   |
| 16 |                                             |                                                                                                                   |                             |           |                                                                          |                                                            |                                                                                                   |
| 17 |                                             |                                                                                                                   |                             |           |                                                                          |                                                            |                                                                                                   |
| 18 |                                             |                                                                                                                   |                             |           |                                                                          |                                                            |                                                                                                   |
| 19 |                                             |                                                                                                                   |                             |           |                                                                          |                                                            |                                                                                                   |
| 20 |                                             |                                                                                                                   |                             |           |                                                                          |                                                            |                                                                                                   |
| 21 | Reid <i>et al.</i> (2012), Canada           |                                                                                                                   |                             |           |                                                                          |                                                            |                                                                                                   |
| 22 |                                             |                                                                                                                   |                             |           |                                                                          |                                                            |                                                                                                   |
| 23 |                                             |                                                                                                                   |                             |           |                                                                          |                                                            |                                                                                                   |
| 24 |                                             |                                                                                                                   |                             |           |                                                                          |                                                            |                                                                                                   |
| 25 |                                             |                                                                                                                   |                             |           |                                                                          |                                                            |                                                                                                   |
| 26 |                                             |                                                                                                                   |                             |           |                                                                          |                                                            |                                                                                                   |
| 27 |                                             |                                                                                                                   |                             |           |                                                                          |                                                            |                                                                                                   |
| 28 |                                             |                                                                                                                   |                             |           |                                                                          |                                                            |                                                                                                   |
| 29 | Santaularia <i>et al.</i> (2017), Spain     | Outpatient exercise training programme (supervised in hospital).                                                  | Cycle ergometer             | 10 weeks  | 60 minutes/ 3 sessions per week/ 75-90% max HR (RPE 11-15 on Borg Scale) | Resistance training, education and risk factor management. | Standard care, risk factor management, guidance on physical activity and adherence to medication. |
| 30 |                                             |                                                                                                                   |                             |           |                                                                          |                                                            |                                                                                                   |
| 31 |                                             |                                                                                                                   |                             |           |                                                                          |                                                            |                                                                                                   |
| 32 |                                             |                                                                                                                   |                             |           |                                                                          |                                                            |                                                                                                   |
| 33 |                                             |                                                                                                                   |                             |           |                                                                          |                                                            |                                                                                                   |
| 34 |                                             |                                                                                                                   |                             |           |                                                                          |                                                            |                                                                                                   |
| 35 |                                             |                                                                                                                   |                             |           |                                                                          |                                                            |                                                                                                   |
| 36 |                                             |                                                                                                                   |                             |           |                                                                          |                                                            |                                                                                                   |
| 37 |                                             |                                                                                                                   |                             |           |                                                                          |                                                            |                                                                                                   |
| 38 |                                             |                                                                                                                   |                             |           |                                                                          |                                                            |                                                                                                   |
| 39 |                                             |                                                                                                                   |                             |           |                                                                          |                                                            |                                                                                                   |
| 40 |                                             |                                                                                                                   |                             |           |                                                                          |                                                            |                                                                                                   |
| 41 |                                             |                                                                                                                   |                             |           |                                                                          |                                                            |                                                                                                   |
| 42 |                                             |                                                                                                                   |                             |           |                                                                          |                                                            |                                                                                                   |
| 43 |                                             |                                                                                                                   |                             |           |                                                                          |                                                            |                                                                                                   |
| 44 |                                             |                                                                                                                   |                             |           |                                                                          |                                                            |                                                                                                   |
| 45 |                                             |                                                                                                                   |                             |           |                                                                          |                                                            |                                                                                                   |
| 46 |                                             |                                                                                                                   |                             |           |                                                                          |                                                            |                                                                                                   |
| 47 |                                             |                                                                                                                   |                             |           |                                                                          |                                                            |                                                                                                   |
| 48 |                                             |                                                                                                                   |                             |           |                                                                          |                                                            |                                                                                                   |
| 49 |                                             |                                                                                                                   |                             |           |                                                                          |                                                            |                                                                                                   |
| 50 |                                             |                                                                                                                   |                             |           |                                                                          |                                                            |                                                                                                   |
| 51 |                                             |                                                                                                                   |                             |           |                                                                          |                                                            |                                                                                                   |
| 52 |                                             |                                                                                                                   |                             |           |                                                                          |                                                            |                                                                                                   |
| 53 |                                             |                                                                                                                   |                             |           |                                                                          |                                                            |                                                                                                   |
| 54 |                                             |                                                                                                                   |                             |           |                                                                          |                                                            |                                                                                                   |
| 55 |                                             |                                                                                                                   |                             |           |                                                                          |                                                            |                                                                                                   |
| 56 |                                             |                                                                                                                   |                             |           |                                                                          |                                                            |                                                                                                   |
| 57 |                                             |                                                                                                                   |                             |           |                                                                          |                                                            |                                                                                                   |
| 58 |                                             |                                                                                                                   |                             |           |                                                                          |                                                            |                                                                                                   |
| 59 |                                             |                                                                                                                   |                             |           |                                                                          |                                                            |                                                                                                   |
| 60 |                                             |                                                                                                                   |                             |           |                                                                          |                                                            |                                                                                                   |

|    |                                       |                                                                                                           |                                                                                |              |                                                                                                                         |                                     |                                             |
|----|---------------------------------------|-----------------------------------------------------------------------------------------------------------|--------------------------------------------------------------------------------|--------------|-------------------------------------------------------------------------------------------------------------------------|-------------------------------------|---------------------------------------------|
| 1  |                                       | Ambulatory and aerobic cardiovascular training (supervised in hospital and centre, unsupervised at home). | Walking, treadmill, cycle ergometry, rowing, stepper, arm ergometry, dumbbell. | 8 1/2 months | 2 hours/ 2 sessions per week (centre), not specified (home)/ 65-85% of maximal aerobic capacity (VO <sub>2</sub> Peak). | Resistance training and education.  | Conventional medical therapy and education. |
| 2  |                                       |                                                                                                           |                                                                                |              |                                                                                                                         |                                     |                                             |
| 3  |                                       |                                                                                                           |                                                                                |              |                                                                                                                         |                                     |                                             |
| 4  |                                       |                                                                                                           |                                                                                |              |                                                                                                                         |                                     |                                             |
| 5  |                                       |                                                                                                           |                                                                                |              |                                                                                                                         |                                     |                                             |
| 6  | Yu <i>et al.</i> (2004), China        |                                                                                                           |                                                                                |              |                                                                                                                         |                                     |                                             |
| 7  |                                       |                                                                                                           |                                                                                |              |                                                                                                                         |                                     |                                             |
| 8  |                                       |                                                                                                           |                                                                                |              |                                                                                                                         |                                     |                                             |
| 9  |                                       | Intensive CR programme (supervised in centre).                                                            | Not specified.                                                                 | 6 weeks      | Not specified/ 2 sessions per week/ not specified.                                                                      | Education and psychosocial support. | Education and psychosocial support.         |
| 10 | Zwisler <i>et al.</i> (2008), Denmark |                                                                                                           |                                                                                |              |                                                                                                                         |                                     |                                             |
| 11 |                                       |                                                                                                           |                                                                                |              |                                                                                                                         |                                     |                                             |
| 12 |                                       |                                                                                                           |                                                                                |              |                                                                                                                         |                                     |                                             |

HR- Heart Rate, VO<sub>2</sub> Peak- Peak Oxygen Uptake

## References

- World Health Organisation. Top 10 causes of death worldwide- Fact Sheet 2017 29/05/2017. Available from: <http://www.who.int/mediacentre/factsheets/fs310/en/>.
- NICE. Myocardial Infarction: cardiac rehabilitation and prevention of further cardiovascular disease 2013 31/05/2017. Available from: <https://www.nice.org.uk/guidance/cg172/resources/myocardial-infarction-cardiac-rehabilitation-and-prevention-of-further-cardiovascular-disease-pdf-35109748874437>.
- BACPR. Cardiovascular Disease Prevention and Rehabilitation 2012 31/05/2017. Available from: [http://www.bacpr.com/resources/46C\\_BACPR\\_Standards\\_and\\_Core\\_Components\\_2012.pdf](http://www.bacpr.com/resources/46C_BACPR_Standards_and_Core_Components_2012.pdf).
- Piepoli MF, Corrà U, Adamopoulos S, Benzer W, Bjarnason-Wehrens B, Cupples M, et al. Secondary prevention in the clinical management of patients with cardiovascular diseases. Core components, standards and outcome measures for referral and delivery: a policy statement from the cardiac rehabilitation section of the European Association for Cardiovascular Prevention & Rehabilitation. Endorsed by the Committee for Practice Guidelines of the European Society of Cardiology. *Eur J Prev Cardiol.* 2014;21(6):664-81.
- Balady GJ, Williams MA, Ades PA, Bittner V, Comoss P, Foody JA, et al. Core components of cardiac rehabilitation/secondary prevention programs: 2007 update: a scientific statement from the American Heart Association Exercise, Cardiac Rehabilitation, and Prevention Committee, the Council on Clinical Cardiology; the Councils on Cardiovascular Nursing, Epidemiology and Prevention, and Nutrition, Physical Activity, and Metabolism; and the American Association of Cardiovascular and Pulmonary Rehabilitation. *J Cardiopulm Rehabil Prev.* 2007;27(3):121-9.
- ACPICR. Standards for Physical Activity and Exercise in the Cardiovascular Population 2015 31/05/2017. Available from: [http://acpicr.com/sites/default/files/ACPICR\\_Standards\\_2015.pdf](http://acpicr.com/sites/default/files/ACPICR_Standards_2015.pdf).
- Dalal HM, Doherty P, Taylor RS. Cardiac rehabilitation. *BMJ.* 2015;351:h5000.
- Buckley JP, Furze G, Doherty P, Speck L, Connolly S, Hinton S, et al. BACPR scientific statement: British standards and core components for cardiovascular disease prevention and rehabilitation. *Heart.* 2013;99(15):1069-71.
- Dalal HM, Zawada A, Jolly K, Moxham T, Taylor RS. Home based versus centre based cardiac rehabilitation: Cochrane systematic review and meta-analysis. *BMJ.* 2010;340:b5631.
- Anderson L, Oldridge N, Thompson DR, Zwisler AD, Rees K, Martin N, et al. Exercise-Based Cardiac Rehabilitation for Coronary Heart Disease: Cochrane Systematic Review and Meta-Analysis. *J Am Coll Cardiol.* 2016;67(1):1-12.
- Keeley EC, Boura JA, Grines CL. Primary angioplasty versus intravenous thrombolytic therapy for acute myocardial infarction: a quantitative review of 23 randomised trials. *Lancet.* 2003;361(9351):13-20.
- D'Souza SP, Mamas MA, Fraser DG, Fath-Ordoubadi F. Routine early coronary angioplasty versus ischaemia-guided angioplasty after thrombolysis in acute ST-elevation myocardial infarction: a meta-analysis. *Eur Heart J.* 2011;32(8):972-82.
- Van de Werf F, Ardissino D, Betriu A, Cokkinos DV, Falk E, Fox KA, et al. Management of acute myocardial infarction in patients presenting with ST-segment elevation. The Task Force on the Management of Acute Myocardial Infarction of the European Society of Cardiology. *Eur Heart J.* 2003;24(1):28-66.
- West RM, Cattle BA, Bouyssié M, Squire I, de Belder M, Fox KA, et al. Impact of hospital proportion and volume on primary percutaneous coronary intervention performance in England and Wales. *Eur Heart J.* 2011;32(6):706-11.

15. Anon. Reduction in mortality after myocardial infarction with long-term beta-adrenoceptor blockade. Multicentre international study: supplementary report. *Br Med J.* 1977;2(6084):419-21.
16. Elwood PC, Cochrane AL, Burr ML, Sweetnam PM, Williams G, Welsby E, et al. A randomized controlled trial of acetyl salicylic acid in the secondary prevention of mortality from myocardial infarction. *Br Med J.* 1974;1(5905):436-40.
17. Anon. Randomised trial of cholesterol lowering in 4444 patients with coronary heart disease: the Scandinavian Simvastatin Survival Study (4S). *Lancet.* 1994;344(8934):1383-9.
18. Anon. Indications for ACE inhibitors in the early treatment of acute myocardial infarction: systematic overview of individual data from 100,000 patients in randomized trials. ACE Inhibitor Myocardial Infarction Collaborative Group. *Circulation.* 1998;97(22):2202-12.
19. Skinner JS, Minhas R. Commentary on NICE guidance for secondary prevention for patients following a myocardial infarction. *Heart.* 2007;93(7):864-6.
20. Eisen A, Bhatt DL. Optimal duration of dual antiplatelet therapy after acute coronary syndromes and coronary stenting. *Heart.* 2016.
21. Gaziano TA, Bitton A, Anand S, Abrahams-Gessel S, Murphy A. Growing epidemic of coronary heart disease in low- and middle-income countries. *Curr Probl Cardiol.* 2010;35(2):72-115.
22. Moher D, Liberati A, Tetzlaff J, Altman DG, Group P. Preferred reporting items for systematic reviews and meta-analyses: the PRISMA Statement. *Open Med.* 2009;3(3):e123-30.
23. The Task Force on the Management of Acute Myocardial Infarction of the European Society of Cardiology. Acute myocardial infarction: pre-hospital and in-hospital management. The Task Force on the Management of Acute Myocardial Infarction of the European Society of Cardiology. *Eur Heart J.* 1996;17(1):43-63.
24. Wood DA DP, Poutler N, et al. Joint British recommendations on prevention of coronary heart disease in clinical practice. British Cardiac Society, British Hyperlipidaemia Association, British Hypertension Society, endorsed by the British Diabetic Association. *Heart.* 1998;80 Suppl 2:S1-29.
25. RevMan. The Nordic Cochrane Centre: The Cochrane Collaboration, version 5.3 (Review Manager)2014.
26. Higgins JP, Thompson SG, Deeks JJ, Altman DG. Measuring inconsistency in meta-analyses. *BMJ.* 2003;327(7414):557-60.
27. Higgins JP, Altman DG, Gøtzsche PC, Jüni P, Moher D, Oxman AD, et al. The Cochrane Collaboration's tool for assessing risk of bias in randomised trials. *BMJ.* 2011;343:d5928.
28. Kadda O, Kotanidou A, Manginas A, Stavridis G, Nanas S, Panagiotakos DB. Lifestyle intervention and one-year prognosis of patients following open heart surgery: a randomised clinical trial. *Journal of Clinical Nursing.* 2015;24(11-12):1611-21.
29. Santaularia N, Caminal J, Arnau A, Perramon M, Montesinos J, Abenoza Guardiola M, et al. The efficacy of a supervised exercise training programme on readmission rates in patients with myocardial ischemia: Results from a randomised controlled trial. *European Journal of Cardiovascular Nursing.* 2017;16(3):201-12.
30. Hambrecht R, Walther C, Möbius-Winkler S, Gielen S, Linke A, Conradi K, et al. Percutaneous coronary angioplasty compared with exercise training in patients with stable coronary artery disease: a randomized trial. *Circulation.* 2004;109(11):1371-8.
31. West RR, Jones DA, Henderson AH. Rehabilitation after myocardial infarction (RAMIT): multi-centre randomised controlled trial of comprehensive cardiac rehabilitation in patients following acute myocardial infarction. *Heart.* 2012;98(8):637-44.
32. Belardinelli R, Paolini I, Cianci G, Piva R, Georgiou D, Purcaro A. Exercise training intervention after coronary angioplasty: the ETICA trial. *J Am Coll Cardiol.* 2001;37(7):1891-900.
33. Giallauria F, Cirillo P, Lucci R, Pacileo M, De Lorenzo A, D'Agostino M, et al. Left ventricular remodelling in patients with moderate systolic dysfunction after myocardial infarction: favourable effects of exercise training and predictive role of N-terminal pro-brain natriuretic peptide. *Eur J Cardiovasc Prev Rehabil.* 2008;15(1):113-8.
34. Maroto JM, Artigao Ramírez R, Morales Durán MD, de Pablo Zarzosa C, Abaira V. [Cardiac rehabilitation in patients with myocardial infarction: a 10-year follow-up study]. *Rev Esp Cardiol.* 2005;58(10):1181-7.
35. Munk PS, Staal EM, Butt N, Isaksen K, Larsen AI. High-intensity interval training may reduce in-stent restenosis following percutaneous coronary intervention with stent implantation A randomized controlled trial evaluating the relationship to endothelial function and inflammation. *Am Heart J.* 2009;158(5):734-41.
36. Oerkild B, Frederiksen M, Hansen JF, Prescott E. Home-based cardiac rehabilitation is an attractive alternative to no cardiac rehabilitation for elderly patients with coronary heart disease: results from a randomised clinical trial. *BMJ Open.* 2012;2(6).
37. Vestfold Heartcare Study Group. Influence on lifestyle measures and five-year coronary risk by a comprehensive lifestyle intervention programme in patients with coronary heart disease. *Eur J Cardiovasc Prev Rehabil.* 2003;10(6):429-37.
38. Zwisler AD, Soja AM, Rasmussen S, Frederiksen M, Abedini S, Abadini S, et al. Hospital-based comprehensive cardiac rehabilitation versus usual care among patients with congestive heart failure, ischemic heart

- disease, or high risk of ischemic heart disease: 12-month results of a randomized clinical trial. *Am Heart J*. 2008;155(6):1106-13.
39. Aronov DM, Krasnitskii VB, Bubnova MG, Pozdnyakov IM, Ioseliani DG, Shchegol'kov AN, et al. [Physical training at ambulatory-polyclinical stage in complex rehabilitation and secondary prevention of patients with ischemic heart disease after acute incidents. Effect on physical working capacity, hemodynamics, blood lipids, clinical course and prognosis (Russian cooperative study)]. *Kardiologiya*. 2009;49(3):49-56.
40. Briffa TG, Eckermann SD, Griffiths AD, Harris PJ, Heath MR, Freedman SB, et al. Cost-effectiveness of rehabilitation after an acute coronary event: a randomised controlled trial. *Med J Aust*. 2005;183(9):450-5.
41. Higgins HC, Hayes RL, McKenna KT. Rehabilitation outcomes following percutaneous coronary interventions (PCI). *Patient Educ Couns*. 2001;43(3):219-30.
42. Houle J, Doyon O, Vadeboncoeur N, Turbide G, Diaz A, Poirier P. Effectiveness of a pedometer-based program using a socio-cognitive intervention on physical activity and quality of life in a setting of cardiac rehabilitation. *Can J Cardiol*. 2012;28(1):27-32.
43. Kovoov P, Lee AK, Carrozzi F, Wiseman V, Byth K, Zecchin R, et al. Return to full normal activities including work at two weeks after acute myocardial infarction. *Am J Cardiol*. 2006;97(7):952-8.
44. Maddison R, Pfaeffli L, Whittaker R, Stewart R, Kerr A, Jiang Y, et al. A mobile phone intervention increases physical activity in people with cardiovascular disease: Results from the HEART randomized controlled trial. *Eur J Prev Cardiol*. 2014;22(6):701-9.
45. Mutwalli HA, Fallows SJ, Arnous AA, Zamzami MS. Randomized controlled evaluation shows the effectiveness of a home-based cardiac rehabilitation program. *Saudi Med J*. 2012;33(2):152-9.
46. Reid RD, Morrin LI, Beaton LJ, Papadakis S, Kocourek J, McDonnell L, et al. Randomized trial of an internet-based computer-tailored expert system for physical activity in patients with heart disease. *Eur J Prev Cardiol*. 2012;19(6):1357-64.
47. Seki E, Watanabe Y, Shimada K, Sunayama S, Onishi T, Kawakami K, et al. Effects of a phase III cardiac rehabilitation program on physical status and lipid profiles in elderly patients with coronary artery disease: Juntendo Cardiac Rehabilitation Program (J-CARP). *Circ J*. 2008;72(8):1230-4.
48. Toobert DJ, Glasgow RE, Radcliffe JL. Physiologic and related behavioral outcomes from the Women's Lifestyle Heart Trial. *Ann Behav Med*. 2000;22(1):1-9.
49. Wang W, Chair SY, Thompson DR, Twinn SF. Effects of home-based rehabilitation on health-related quality of life and psychological status in Chinese patients recovering from acute myocardial infarction. *Heart Lung*. 2012;41(1):15-25.
50. Yu CM, Lau CP, Chau J, McGhee S, Kong SL, Cheung BM, et al. A short course of cardiac rehabilitation program is highly cost effective in improving long-term quality of life in patients with recent myocardial infarction or percutaneous coronary intervention. *Arch Phys Med Rehabil*. 2004;85(12):1915-22.
51. Toobert DJ, Strycker LA, Glasgow RE. Lifestyle change in women with coronary heart disease: what do we know? *J Womens Health*. 1998;7(6):685-99.
52. Jolliffe JA, Rees K, Taylor RS, Thompson D, Oldridge N, Ebrahim S. Exercise-based rehabilitation for coronary heart disease. *Cochrane Database Syst Rev*. 2001(1):CD001800.
53. Heran BS, Chen JM, Ebrahim S, Moxham T, Oldridge N, Rees K, et al. Exercise-based cardiac rehabilitation for coronary heart disease. *Cochrane Database Syst Rev*. 2011(7):CD001800.
54. Wilhelmsen L, Sanne H, Elmfeldt D, Grimby G, Tibblin G, Wedel H. A controlled trial of physical training after myocardial infarction. Effects on risk factors, nonfatal reinfarction, and death. *Prev Med*. 1975;4(4):491-508.
55. van Halewijn G, Deckers J, Tay HY, van Domburg R, Kotseva K, Wood D. Lessons from contemporary trials of cardiovascular prevention and rehabilitation: A systematic review and meta-analysis. *Int J Cardiol*. 2017;232:294-303.
56. Valkeinen H, Aaltonen S, Kujala UM. Effects of exercise training on oxygen uptake in coronary heart disease: a systematic review and meta-analysis. *Scand J Med Sci Sports*. 2010;20(4):545-55.
57. Yohannes AM, Doherty P, Bundy C, Yalfani A. The long-term benefits of cardiac rehabilitation on depression, anxiety, physical activity and quality of life. *J Clin Nurs*. 2010;19(19-20):2806-13.
58. Conraads VM, Denollet J, De Maeyer C, Van Craenenbroeck E, Verheyen J, Beckers P. Exercise training as an essential component of cardiac rehabilitation. *Heart*. 2012;98(8):674-5; author reply 5.
59. Sattelmair J, Pertman J, Ding EL, Kohl HW, Haskell W, Lee IM. Dose response between physical activity and risk of coronary heart disease: a meta-analysis. *Circulation*. 2011;124(7):789-95.
60. Kodama S, Saito K, Tanaka S, Maki M, Yachi Y, Asumi M, et al. Cardiorespiratory fitness as a quantitative predictor of all-cause mortality and cardiovascular events in healthy men and women: a meta-analysis. *JAMA*. 2009;301(19):2024-35.
61. Garber CE, Blissmer B, Deschenes MR, Franklin BA, Lamonte MJ, Lee IM, et al. American College of Sports Medicine position stand. Quantity and quality of exercise for developing and maintaining cardiorespiratory, musculoskeletal, and neuromotor fitness in apparently healthy adults: guidance for prescribing exercise. *Med Sci Sports Exerc*. 2011;43(7):1334-59.

1  
2 62. McGregor G, Nichols S, Hamborg T, Bryning L, Tudor-Edwards R, Markland D, et al. High-intensity  
3 interval training versus moderate-intensity steady-state training in UK cardiac rehabilitation programmes (HIIT or  
4 MISS UK): study protocol for a multicentre randomised controlled trial and economic evaluation. *BMJ Open*.  
2016;6(11):e012843.

5 63. Slade SC, Dionne CE, Underwood M, Buchbinder R, Beck B, Bennell K, et al. Consensus on Exercise  
6 Reporting Template (CERT): Modified Delphi Study. *Phys Ther*. 2016;96(10):1514-24.

## 7 8 **Legends**

9 *Figure 1.* Summary of study selection process

10 *Figure 2.* All-cause mortality for studies at their longest follow-up period. Filled squares represent the risk difference for individual  
11 studies at the longest reported follow-up. The boxes are proportional to the weight of each study and the lines represent their 95%  
12 confidence interval (CI). The filled diamond represents the pooled risk difference. Weights are from random effects analysis. CR-  
13 Cardiac Rehabilitation.

14 *Figure 3.* Cardiovascular mortality for studies at their longest follow-up period. Filled squares represent the risk difference for  
15 individual studies at the longest reported follow-up. The boxes are proportional to the weight of each study and the lines represent  
16 their 95% confidence interval (CI). The filled diamond represents the pooled risk difference. Weights are from random effects  
17 analysis. CR- Cardiac Rehabilitation.

18 *Figure 4.* Hospital admissions for studies at their longest follow-up period. Filled squares represent the risk difference for  
19 individual studies at the longest reported follow-up. The boxes are proportional to the weight of each study and the lines represent  
20 their 95% confidence interval (CI). The filled diamond represents the pooled risk difference. Weights are from random effects  
21 analysis. CR- Cardiac Rehabilitation.

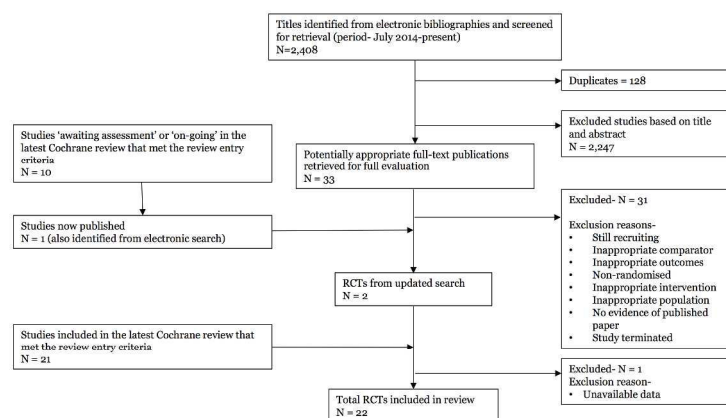

Figure 1. Summary of study selection process.

338x190mm (300 x 300 DPI)





Figure 2. All-cause mortality for studies at their longest follow-up period. Filled squares represent the risk difference for individual studies at the longest reported follow-up. The boxes are proportional to the weight of each study and the lines represent their 95% confidence interval (CI). The filled diamond represents the pooled risk difference. Weights are from random effects analysis. CR- Cardiac Rehabilitation.

209x278mm (300 x 300 DPI)





Figure 3. Cardiovascular mortality for studies at their longest follow-up period. Filled squares represent the risk difference for individual studies at the longest reported follow-up. The boxes are proportional to the weight of each study and the lines represent their 95% confidence interval (CI). The filled diamond represents the pooled risk difference. Weights are from random effects analysis. CR- Cardiac Rehabilitation.

209x278mm (300 x 300 DPI)



Figure 4. Hospital admissions for studies at their longest follow-up period. Filled squares represent the risk difference for individual studies at the longest reported follow-up. The boxes are proportional to the weight of each study and the lines represent their 95% confidence interval (CI). The filled diamond represents the pooled risk difference. Weights are from random effects analysis. CR- Cardiac Rehabilitation.

209x278mm (300 x 300 DPI)

**Appendix 1**

Search Name: CENTRAL repeat search- limited 2014-2017

Last Saved: 28/02/2017 14:50:03.214

Description: 28/02/17

ID Search

#1 MeSH descriptor: [Myocardial Ischemia] explode all trees

#2 (myocard\* near isch\*mi\*):ti,ab,kw

#3 isch\*mi\* near heart:ti,ab,kw

#4 MeSH descriptor: [Coronary Artery Bypass] explode all trees

#5 myocard\* near infarct\*:ti,ab,kw

#6 heart near infarct\*:ti,ab,kw

#7 angina:ti,ab,kw

#8 coronary near (disease\* or bypass or thrombo\* or angioplast\*):ti,ab,kw

#9 MeSH descriptor: [Percutaneous Coronary Intervention] explode all trees

#10 (percutaneous next coronary near/2 (interven\* or revascular\*))

#11 MeSH descriptor: [Angioplasty] explode all trees

#12 angioplast\*

#13 ((coronary or arterial) near/4 dilat\*)

#14 endoluminal next repair\*

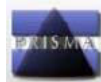

# PRISMA 2009 Checklist

| Section/topic                      | #  | Checklist item                                                                                                                                                                                                                                                                                              | Reported on page # |
|------------------------------------|----|-------------------------------------------------------------------------------------------------------------------------------------------------------------------------------------------------------------------------------------------------------------------------------------------------------------|--------------------|
| <b>TITLE</b>                       |    |                                                                                                                                                                                                                                                                                                             |                    |
| Title                              | 1  | Identify the report as a systematic review, meta-analysis, or both.                                                                                                                                                                                                                                         | 1                  |
| <b>ABSTRACT</b>                    |    |                                                                                                                                                                                                                                                                                                             |                    |
| Structured summary                 | 2  | Provide a structured summary including, as applicable: background; objectives; data sources; study eligibility criteria, participants, and interventions; study appraisal and synthesis methods; results; limitations; conclusions and implications of key findings; systematic review registration number. | 2                  |
| <b>INTRODUCTION</b>                |    |                                                                                                                                                                                                                                                                                                             |                    |
| Rationale                          | 3  | Describe the rationale for the review in the context of what is already known.                                                                                                                                                                                                                              | 3                  |
| Objectives                         | 4  | Provide an explicit statement of questions being addressed with reference to participants, interventions, comparisons, outcomes, and study design (PICOS).                                                                                                                                                  | 4                  |
| <b>METHODS</b>                     |    |                                                                                                                                                                                                                                                                                                             |                    |
| Protocol and registration          | 5  | Indicate if a review protocol exists, if and where it can be accessed (e.g., Web address), and, if available, provide registration information including registration number.                                                                                                                               | 2                  |
| Eligibility criteria               | 6  | Specify study characteristics (e.g., PICOS, length of follow-up) and report characteristics (e.g., years considered, language, publication status) used as criteria for eligibility, giving rationale.                                                                                                      | 4,5                |
| Information sources                | 7  | Describe all information sources (e.g., databases with dates of coverage, contact with study authors to identify additional studies) in the search and date last searched.                                                                                                                                  | 4                  |
| Search                             | 8  | Present full electronic search strategy for at least one database, including any limits used, such that it could be repeated.                                                                                                                                                                               | 4/appendix 1       |
| Study selection                    | 9  | State the process for selecting studies (i.e., screening, eligibility, included in systematic review, and, if applicable, included in the meta-analysis).                                                                                                                                                   | 4,5                |
| Data collection process            | 10 | Describe method of data extraction from reports (e.g., piloted forms, independently, in duplicate) and any processes for obtaining and confirming data from investigators.                                                                                                                                  | 6                  |
| Data items                         | 11 | List and define all variables for which data were sought (e.g., PICOS, funding sources) and any assumptions and simplifications made.                                                                                                                                                                       | 4,5                |
| Risk of bias in individual studies | 12 | Describe methods used for assessing risk of bias of individual studies (including specification of whether this was done at the study or outcome level), and how this information is to be used in any data synthesis.                                                                                      | 6                  |
| Summary measures                   | 13 | State the principal summary measures (e.g., risk ratio, difference in means).                                                                                                                                                                                                                               | 6                  |
| Synthesis of results               | 14 | Describe the methods of handling data and combining results of studies, if done, including measures of consistency (e.g., $I^2$ ) for each meta-analysis.                                                                                                                                                   | 6                  |



# PRISMA 2009 Checklist

| Section/topic                 | #  | Checklist item                                                                                                                                                                                           | Reported on page # |
|-------------------------------|----|----------------------------------------------------------------------------------------------------------------------------------------------------------------------------------------------------------|--------------------|
| Risk of bias across studies   | 15 | Specify any assessment of risk of bias that may affect the cumulative evidence (e.g., publication bias, selective reporting within studies).                                                             | 5,6                |
| Additional analyses           | 16 | Describe methods of additional analyses (e.g., sensitivity or subgroup analyses, meta-regression), if done, indicating which were pre-specified.                                                         | N/A                |
| <b>RESULTS</b>                |    |                                                                                                                                                                                                          |                    |
| Study selection               | 17 | Give numbers of studies screened, assessed for eligibility, and included in the review, with reasons for exclusions at each stage, ideally with a flow diagram.                                          | 7                  |
| Study characteristics         | 18 | For each study, present characteristics for which data were extracted (e.g., study size, PICOS, follow-up period) and provide the citations.                                                             | 12-17              |
| Risk of bias within studies   | 19 | Present data on risk of bias of each study and, if available, any outcome level assessment (see item 12).                                                                                                | 6, 12,13           |
| Results of individual studies | 20 | For all outcomes considered (benefits or harms), present, for each study: (a) simple summary data for each intervention group (b) effect estimates and confidence intervals, ideally with a forest plot. | 8,9                |
| Synthesis of results          | 21 | Present results of each meta-analysis done, including confidence intervals and measures of consistency.                                                                                                  | 8,9/figures 2,3,4  |
| Risk of bias across studies   | 22 | Present results of any assessment of risk of bias across studies (see Item 15).                                                                                                                          | 8,9                |
| Additional analysis           | 23 | Give results of additional analyses, if done (e.g., sensitivity or subgroup analyses, meta-regression [see Item 16]).                                                                                    | N/A                |
| <b>DISCUSSION</b>             |    |                                                                                                                                                                                                          |                    |
| Summary of evidence           | 24 | Summarize the main findings including the strength of evidence for each main outcome; consider their relevance to key groups (e.g., healthcare providers, users, and policy makers).                     | 9,10               |
| Limitations                   | 25 | Discuss limitations at study and outcome level (e.g., risk of bias), and at review-level (e.g., incomplete retrieval of identified research, reporting bias).                                            | 10,11              |
| Conclusions                   | 26 | Provide a general interpretation of the results in the context of other evidence, and implications for future research.                                                                                  | 11                 |
| <b>FUNDING</b>                |    |                                                                                                                                                                                                          |                    |
| Funding                       | 27 | Describe sources of funding for the systematic review and other support (e.g., supply of data); role of funders for the systematic review.                                                               | 12                 |

From: Moher D, Liberati A, Tetzlaff J, Altman DG, The PRISMA Group (2009). Preferred Reporting Items for Systematic Reviews and Meta-Analyses: The PRISMA Statement. PLoS Med 6(6): e1000097. doi:10.1371/journal.pmed1000097

For more information, visit: [www.prisma-statement.org](http://www.prisma-statement.org).
